# Supplementary material for: AlphaFold Accurately Predicts the Structure of Ribosomally Synthesized and Post-Translationally Modified Peptide Biosynthetic Enzymes
Source: MDPI journal article supplement (doi:10.3390/biom13081243), 2023-08-12

## Supporting Information for

# AlphaFold Accurately Predicts the Structure of RiPP Biosynthetic Enzymes

**Figure S1.** Comparison of monomer structure predictions of enzymes not involved in RiPP biosynthesis with those that are. Mean TMscores (A) and RMSD (B) are represented by the horizontal lines. Error bars represent standard deviations, and gray circles are values from individual comparisons.

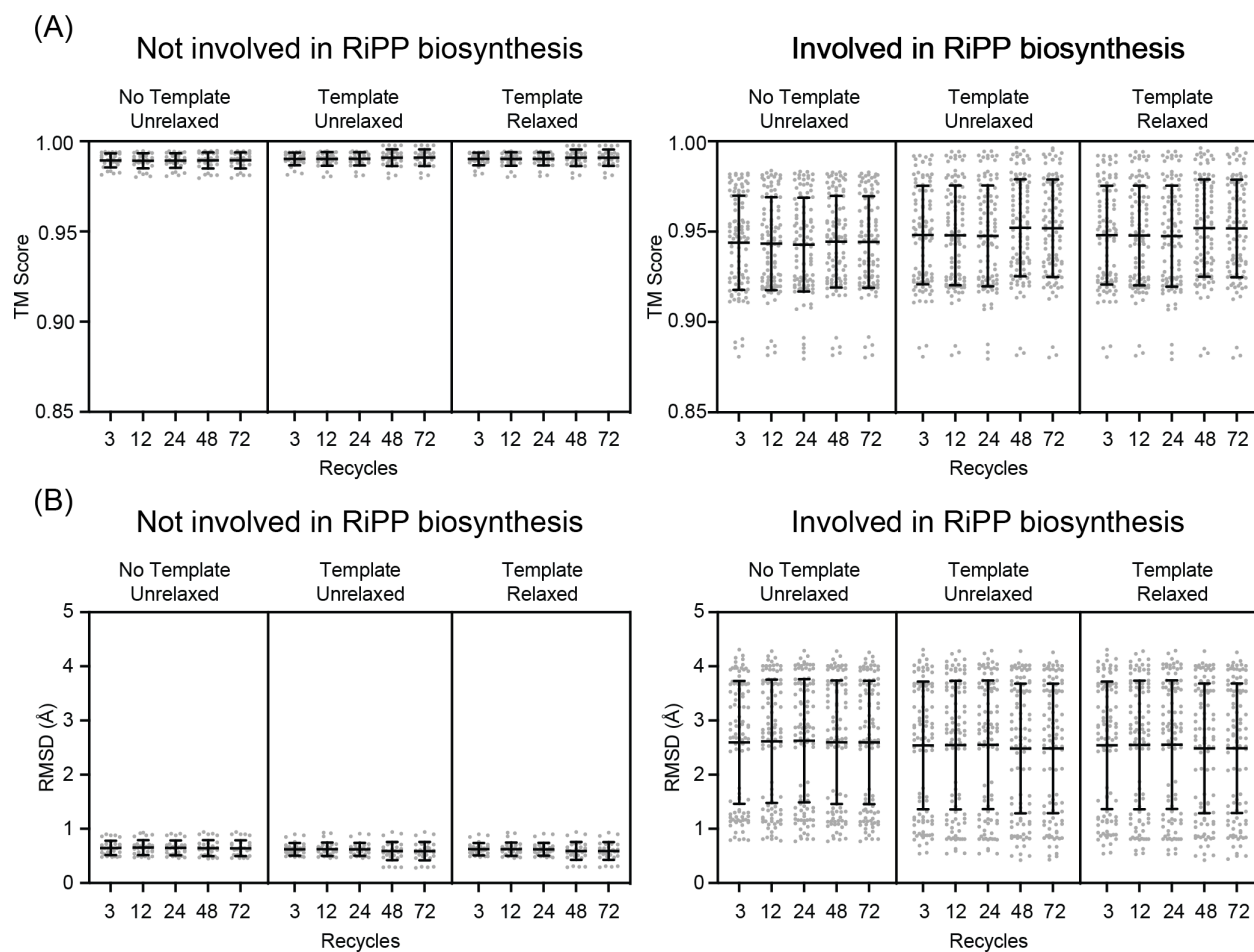

**Figure S2.** Comparison of monomers in experimental structures for enzymes not involved in RiPP biosynthesis (3VPB and 3VPD) and those that are (5IG8, 5IG9, 7DRM, 7M4S, and 7MGV). Mean TMscores and RMSD are represented by the horizontal lines. Error bars represent standard deviations, and gray circles are values from individual comparisons.

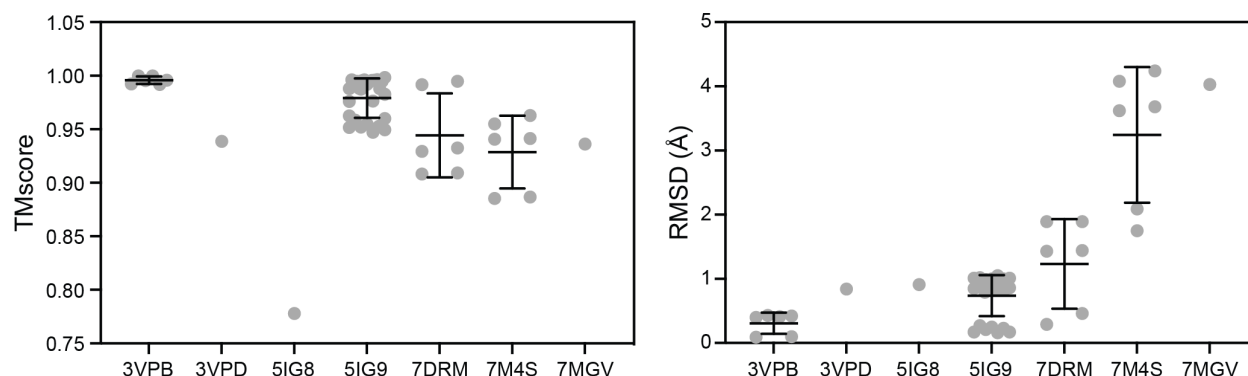

**Table S1.** Monomer ATP Grasp Ligase RiPP biosynthetic enzyme US-align results without template or AMBER. Enzymes with multiple available reference subunits are denoted with their corresponding chain letters.

| PDB ID: | Recycle Number: | Model Number and PDB Reference Chain: | Rank: | TMscore: | RMSD (Å): | Sequence Identity: |
|---------|-----------------|---------------------------------------|-------|----------|-----------|--------------------|
| 3VPB    | 3               | 1-A                                   | 3     | 0.9918   | 0.57      | 1.000              |
| 3VPB    | 3               | 2-A                                   | 5     | 0.9902   | 0.62      | 1.000              |
| 3VPB    | 3               | 3-A                                   | 1     | 0.9918   | 0.57      | 1.000              |
| 3VPB    | 3               | 4-A                                   | 4     | 0.9885   | 0.67      | 1.000              |
| 3VPB    | 3               | 5-A                                   | 2     | 0.9896   | 0.64      | 1.000              |
| 3VPB    | 3               | 1-B                                   | 3     | 0.9896   | 0.64      | 1.000              |
| 3VPB    | 3               | 2-B                                   | 5     | 0.9897   | 0.64      | 1.000              |
| 3VPB    | 3               | 3-B                                   | 1     | 0.9911   | 0.59      | 1.000              |
| 3VPB    | 3               | 4-B                                   | 4     | 0.9879   | 0.70      | 1.000              |
| 3VPB    | 3               | 5-B                                   | 2     | 0.9889   | 0.67      | 1.000              |
| 3VPB    | 3               | 1-C                                   | 3     | 0.9929   | 0.53      | 1.000              |
| 3VPB    | 3               | 2-C                                   | 5     | 0.9938   | 0.49      | 1.000              |
| 3VPB    | 3               | 3-C                                   | 1     | 0.9939   | 0.49      | 1.000              |
| 3VPB    | 3               | 4-C                                   | 4     | 0.9939   | 0.49      | 1.000              |
| 3VPB    | 3               | 5-C                                   | 2     | 0.9917   | 0.57      | 1.000              |
| 3VPB    | 3               | 1-D                                   | 3     | 0.9931   | 0.52      | 1.000              |
| 3VPB    | 3               | 2-D                                   | 5     | 0.9940   | 0.48      | 1.000              |
| 3VPB    | 3               | 3-D                                   | 1     | 0.9931   | 0.52      | 1.000              |
| 3VPB    | 3               | 4-D                                   | 4     | 0.9940   | 0.48      | 1.000              |
| 3VPB    | 3               | 5-D                                   | 2     | 0.9922   | 0.56      | 1.000              |
| 3VPD    | 3               | 1-A                                   | 5     | 0.9826   | 0.88      | 1.000              |
| 3VPD    | 3               | 2-A                                   | 4     | 0.9834   | 0.86      | 1.000              |
| 3VPD    | 3               | 3-A                                   | 1     | 0.9822   | 0.88      | 1.000              |
| 3VPD    | 3               | 4-A                                   | 2     | 0.9833   | 0.85      | 1.000              |
| 3VPD    | 3               | 5-A                                   | 3     | 0.9814   | 0.90      | 1.000              |
| 3VPD    | 3               | 1-B                                   | 5     | 0.9871   | 0.72      | 1.000              |
| 3VPD    | 3               | 2-B                                   | 4     | 0.9886   | 0.69      | 1.000              |
| 3VPD    | 3               | 3-B                                   | 1     | 0.9882   | 0.71      | 1.000              |
| 3VPD    | 3               | 4-B                                   | 2     | 0.9876   | 0.72      | 1.000              |
| 3VPD    | 3               | 5-B                                   | 3     | 0.9857   | 0.76      | 1.000              |
| 5IG8    | 3               | 1-A                                   | 5     | 0.9823   | 0.79      | 1.000              |

| PDB ID: | Recycle Number: | Model Number and PDB Reference Chain: | Rank: | TMscore: | RMSD (Å): | Sequence Identity: |
|---------|-----------------|---------------------------------------|-------|----------|-----------|--------------------|
| 5IG8    | 3               | 2-A                                   | 4     | 0.9821   | 0.79      | 1.000              |
| 5IG8    | 3               | 3-A                                   | 1     | 0.9818   | 0.80      | 1.000              |
| 5IG8    | 3               | 4-A                                   | 3     | 0.9813   | 0.81      | 1.000              |
| 5IG8    | 3               | 5-A                                   | 2     | 0.9801   | 0.84      | 1.000              |
| 5IG8    | 3               | 1-B                                   | 5     | 0.9823   | 0.79      | 1.000              |
| 5IG8    | 3               | 2-B                                   | 4     | 0.9821   | 0.79      | 1.000              |
| 5IG8    | 3               | 3-B                                   | 1     | 0.9818   | 0.80      | 1.000              |
| 5IG8    | 3               | 4-B                                   | 3     | 0.9813   | 0.81      | 1.000              |
| 5IG8    | 3               | 5-B                                   | 2     | 0.9801   | 0.84      | 1.000              |
| 5IG9    | 3               | 1-A                                   | 5     | 0.9403   | 3.97      | 0.981              |
| 5IG9    | 3               | 2-A                                   | 3     | 0.9471   | 3.91      | 0.981              |
| 5IG9    | 3               | 3-A                                   | 1     | 0.9450   | 3.94      | 0.981              |
| 5IG9    | 3               | 4-A                                   | 4     | 0.9411   | 3.96      | 0.981              |
| 5IG9    | 3               | 5-A                                   | 2     | 0.9465   | 3.94      | 0.981              |
| 5IG9    | 3               | 1-B                                   | 5     | 0.9659   | 1.35      | 0.980              |
| 5IG9    | 3               | 2-B                                   | 3     | 0.9722   | 1.22      | 0.980              |
| 5IG9    | 3               | 3-B                                   | 1     | 0.9726   | 1.22      | 0.980              |
| 5IG9    | 3               | 4-B                                   | 4     | 0.9678   | 1.32      | 0.980              |
| 5IG9    | 3               | 5-B                                   | 2     | 0.9749   | 1.17      | 0.980              |
| 5IG9    | 3               | 1-C                                   | 5     | 0.9493   | 3.29      | 0.984              |
| 5IG9    | 3               | 2-C                                   | 3     | 0.9556   | 3.24      | 0.984              |
| 5IG9    | 3               | 3-C                                   | 1     | 0.9552   | 3.25      | 0.984              |
| 5IG9    | 3               | 4-C                                   | 4     | 0.9528   | 3.25      | 0.984              |
| 5IG9    | 3               | 5-C                                   | 2     | 0.9563   | 3.25      | 0.984              |
| 5IG9    | 3               | 1-D                                   | 5     | 0.9699   | 1.30      | 0.984              |
| 5IG9    | 3               | 2-D                                   | 3     | 0.9763   | 1.17      | 0.984              |
| 5IG9    | 3               | 3-D                                   | 1     | 0.9771   | 1.15      | 0.984              |
| 5IG9    | 3               | 4-D                                   | 4     | 0.9728   | 1.23      | 0.984              |
| 5IG9    | 3               | 5-D                                   | 2     | 0.9780   | 1.14      | 0.984              |
| 5IG9    | 3               | 1-E                                   | 5     | 0.9450   | 3.72      | 0.984              |
| 5IG9    | 3               | 2-E                                   | 3     | 0.9515   | 3.67      | 0.984              |
| 5IG9    | 3               | 3-E                                   | 1     | 0.9511   | 3.68      | 0.984              |
| 5IG9    | 3               | 4-E                                   | 4     | 0.9487   | 3.69      | 0.984              |
| 5IG9    | 3               | 5-E                                   | 2     | 0.9521   | 3.68      | 0.984              |
| 5IG9    | 3               | 1-F                                   | 5     | 0.9722   | 1.29      | 0.983              |
| 5IG9    | 3               | 2-F                                   | 3     | 0.9783   | 1.16      | 0.983              |
| 5IG9    | 3               | 3-F                                   | 1     | 0.9791   | 1.16      | 0.983              |
| 5IG9    | 3               | 4-F                                   | 4     | 0.9760   | 1.21      | 0.983              |
| 5IG9    | 3               | 5-F                                   | 2     | 0.9800   | 1.14      | 0.983              |
| 5IG9    | 3               | 1-G                                   | 5     | 0.9472   | 3.71      | 0.984              |
| 5IG9    | 3               | 2-G                                   | 3     | 0.9528   | 3.67      | 0.984              |
| 5IG9    | 3               | 3-G                                   | 1     | 0.9530   | 3.67      | 0.984              |
| 5IG9    | 3               | 4-G                                   | 4     | 0.9507   | 3.68      | 0.984              |
| 5IG9    | 3               | 5-G                                   | 2     | 0.9543   | 3.67      | 0.984              |
| 5IG9    | 3               | 1-H                                   | 5     | 0.9634   | 1.30      | 0.981              |
| 5IG9    | 3               | 2-H                                   | 3     | 0.9698   | 1.14      | 0.981              |
| 5IG9    | 3               | 3-H                                   | 1     | 0.9710   | 1.12      | 0.981              |
| 5IG9    | 3               | 4-H                                   | 4     | 0.9654   | 1.27      | 0.981              |
| 5IG9    | 3               | 5-H                                   | 2     | 0.9729   | 1.07      | 0.981              |
| 7DRM    | 3               | 1-A                                   | 5     | 0.9384   | 2.57      | 1.000              |
| 7DRM    | 3               | 2-A                                   | 3     | 0.9438   | 2.47      | 1.000              |
| 7DRM    | 3               | 3-A                                   | 1     | 0.9474   | 2.44      | 1.000              |
| 7DRM    | 3               | 4-A                                   | 2     | 0.9311   | 2.68      | 1.000              |
| 7DRM    | 3               | 5-A                                   | 4     | 0.9242   | 2.68      | 1.000              |
| 7DRM    | 3               | 1-B                                   | 5     | 0.9551   | 1.54      | 1.000              |
| 7DRM    | 3               | 2-B                                   | 3     | 0.9542   | 1.55      | 1.000              |
| 7DRM    | 3               | 3-B                                   | 1     | 0.9559   | 1.51      | 1.000              |
| 7DRM    | 3               | 4-B                                   | 2     | 0.9464   | 1.75      | 1.000              |
| 7DRM    | 3               | 5-B                                   | 4     | 0.9501   | 1.65      | 1.000              |
| 7DRM    | 3               | 1-C                                   | 5     | 0.9364   | 2.57      | 1.000              |
| 7DRM    | 3               | 2-C                                   | 3     | 0.9418   | 2.47      | 1.000              |
| 7DRM    | 3               | 3-C                                   | 1     | 0.9461   | 2.43      | 1.000              |
| 7DRM    | 3               | 4-C                                   | 2     | 0.9296   | 2.66      | 1.000              |
| 7DRM    | 3               | 5-C                                   | 4     | 0.9220   | 2.68      | 1.000              |

| PDB ID: | Recycle Number: | Model Number and PDB Reference Chain: | Rank: | TMscore: | RMSD (Å): | Sequence Identity: |
|---------|-----------------|---------------------------------------|-------|----------|-----------|--------------------|
| 7DRM    | 3               | 1-D                                   | 5     | 0.9243   | 2.93      | 0.994              |
| 7DRM    | 3               | 2-D                                   | 3     | 0.9248   | 2.88      | 0.994              |
| 7DRM    | 3               | 3-D                                   | 1     | 0.9261   | 2.90      | 0.994              |
| 7DRM    | 3               | 4-D                                   | 2     | 0.9150   | 3.07      | 0.994              |
| 7DRM    | 3               | 5-D                                   | 4     | 0.9173   | 2.99      | 0.994              |
| 7M4S    | 3               | 1-A                                   | 5     | 0.9124   | 2.91      | 1.000              |
| 7M4S    | 3               | 2-A                                   | 2     | 0.9135   | 2.88      | 1.000              |
| 7M4S    | 3               | 3-A                                   | 1     | 0.9177   | 2.83      | 1.000              |
| 7M4S    | 3               | 4-A                                   | 3     | 0.9115   | 2.94      | 1.000              |
| 7M4S    | 3               | 5-A                                   | 4     | 0.9116   | 2.98      | 1.000              |
| 7M4S    | 3               | 1-B                                   | 5     | 0.9129   | 2.69      | 1.000              |
| 7M4S    | 3               | 2-B                                   | 2     | 0.9143   | 2.68      | 1.000              |
| 7M4S    | 3               | 3-B                                   | 1     | 0.9166   | 2.64      | 1.000              |
| 7M4S    | 3               | 4-B                                   | 3     | 0.9113   | 2.75      | 1.000              |
| 7M4S    | 3               | 5-B                                   | 4     | 0.9108   | 2.75      | 1.000              |
| 7M4S    | 3               | 1-C                                   | 5     | 0.9192   | 3.49      | 1.000              |
| 7M4S    | 3               | 2-C                                   | 2     | 0.9209   | 3.49      | 1.000              |
| 7M4S    | 3               | 3-C                                   | 1     | 0.9220   | 3.44      | 1.000              |
| 7M4S    | 3               | 4-C                                   | 3     | 0.9173   | 3.54      | 1.000              |
| 7M4S    | 3               | 5-C                                   | 4     | 0.9154   | 3.58      | 1.000              |
| 7M4S    | 3               | 1-D                                   | 5     | 0.9283   | 3.97      | 1.000              |
| 7M4S    | 3               | 2-D                                   | 2     | 0.9314   | 3.97      | 1.000              |
| 7M4S    | 3               | 3-D                                   | 1     | 0.9335   | 3.91      | 1.000              |
| 7M4S    | 3               | 4-D                                   | 3     | 0.9274   | 4.00      | 1.000              |
| 7M4S    | 3               | 5-D                                   | 4     | 0.9272   | 4.03      | 1.000              |
| 7MGV    | 3               | 1-A                                   | 3     | 0.9214   | 4.16      | 1.000              |
| 7MGV    | 3               | 2-A                                   | 5     | 0.9180   | 4.20      | 1.000              |
| 7MGV    | 3               | 3-A                                   | 1     | 0.9247   | 4.08      | 1.000              |
| 7MGV    | 3               | 4-A                                   | 4     | 0.9229   | 4.31      | 1.000              |
| 7MGV    | 3               | 5-A                                   | 2     | 0.9245   | 4.13      | 1.000              |
| 7MGV    | 3               | 1-B                                   | 3     | 0.9768   | 1.06      | 1.000              |
| 7MGV    | 3               | 2-B                                   | 5     | 0.9741   | 1.12      | 1.000              |
| 7MGV    | 3               | 3-B                                   | 1     | 0.9813   | 0.94      | 1.000              |
| 7MGV    | 3               | 4-B                                   | 4     | 0.9619   | 1.58      | 1.000              |
| 7MGV    | 3               | 5-B                                   | 2     | 0.9818   | 0.93      | 1.000              |
| 3VPB    | 12              | 1-A                                   | 4     | 0.9898   | 0.64      | 1.000              |
| 3VPB    | 12              | 2-A                                   | 5     | 0.9895   | 0.65      | 1.000              |
| 3VPB    | 12              | 3-A                                   | 1     | 0.9915   | 0.58      | 1.000              |
| 3VPB    | 12              | 4-A                                   | 3     | 0.9901   | 0.63      | 1.000              |
| 3VPB    | 12              | 5-A                                   | 2     | 0.9886   | 0.68      | 1.000              |
| 3VPB    | 12              | 1-B                                   | 4     | 0.9894   | 0.65      | 1.000              |
| 3VPB    | 12              | 2-B                                   | 5     | 0.9889   | 0.67      | 1.000              |
| 3VPB    | 12              | 3-B                                   | 1     | 0.9909   | 0.60      | 1.000              |
| 3VPB    | 12              | 4-B                                   | 3     | 0.9895   | 0.65      | 1.000              |
| 3VPB    | 12              | 5-B                                   | 2     | 0.9880   | 0.70      | 1.000              |
| 3VPB    | 12              | 1-C                                   | 4     | 0.9926   | 0.54      | 1.000              |
| 3VPB    | 12              | 2-C                                   | 5     | 0.9937   | 0.49      | 1.000              |
| 3VPB    | 12              | 3-C                                   | 1     | 0.9935   | 0.50      | 1.000              |
| 3VPB    | 12              | 4-C                                   | 3     | 0.9944   | 0.47      | 1.000              |
| 3VPB    | 12              | 5-C                                   | 2     | 0.9916   | 0.58      | 1.000              |
| 3VPB    | 12              | 1-D                                   | 4     | 0.9929   | 0.53      | 1.000              |
| 3VPB    | 12              | 2-D                                   | 5     | 0.9940   | 0.48      | 1.000              |
| 3VPB    | 12              | 3-D                                   | 1     | 0.9939   | 0.49      | 1.000              |
| 3VPB    | 12              | 4-D                                   | 3     | 0.9946   | 0.46      | 1.000              |
| 3VPB    | 12              | 5-D                                   | 2     | 0.9918   | 0.57      | 1.000              |
| 3VPD    | 12              | 1-A                                   | 5     | 0.9818   | 0.89      | 1.000              |
| 3VPD    | 12              | 2-A                                   | 4     | 0.9822   | 0.88      | 1.000              |
| 3VPD    | 12              | 3-A                                   | 1     | 0.9802   | 0.93      | 1.000              |
| 3VPD    | 12              | 4-A                                   | 2     | 0.9829   | 0.86      | 1.000              |
| 3VPD    | 12              | 5-A                                   | 3     | 0.9806   | 0.92      | 1.000              |
| 3VPD    | 12              | 1-B                                   | 5     | 0.9872   | 0.72      | 1.000              |
| 3VPD    | 12              | 2-B                                   | 4     | 0.9884   | 0.69      | 1.000              |
| 3VPD    | 12              | 3-B                                   | 1     | 0.9878   | 0.72      | 1.000              |
| 3VPD    | 12              | 4-B                                   | 2     | 0.9881   | 0.71      | 1.000              |

| PDB ID: | Recycle Number: | Model Number and PDB Reference Chain: | Rank: | TMscore: | RMSD (Å): | Sequence Identity: |
|---------|-----------------|---------------------------------------|-------|----------|-----------|--------------------|
| 3VPD    | 12              | 5-B                                   | 3     | 0.9864   | 0.74      | 1.000              |
| 5IG8    | 12              | 1-A                                   | 5     | 0.8858   | 3.76      | 1.000              |
| 5IG8    | 12              | 2-A                                   | 4     | 0.8895   | 3.41      | 1.000              |
| 5IG8    | 12              | 3-A                                   | 1     | 0.8831   | 3.91      | 1.000              |
| 5IG8    | 12              | 4-A                                   | 3     | 0.8816   | 3.94      | 1.000              |
| 5IG8    | 12              | 5-A                                   | 2     | 0.8868   | 3.72      | 1.000              |
| 5IG8    | 12              | 1-B                                   | 5     | 0.9814   | 0.81      | 1.000              |
| 5IG8    | 12              | 2-B                                   | 4     | 0.9825   | 0.78      | 1.000              |
| 5IG8    | 12              | 3-B                                   | 1     | 0.9813   | 0.81      | 1.000              |
| 5IG8    | 12              | 4-B                                   | 3     | 0.9798   | 0.84      | 1.000              |
| 5IG8    | 12              | 5-B                                   | 2     | 0.9804   | 0.83      | 1.000              |
| 5IG9    | 12              | 1-A                                   | 5     | 0.9431   | 3.96      | 0.981              |
| 5IG9    | 12              | 2-A                                   | 4     | 0.9473   | 3.93      | 0.981              |
| 5IG9    | 12              | 3-A                                   | 1     | 0.9431   | 3.96      | 0.981              |
| 5IG9    | 12              | 4-A                                   | 3     | 0.9369   | 4.03      | 0.981              |
| 5IG9    | 12              | 5-A                                   | 2     | 0.9481   | 3.94      | 0.981              |
| 5IG9    | 12              | 1-B                                   | 5     | 0.9617   | 1.43      | 0.980              |
| 5IG9    | 12              | 2-B                                   | 4     | 0.9727   | 1.21      | 0.980              |
| 5IG9    | 12              | 3-B                                   | 1     | 0.9709   | 1.26      | 0.980              |
| 5IG9    | 12              | 4-B                                   | 3     | 0.9639   | 1.41      | 0.980              |
| 5IG9    | 12              | 5-B                                   | 2     | 0.9764   | 1.13      | 0.980              |
| 5IG9    | 12              | 1-C                                   | 5     | 0.9464   | 3.32      | 0.984              |
| 5IG9    | 12              | 2-C                                   | 4     | 0.9567   | 3.24      | 0.984              |
| 5IG9    | 12              | 3-C                                   | 1     | 0.9540   | 3.26      | 0.984              |
| 5IG9    | 12              | 4-C                                   | 3     | 0.9501   | 3.31      | 0.984              |
| 5IG9    | 12              | 5-C                                   | 2     | 0.9577   | 3.25      | 0.984              |
| 5IG9    | 12              | 1-D                                   | 5     | 0.9666   | 1.36      | 0.984              |
| 5IG9    | 12              | 2-D                                   | 4     | 0.9774   | 1.14      | 0.984              |
| 5IG9    | 12              | 3-D                                   | 1     | 0.9756   | 1.19      | 0.984              |
| 5IG9    | 12              | 4-D                                   | 3     | 0.9691   | 1.31      | 0.984              |
| 5IG9    | 12              | 5-D                                   | 2     | 0.9801   | 1.08      | 0.984              |
| 5IG9    | 12              | 1-E                                   | 5     | 0.9422   | 3.76      | 0.984              |
| 5IG9    | 12              | 2-E                                   | 4     | 0.9526   | 3.67      | 0.984              |
| 5IG9    | 12              | 3-E                                   | 1     | 0.9499   | 3.69      | 0.984              |
| 5IG9    | 12              | 4-E                                   | 3     | 0.9463   | 3.74      | 0.984              |
| 5IG9    | 12              | 5-E                                   | 2     | 0.9537   | 3.68      | 0.984              |
| 5IG9    | 12              | 1-F                                   | 5     | 0.9694   | 1.35      | 0.983              |
| 5IG9    | 12              | 2-F                                   | 4     | 0.9795   | 1.14      | 0.983              |
| 5IG9    | 12              | 3-F                                   | 1     | 0.9780   | 1.18      | 0.983              |
| 5IG9    | 12              | 4-F                                   | 3     | 0.9731   | 1.27      | 0.983              |
| 5IG9    | 12              | 5-F                                   | 2     | 0.9820   | 1.09      | 0.983              |
| 5IG9    | 12              | 1-G                                   | 5     | 0.9445   | 3.75      | 0.984              |
| 5IG9    | 12              | 2-G                                   | 4     | 0.9539   | 3.67      | 0.984              |
| 5IG9    | 12              | 3-G                                   | 1     | 0.9519   | 3.69      | 0.984              |
| 5IG9    | 12              | 4-G                                   | 3     | 0.9481   | 3.73      | 0.984              |
| 5IG9    | 12              | 5-G                                   | 2     | 0.9557   | 3.68      | 0.984              |
| 5IG9    | 12              | 1-H                                   | 5     | 0.9599   | 1.37      | 0.981              |
| 5IG9    | 12              | 2-H                                   | 4     | 0.9704   | 1.13      | 0.981              |
| 5IG9    | 12              | 3-H                                   | 1     | 0.9693   | 1.16      | 0.981              |
| 5IG9    | 12              | 4-H                                   | 3     | 0.9625   | 1.34      | 0.981              |
| 5IG9    | 12              | 5-H                                   | 2     | 0.9748   | 1.02      | 0.981              |
| 7DRM    | 12              | 1-A                                   | 4     | 0.9287   | 2.69      | 1.000              |
| 7DRM    | 12              | 2-A                                   | 3     | 0.9404   | 2.53      | 1.000              |
| 7DRM    | 12              | 3-A                                   | 1     | 0.9445   | 2.49      | 1.000              |
| 7DRM    | 12              | 4-A                                   | 2     | 0.9264   | 2.77      | 1.000              |
| 7DRM    | 12              | 5-A                                   | 5     | 0.9166   | 2.77      | 1.000              |
| 7DRM    | 12              | 1-B                                   | 4     | 0.9524   | 1.59      | 1.000              |
| 7DRM    | 12              | 2-B                                   | 3     | 0.9520   | 1.58      | 1.000              |
| 7DRM    | 12              | 3-B                                   | 1     | 0.9567   | 1.51      | 1.000              |
| 7DRM    | 12              | 4-B                                   | 2     | 0.9422   | 1.86      | 1.000              |
| 7DRM    | 12              | 5-B                                   | 5     | 0.9454   | 1.73      | 1.000              |
| 7DRM    | 12              | 1-C                                   | 4     | 0.9266   | 2.69      | 1.000              |
| 7DRM    | 12              | 2-C                                   | 3     | 0.9383   | 2.53      | 1.000              |
| 7DRM    | 12              | 3-C                                   | 1     | 0.9431   | 2.48      | 1.000              |

| PDB ID: | Recycle Number: | Model Number and PDB Reference Chain: | Rank: | TMscore: | RMSD (Å): | Sequence Identity: |
|---------|-----------------|---------------------------------------|-------|----------|-----------|--------------------|
| 7DRM    | 12              | 4-C                                   | 2     | 0.9249   | 2.73      | 1.000              |
| 7DRM    | 12              | 5-C                                   | 5     | 0.9144   | 2.77      | 1.000              |
| 7DRM    | 12              | 1-D                                   | 4     | 0.9198   | 3.00      | 0.994              |
| 7DRM    | 12              | 2-D                                   | 3     | 0.9216   | 2.94      | 0.994              |
| 7DRM    | 12              | 3-D                                   | 1     | 0.9260   | 2.92      | 0.994              |
| 7DRM    | 12              | 4-D                                   | 2     | 0.9104   | 3.15      | 0.994              |
| 7DRM    | 12              | 5-D                                   | 5     | 0.9122   | 3.06      | 0.994              |
| 7M4S    | 12              | 1-A                                   | 5     | 0.9182   | 2.85      | 1.000              |
| 7M4S    | 12              | 2-A                                   | 2     | 0.9159   | 2.87      | 1.000              |
| 7M4S    | 12              | 3-A                                   | 1     | 0.9187   | 2.84      | 1.000              |
| 7M4S    | 12              | 4-A                                   | 3     | 0.9169   | 2.83      | 1.000              |
| 7M4S    | 12              | 5-A                                   | 4     | 0.9189   | 2.78      | 1.000              |
| 7M4S    | 12              | 1-B                                   | 5     | 0.9199   | 2.60      | 1.000              |
| 7M4S    | 12              | 2-B                                   | 2     | 0.9176   | 2.65      | 1.000              |
| 7M4S    | 12              | 3-B                                   | 1     | 0.9196   | 2.59      | 1.000              |
| 7M4S    | 12              | 4-B                                   | 3     | 0.9162   | 2.65      | 1.000              |
| 7M4S    | 12              | 5-B                                   | 4     | 0.9198   | 2.55      | 1.000              |
| 7M4S    | 12              | 1-C                                   | 5     | 0.9231   | 3.52      | 1.000              |
| 7M4S    | 12              | 2-C                                   | 2     | 0.9227   | 3.52      | 1.000              |
| 7M4S    | 12              | 3-C                                   | 1     | 0.9227   | 3.46      | 1.000              |
| 7M4S    | 12              | 4-C                                   | 3     | 0.9205   | 3.53      | 1.000              |
| 7M4S    | 12              | 5-C                                   | 4     | 0.9198   | 3.56      | 1.000              |
| 7M4S    | 12              | 1-D                                   | 5     | 0.9326   | 4.01      | 1.000              |
| 7M4S    | 12              | 2-D                                   | 2     | 0.9323   | 4.01      | 1.000              |
| 7M4S    | 12              | 3-D                                   | 1     | 0.9333   | 3.94      | 1.000              |
| 7M4S    | 12              | 4-D                                   | 3     | 0.9304   | 4.01      | 1.000              |
| 7M4S    | 12              | 5-D                                   | 4     | 0.9331   | 4.01      | 1.000              |
| 7MGV    | 12              | 1-A                                   | 4     | 0.9230   | 4.16      | 1.000              |
| 7MGV    | 12              | 2-A                                   | 5     | 0.9196   | 4.19      | 1.000              |
| 7MGV    | 12              | 3-A                                   | 1     | 0.9247   | 4.09      | 1.000              |
| 7MGV    | 12              | 4-A                                   | 3     | 0.9245   | 4.28      | 1.000              |
| 7MGV    | 12              | 5-A                                   | 2     | 0.9264   | 4.12      | 1.000              |
| 7MGV    | 12              | 1-B                                   | 4     | 0.9788   | 1.01      | 1.000              |
| 7MGV    | 12              | 2-B                                   | 5     | 0.9754   | 1.09      | 1.000              |
| 7MGV    | 12              | 3-B                                   | 1     | 0.9814   | 0.94      | 1.000              |
| 7MGV    | 12              | 4-B                                   | 3     | 0.9618   | 1.63      | 1.000              |
| 7MGV    | 12              | 5-B                                   | 2     | 0.9838   | 0.87      | 1.000              |
| 3VPB    | 24              | 1-A                                   | 4     | 0.9897   | 0.64      | 1.000              |
| 3VPB    | 24              | 2-A                                   | 5     | 0.9897   | 0.64      | 1.000              |
| 3VPB    | 24              | 3-A                                   | 1     | 0.9914   | 0.58      | 1.000              |
| 3VPB    | 24              | 4-A                                   | 3     | 0.9903   | 0.62      | 1.000              |
| 3VPB    | 24              | 5-A                                   | 2     | 0.9886   | 0.67      | 1.000              |
| 3VPB    | 24              | 1-B                                   | 4     | 0.9893   | 0.65      | 1.000              |
| 3VPB    | 24              | 2-B                                   | 5     | 0.9892   | 0.66      | 1.000              |
| 3VPB    | 24              | 3-B                                   | 1     | 0.9909   | 0.60      | 1.000              |
| 3VPB    | 24              | 4-B                                   | 3     | 0.9898   | 0.64      | 1.000              |
| 3VPB    | 24              | 5-B                                   | 2     | 0.9881   | 0.70      | 1.000              |
| 3VPB    | 24              | 1-C                                   | 4     | 0.9928   | 0.53      | 1.000              |
| 3VPB    | 24              | 2-C                                   | 5     | 0.9937   | 0.50      | 1.000              |
| 3VPB    | 24              | 3-C                                   | 1     | 0.9936   | 0.50      | 1.000              |
| 3VPB    | 24              | 4-C                                   | 3     | 0.9944   | 0.47      | 1.000              |
| 3VPB    | 24              | 5-C                                   | 2     | 0.9918   | 0.57      | 1.000              |
| 3VPB    | 24              | 1-D                                   | 4     | 0.9931   | 0.52      | 1.000              |
| 3VPB    | 24              | 2-D                                   | 5     | 0.9940   | 0.48      | 1.000              |
| 3VPB    | 24              | 3-D                                   | 1     | 0.9939   | 0.49      | 1.000              |
| 3VPB    | 24              | 4-D                                   | 3     | 0.9945   | 0.46      | 1.000              |
| 3VPB    | 24              | 5-D                                   | 2     | 0.9920   | 0.56      | 1.000              |
| 3VPD    | 24              | 1-A                                   | 5     | 0.9824   | 0.88      | 1.000              |
| 3VPD    | 24              | 2-A                                   | 4     | 0.9824   | 0.88      | 1.000              |
| 3VPD    | 24              | 3-A                                   | 1     | 0.9807   | 0.91      | 1.000              |
| 3VPD    | 24              | 4-A                                   | 2     | 0.9829   | 0.86      | 1.000              |
| 3VPD    | 24              | 5-A                                   | 3     | 0.9812   | 0.91      | 1.000              |
| 3VPD    | 24              | 1-B                                   | 5     | 0.9874   | 0.71      | 1.000              |
| 3VPD    | 24              | 2-B                                   | 4     | 0.9881   | 0.70      | 1.000              |

| PDB ID: | Recycle Number: | Model Number and PDB Reference Chain: | Rank: | TMscore: | RMSD (Å): | Sequence Identity: |
|---------|-----------------|---------------------------------------|-------|----------|-----------|--------------------|
| 3VPD    | 24              | 3-B                                   | 1     | 0.9878   | 0.72      | 1.000              |
| 3VPD    | 24              | 4-B                                   | 2     | 0.9883   | 0.70      | 1.000              |
| 3VPD    | 24              | 5-B                                   | 3     | 0.9866   | 0.74      | 1.000              |
| 5IG8    | 24              | 1-A                                   | 5     | 0.8856   | 3.78      | 1.000              |
| 5IG8    | 24              | 2-A                                   | 3     | 0.8913   | 3.35      | 1.000              |
| 5IG8    | 24              | 3-A                                   | 1     | 0.8832   | 3.95      | 1.000              |
| 5IG8    | 24              | 4-A                                   | 4     | 0.8796   | 3.97      | 1.000              |
| 5IG8    | 24              | 5-A                                   | 2     | 0.8876   | 3.65      | 1.000              |
| 5IG8    | 24              | 1-B                                   | 5     | 0.9814   | 0.81      | 1.000              |
| 5IG8    | 24              | 2-B                                   | 3     | 0.9814   | 0.81      | 1.000              |
| 5IG8    | 24              | 3-B                                   | 1     | 0.9814   | 0.81      | 1.000              |
| 5IG8    | 24              | 4-B                                   | 4     | 0.9789   | 0.86      | 1.000              |
| 5IG8    | 24              | 5-B                                   | 2     | 0.9810   | 0.82      | 1.000              |
| 5IG9    | 24              | 1-A                                   | 5     | 0.9339   | 4.04      | 0.981              |
| 5IG9    | 24              | 2-A                                   | 4     | 0.9459   | 3.94      | 0.981              |
| 5IG9    | 24              | 3-A                                   | 2     | 0.9432   | 3.96      | 0.981              |
| 5IG9    | 24              | 4-A                                   | 3     | 0.9365   | 4.04      | 0.981              |
| 5IG9    | 24              | 5-A                                   | 1     | 0.9470   | 3.95      | 0.981              |
| 5IG9    | 24              | 1-B                                   | 5     | 0.9604   | 1.46      | 0.980              |
| 5IG9    | 24              | 2-B                                   | 4     | 0.9715   | 1.23      | 0.980              |
| 5IG9    | 24              | 3-B                                   | 2     | 0.9713   | 1.26      | 0.980              |
| 5IG9    | 24              | 4-B                                   | 3     | 0.9637   | 1.42      | 0.980              |
| 5IG9    | 24              | 5-B                                   | 1     | 0.9756   | 1.15      | 0.980              |
| 5IG9    | 24              | 1-C                                   | 5     | 0.9451   | 3.34      | 0.984              |
| 5IG9    | 24              | 2-C                                   | 4     | 0.9558   | 3.25      | 0.984              |
| 5IG9    | 24              | 3-C                                   | 2     | 0.9545   | 3.26      | 0.984              |
| 5IG9    | 24              | 4-C                                   | 3     | 0.9498   | 3.31      | 0.984              |
| 5IG9    | 24              | 5-C                                   | 1     | 0.9574   | 3.26      | 0.984              |
| 5IG9    | 24              | 1-D                                   | 5     | 0.9653   | 1.39      | 0.984              |
| 5IG9    | 24              | 2-D                                   | 4     | 0.9764   | 1.16      | 0.984              |
| 5IG9    | 24              | 3-D                                   | 2     | 0.9760   | 1.18      | 0.984              |
| 5IG9    | 24              | 4-D                                   | 3     | 0.9688   | 1.32      | 0.984              |
| 5IG9    | 24              | 5-D                                   | 1     | 0.9796   | 1.10      | 0.984              |
| 5IG9    | 24              | 1-E                                   | 5     | 0.9408   | 3.77      | 0.984              |
| 5IG9    | 24              | 2-E                                   | 4     | 0.9518   | 3.68      | 0.984              |
| 5IG9    | 24              | 3-E                                   | 2     | 0.9504   | 3.69      | 0.984              |
| 5IG9    | 24              | 4-E                                   | 3     | 0.9458   | 3.74      | 0.984              |
| 5IG9    | 24              | 5-E                                   | 1     | 0.9533   | 3.69      | 0.984              |
| 5IG9    | 24              | 1-F                                   | 5     | 0.9681   | 1.37      | 0.983              |
| 5IG9    | 24              | 2-F                                   | 4     | 0.9787   | 1.16      | 0.983              |
| 5IG9    | 24              | 3-F                                   | 2     | 0.9786   | 1.17      | 0.983              |
| 5IG9    | 24              | 4-F                                   | 3     | 0.9728   | 1.28      | 0.983              |
| 5IG9    | 24              | 5-F                                   | 1     | 0.9818   | 1.10      | 0.983              |
| 5IG9    | 24              | 1-G                                   | 5     | 0.9433   | 3.76      | 0.984              |
| 5IG9    | 24              | 2-G                                   | 4     | 0.9532   | 3.68      | 0.984              |
| 5IG9    | 24              | 3-G                                   | 2     | 0.9525   | 3.68      | 0.984              |
| 5IG9    | 24              | 4-G                                   | 3     | 0.9478   | 3.74      | 0.984              |
| 5IG9    | 24              | 5-G                                   | 1     | 0.9554   | 3.68      | 0.984              |
| 5IG9    | 24              | 1-H                                   | 5     | 0.9590   | 1.39      | 0.981              |
| 5IG9    | 24              | 2-H                                   | 4     | 0.9691   | 1.16      | 0.981              |
| 5IG9    | 24              | 3-H                                   | 2     | 0.9697   | 1.16      | 0.981              |
| 5IG9    | 24              | 4-H                                   | 3     | 0.9624   | 1.34      | 0.981              |
| 5IG9    | 24              | 5-H                                   | 1     | 0.9742   | 1.04      | 0.981              |
| 7DRM    | 24              | 1-A                                   | 4     | 0.9260   | 2.73      | 1.000              |
| 7DRM    | 24              | 2-A                                   | 3     | 0.9373   | 2.57      | 1.000              |
| 7DRM    | 24              | 3-A                                   | 1     | 0.9442   | 2.51      | 1.000              |
| 7DRM    | 24              | 4-A                                   | 2     | 0.9238   | 2.80      | 1.000              |
| 7DRM    | 24              | 5-A                                   | 5     | 0.9093   | 2.86      | 1.000              |
| 7DRM    | 24              | 1-B                                   | 4     | 0.9517   | 1.60      | 1.000              |
| 7DRM    | 24              | 2-B                                   | 3     | 0.9546   | 1.53      | 1.000              |
| 7DRM    | 24              | 3-B                                   | 1     | 0.9566   | 1.52      | 1.000              |
| 7DRM    | 24              | 4-B                                   | 2     | 0.9421   | 1.86      | 1.000              |
| 7DRM    | 24              | 5-B                                   | 5     | 0.9417   | 1.80      | 1.000              |
| 7DRM    | 24              | 1-C                                   | 4     | 0.9240   | 2.72      | 1.000              |

| PDB ID: | Recycle Number: | Model Number and PDB Reference Chain: | Rank: | TMscore: | RMSD (Å): | Sequence Identity: |
|---------|-----------------|---------------------------------------|-------|----------|-----------|--------------------|
| 7DRM    | 24              | 2-C                                   | 3     | 0.9352   | 2.57      | 1.000              |
| 7DRM    | 24              | 3-C                                   | 1     | 0.9428   | 2.50      | 1.000              |
| 7DRM    | 24              | 4-C                                   | 2     | 0.9224   | 2.77      | 1.000              |
| 7DRM    | 24              | 5-C                                   | 5     | 0.9071   | 2.86      | 1.000              |
| 7DRM    | 24              | 1-D                                   | 4     | 0.9188   | 3.02      | 0.994              |
| 7DRM    | 24              | 2-D                                   | 3     | 0.9231   | 2.93      | 0.994              |
| 7DRM    | 24              | 3-D                                   | 1     | 0.9259   | 2.93      | 0.994              |
| 7DRM    | 24              | 4-D                                   | 2     | 0.9099   | 3.15      | 0.994              |
| 7DRM    | 24              | 5-D                                   | 5     | 0.9079   | 3.11      | 0.994              |
| 7M4S    | 24              | 1-A                                   | 5     | 0.9179   | 2.87      | 1.000              |
| 7M4S    | 24              | 2-A                                   | 2     | 0.9162   | 2.88      | 1.000              |
| 7M4S    | 24              | 3-A                                   | 1     | 0.9192   | 2.88      | 1.000              |
| 7M4S    | 24              | 4-A                                   | 3     | 0.9168   | 2.87      | 1.000              |
| 7M4S    | 24              | 5-A                                   | 4     | 0.9183   | 2.76      | 1.000              |
| 7M4S    | 24              | 1-B                                   | 5     | 0.9204   | 2.60      | 1.000              |
| 7M4S    | 24              | 2-B                                   | 2     | 0.9181   | 2.65      | 1.000              |
| 7M4S    | 24              | 3-B                                   | 1     | 0.9207   | 2.61      | 1.000              |
| 7M4S    | 24              | 4-B                                   | 3     | 0.9168   | 2.67      | 1.000              |
| 7M4S    | 24              | 5-B                                   | 4     | 0.9202   | 2.53      | 1.000              |
| 7M4S    | 24              | 1-C                                   | 5     | 0.9225   | 3.54      | 1.000              |
| 7M4S    | 24              | 2-C                                   | 2     | 0.9226   | 3.53      | 1.000              |
| 7M4S    | 24              | 3-C                                   | 1     | 0.9232   | 3.48      | 1.000              |
| 7M4S    | 24              | 4-C                                   | 3     | 0.9202   | 3.56      | 1.000              |
| 7M4S    | 24              | 5-C                                   | 4     | 0.9186   | 3.57      | 1.000              |
| 7M4S    | 24              | 1-D                                   | 5     | 0.9320   | 4.03      | 1.000              |
| 7M4S    | 24              | 2-D                                   | 2     | 0.9323   | 4.02      | 1.000              |
| 7M4S    | 24              | 3-D                                   | 1     | 0.9336   | 3.97      | 1.000              |
| 7M4S    | 24              | 4-D                                   | 3     | 0.9302   | 4.03      | 1.000              |
| 7M4S    | 24              | 5-D                                   | 4     | 0.9319   | 4.01      | 1.000              |
| 7MGV    | 24              | 1-A                                   | 3     | 0.9235   | 4.15      | 1.000              |
| 7MGV    | 24              | 2-A                                   | 5     | 0.9204   | 4.19      | 1.000              |
| 7MGV    | 24              | 3-A                                   | 1     | 0.9254   | 4.08      | 1.000              |
| 7MGV    | 24              | 4-A                                   | 4     | 0.9247   | 4.29      | 1.000              |
| 7MGV    | 24              | 5-A                                   | 2     | 0.9280   | 4.04      | 1.000              |
| 7MGV    | 24              | 1-B                                   | 3     | 0.9796   | 0.99      | 1.000              |
| 7MGV    | 24              | 2-B                                   | 5     | 0.9765   | 1.06      | 1.000              |
| 7MGV    | 24              | 3-B                                   | 1     | 0.9822   | 0.92      | 1.000              |
| 7MGV    | 24              | 4-B                                   | 4     | 0.9622   | 1.62      | 1.000              |
| 7MGV    | 24              | 5-B                                   | 2     | 0.9833   | 0.89      | 1.000              |
| 3VPB    | 48              | 1-A                                   | 3     | 0.9903   | 0.62      | 1.000              |
| 3VPB    | 48              | 2-A                                   | 5     | 0.9901   | 0.62      | 1.000              |
| 3VPB    | 48              | 3-A                                   | 1     | 0.9914   | 0.58      | 1.000              |
| 3VPB    | 48              | 4-A                                   | 4     | 0.9899   | 0.63      | 1.000              |
| 3VPB    | 48              | 5-A                                   | 2     | 0.9899   | 0.63      | 1.000              |
| 3VPB    | 48              | 1-B                                   | 3     | 0.9897   | 0.64      | 1.000              |
| 3VPB    | 48              | 2-B                                   | 5     | 0.9895   | 0.65      | 1.000              |
| 3VPB    | 48              | 3-B                                   | 1     | 0.9907   | 0.61      | 1.000              |
| 3VPB    | 48              | 4-B                                   | 4     | 0.9892   | 0.66      | 1.000              |
| 3VPB    | 48              | 5-B                                   | 2     | 0.9892   | 0.66      | 1.000              |
| 3VPB    | 48              | 1-C                                   | 3     | 0.9933   | 0.51      | 1.000              |
| 3VPB    | 48              | 2-C                                   | 5     | 0.9946   | 0.46      | 1.000              |
| 3VPB    | 48              | 3-C                                   | 1     | 0.9936   | 0.50      | 1.000              |
| 3VPB    | 48              | 4-C                                   | 4     | 0.9945   | 0.47      | 1.000              |
| 3VPB    | 48              | 5-C                                   | 2     | 0.9932   | 0.52      | 1.000              |
| 3VPB    | 48              | 1-D                                   | 3     | 0.9935   | 0.51      | 1.000              |
| 3VPB    | 48              | 2-D                                   | 5     | 0.9948   | 0.45      | 1.000              |
| 3VPB    | 48              | 3-D                                   | 1     | 0.9939   | 0.49      | 1.000              |
| 3VPB    | 48              | 4-D                                   | 4     | 0.9945   | 0.46      | 1.000              |
| 3VPB    | 48              | 5-D                                   | 2     | 0.9934   | 0.51      | 1.000              |
| 3VPD    | 48              | 1-A                                   | 5     | 0.9813   | 0.90      | 1.000              |
| 3VPD    | 48              | 2-A                                   | 4     | 0.9815   | 0.90      | 1.000              |
| 3VPD    | 48              | 3-A                                   | 1     | 0.9796   | 0.94      | 1.000              |
| 3VPD    | 48              | 4-A                                   | 2     | 0.9823   | 0.88      | 1.000              |
| 3VPD    | 48              | 5-A                                   | 3     | 0.9811   | 0.91      | 1.000              |



| PDB ID: | Recycle Number: | Model Number and PDB Reference Chain: | Rank: | TMscore: | RMSD (Å): | Sequence Identity: |
|---------|-----------------|---------------------------------------|-------|----------|-----------|--------------------|
| 3VPD    | 48              | 1-B                                   | 5     | 0.9869   | 0.73      | 1.000              |
| 3VPD    | 48              | 2-B                                   | 4     | 0.9886   | 0.68      | 1.000              |
| 3VPD    | 48              | 3-B                                   | 1     | 0.9872   | 0.73      | 1.000              |
| 3VPD    | 48              | 4-B                                   | 2     | 0.9879   | 0.71      | 1.000              |
| 3VPD    | 48              | 5-B                                   | 3     | 0.9861   | 0.75      | 1.000              |
| 5IG8    | 48              | 1-A                                   | 5     | 0.8862   | 3.55      | 1.000              |
| 5IG8    | 48              | 2-A                                   | 2     | 0.8913   | 3.35      | 1.000              |
| 5IG8    | 48              | 3-A                                   | 1     | 0.8829   | 3.99      | 1.000              |
| 5IG8    | 48              | 4-A                                   | 4     | 0.8816   | 3.95      | 1.000              |
| 5IG8    | 48              | 5-A                                   | 3     | 0.8854   | 3.79      | 1.000              |
| 5IG8    | 48              | 1-B                                   | 5     | 0.9811   | 0.82      | 1.000              |
| 5IG8    | 48              | 2-B                                   | 2     | 0.9830   | 0.77      | 1.000              |
| 5IG8    | 48              | 3-B                                   | 1     | 0.9820   | 0.80      | 1.000              |
| 5IG8    | 48              | 4-B                                   | 4     | 0.9787   | 0.87      | 1.000              |
| 5IG8    | 48              | 5-B                                   | 3     | 0.9810   | 0.82      | 1.000              |
| 5IG9    | 48              | 1-A                                   | 5     | 0.9381   | 4.01      | 0.981              |
| 5IG9    | 48              | 2-A                                   | 4     | 0.9471   | 3.93      | 0.981              |
| 5IG9    | 48              | 3-A                                   | 1     | 0.9459   | 3.93      | 0.981              |
| 5IG9    | 48              | 4-A                                   | 3     | 0.9383   | 4.02      | 0.981              |
| 5IG9    | 48              | 5-A                                   | 2     | 0.9472   | 3.96      | 0.981              |
| 5IG9    | 48              | 1-B                                   | 5     | 0.9642   | 1.38      | 0.980              |
| 5IG9    | 48              | 2-B                                   | 4     | 0.9727   | 1.21      | 0.980              |
| 5IG9    | 48              | 3-B                                   | 1     | 0.9742   | 1.19      | 0.980              |
| 5IG9    | 48              | 4-B                                   | 3     | 0.9645   | 1.39      | 0.980              |
| 5IG9    | 48              | 5-B                                   | 2     | 0.9753   | 1.15      | 0.980              |
| 5IG9    | 48              | 1-C                                   | 5     | 0.9481   | 3.33      | 0.984              |
| 5IG9    | 48              | 2-C                                   | 4     | 0.9565   | 3.24      | 0.984              |
| 5IG9    | 48              | 3-C                                   | 1     | 0.9563   | 3.24      | 0.984              |
| 5IG9    | 48              | 4-C                                   | 3     | 0.9510   | 3.31      | 0.984              |
| 5IG9    | 48              | 5-C                                   | 2     | 0.9573   | 3.28      | 0.984              |
| 5IG9    | 48              | 1-D                                   | 5     | 0.9688   | 1.32      | 0.984              |
| 5IG9    | 48              | 2-D                                   | 4     | 0.9773   | 1.15      | 0.984              |
| 5IG9    | 48              | 3-D                                   | 1     | 0.9782   | 1.13      | 0.984              |
| 5IG9    | 48              | 4-D                                   | 3     | 0.9697   | 1.30      | 0.984              |
| 5IG9    | 48              | 5-D                                   | 2     | 0.9797   | 1.08      | 0.984              |
| 5IG9    | 48              | 1-E                                   | 5     | 0.9437   | 3.75      | 0.984              |
| 5IG9    | 48              | 2-E                                   | 4     | 0.9524   | 3.67      | 0.984              |
| 5IG9    | 48              | 3-E                                   | 1     | 0.9520   | 3.66      | 0.984              |
| 5IG9    | 48              | 4-E                                   | 3     | 0.9471   | 3.73      | 0.984              |
| 5IG9    | 48              | 5-E                                   | 2     | 0.9532   | 3.70      | 0.984              |
| 5IG9    | 48              | 1-F                                   | 5     | 0.9712   | 1.31      | 0.983              |
| 5IG9    | 48              | 2-F                                   | 4     | 0.9794   | 1.14      | 0.983              |
| 5IG9    | 48              | 3-F                                   | 1     | 0.9804   | 1.13      | 0.983              |
| 5IG9    | 48              | 4-F                                   | 3     | 0.9734   | 1.27      | 0.983              |
| 5IG9    | 48              | 5-F                                   | 2     | 0.9817   | 1.09      | 0.983              |
| 5IG9    | 48              | 1-G                                   | 5     | 0.9461   | 3.74      | 0.984              |
| 5IG9    | 48              | 2-G                                   | 4     | 0.9538   | 3.67      | 0.984              |
| 5IG9    | 48              | 3-G                                   | 1     | 0.9543   | 3.66      | 0.984              |
| 5IG9    | 48              | 4-G                                   | 3     | 0.9488   | 3.73      | 0.984              |
| 5IG9    | 48              | 5-G                                   | 2     | 0.9553   | 3.70      | 0.984              |
| 5IG9    | 48              | 1-H                                   | 5     | 0.9626   | 1.31      | 0.981              |
| 5IG9    | 48              | 2-H                                   | 4     | 0.9703   | 1.13      | 0.981              |
| 5IG9    | 48              | 3-H                                   | 1     | 0.9723   | 1.09      | 0.981              |
| 5IG9    | 48              | 4-H                                   | 3     | 0.9631   | 1.32      | 0.981              |
| 5IG9    | 48              | 5-H                                   | 2     | 0.9743   | 1.03      | 0.981              |
| 7DRM    | 48              | 1-A                                   | 5     | 0.9309   | 2.67      | 1.000              |
| 7DRM    | 48              | 2-A                                   | 4     | 0.9377   | 2.56      | 1.000              |
| 7DRM    | 48              | 3-A                                   | 1     | 0.9447   | 2.51      | 1.000              |
| 7DRM    | 48              | 4-A                                   | 2     | 0.9288   | 2.63      | 1.000              |
| 7DRM    | 48              | 5-A                                   | 3     | 0.9357   | 2.51      | 1.000              |
| 7DRM    | 48              | 1-B                                   | 5     | 0.9458   | 1.70      | 1.000              |
| 7DRM    | 48              | 2-B                                   | 4     | 0.9478   | 1.64      | 1.000              |
| 7DRM    | 48              | 3-B                                   | 1     | 0.9549   | 1.57      | 1.000              |
| 7DRM    | 48              | 4-B                                   | 2     | 0.9469   | 1.61      | 1.000              |

| PDB ID: | Recycle Number: | Model Number and PDB Reference Chain: | Rank: | TMscore: | RMSD (Å): | Sequence Identity: |
|---------|-----------------|---------------------------------------|-------|----------|-----------|--------------------|
| 7DRM    | 48              | 5-B                                   | 3     | 0.9559   | 1.46      | 1.000              |
| 7DRM    | 48              | 1-C                                   | 5     | 0.9288   | 2.67      | 1.000              |
| 7DRM    | 48              | 2-C                                   | 4     | 0.9359   | 2.55      | 1.000              |
| 7DRM    | 48              | 3-C                                   | 1     | 0.9432   | 2.49      | 1.000              |
| 7DRM    | 48              | 4-C                                   | 2     | 0.9263   | 2.64      | 1.000              |
| 7DRM    | 48              | 5-C                                   | 3     | 0.9326   | 2.53      | 1.000              |
| 7DRM    | 48              | 1-D                                   | 5     | 0.9147   | 3.06      | 0.994              |
| 7DRM    | 48              | 2-D                                   | 4     | 0.9153   | 3.16      | 0.994              |
| 7DRM    | 48              | 3-D                                   | 1     | 0.9236   | 2.98      | 0.994              |
| 7DRM    | 48              | 4-D                                   | 2     | 0.9141   | 3.02      | 0.994              |
| 7DRM    | 48              | 5-D                                   | 3     | 0.9256   | 2.85      | 0.994              |
| 7M4S    | 48              | 1-A                                   | 5     | 0.9186   | 2.85      | 1.000              |
| 7M4S    | 48              | 2-A                                   | 2     | 0.9149   | 2.91      | 1.000              |
| 7M4S    | 48              | 3-A                                   | 1     | 0.9214   | 2.82      | 1.000              |
| 7M4S    | 48              | 4-A                                   | 3     | 0.9206   | 2.85      | 1.000              |
| 7M4S    | 48              | 5-A                                   | 4     | 0.9200   | 2.70      | 1.000              |
| 7M4S    | 48              | 1-B                                   | 5     | 0.9202   | 2.60      | 1.000              |
| 7M4S    | 48              | 2-B                                   | 2     | 0.9172   | 2.66      | 1.000              |
| 7M4S    | 48              | 3-B                                   | 1     | 0.9225   | 2.56      | 1.000              |
| 7M4S    | 48              | 4-B                                   | 3     | 0.9200   | 2.64      | 1.000              |
| 7M4S    | 48              | 5-B                                   | 4     | 0.9215   | 2.50      | 1.000              |
| 7M4S    | 48              | 1-C                                   | 5     | 0.9234   | 3.50      | 1.000              |
| 7M4S    | 48              | 2-C                                   | 2     | 0.9217   | 3.52      | 1.000              |
| 7M4S    | 48              | 3-C                                   | 1     | 0.9244   | 3.46      | 1.000              |
| 7M4S    | 48              | 4-C                                   | 3     | 0.9221   | 3.56      | 1.000              |
| 7M4S    | 48              | 5-C                                   | 4     | 0.9188   | 3.58      | 1.000              |
| 7M4S    | 48              | 1-D                                   | 5     | 0.9335   | 3.99      | 1.000              |
| 7M4S    | 48              | 2-D                                   | 2     | 0.9310   | 4.01      | 1.000              |
| 7M4S    | 48              | 3-D                                   | 1     | 0.9356   | 3.94      | 1.000              |
| 7M4S    | 48              | 4-D                                   | 3     | 0.9341   | 4.02      | 1.000              |
| 7M4S    | 48              | 5-D                                   | 4     | 0.9326   | 4.02      | 1.000              |
| 7MGV    | 48              | 1-A                                   | 2     | 0.9226   | 4.13      | 1.000              |
| 7MGV    | 48              | 2-A                                   | 5     | 0.9198   | 4.19      | 1.000              |
| 7MGV    | 48              | 3-A                                   | 1     | 0.9256   | 4.06      | 1.000              |
| 7MGV    | 48              | 4-A                                   | 4     | 0.9241   | 4.28      | 1.000              |
| 7MGV    | 48              | 5-A                                   | 3     | 0.9290   | 3.98      | 1.000              |
| 7MGV    | 48              | 1-B                                   | 2     | 0.9772   | 1.05      | 1.000              |
| 7MGV    | 48              | 2-B                                   | 5     | 0.9755   | 1.09      | 1.000              |
| 7MGV    | 48              | 3-B                                   | 1     | 0.9818   | 0.93      | 1.000              |
| 7MGV    | 48              | 4-B                                   | 4     | 0.9610   | 1.63      | 1.000              |
| 7MGV    | 48              | 5-B                                   | 3     | 0.9828   | 0.90      | 1.000              |

**Table S2.** Monomer ATP Grasp Ligase RiPP biosynthetic enzyme US-align results with template. Enzymes with multiple available reference subunits are denoted with their corresponding chain letters.

| PDB ID: | Recycle Number: | Model Number and PDB Reference Chain: | Rank: | TMscore: | RMSD (Å): | Sequence Identity: |
|---------|-----------------|---------------------------------------|-------|----------|-----------|--------------------|
| 3VPB    | 3               | 1-A                                   | 3     | 0.9906   | 0.61      | 1.000              |
| 3VPB    | 3               | 2-A                                   | 4     | 0.9912   | 0.59      | 1.000              |
| 3VPB    | 3               | 3-A                                   | 1     | 0.9918   | 0.57      | 1.000              |
| 3VPB    | 3               | 4-A                                   | 5     | 0.9885   | 0.67      | 1.000              |
| 3VPB    | 3               | 5-A                                   | 2     | 0.9896   | 0.64      | 1.000              |
| 3VPB    | 3               | 1-B                                   | 3     | 0.9900   | 0.64      | 1.000              |
| 3VPB    | 3               | 2-B                                   | 4     | 0.9906   | 0.61      | 1.000              |
| 3VPB    | 3               | 3-B                                   | 1     | 0.9911   | 0.59      | 1.000              |
| 3VPB    | 3               | 4-B                                   | 5     | 0.9879   | 0.70      | 1.000              |
| 3VPB    | 3               | 5-B                                   | 2     | 0.9889   | 0.67      | 1.000              |
| 3VPB    | 3               | 1-C                                   | 3     | 0.9925   | 0.54      | 1.000              |
| 3VPB    | 3               | 2-C                                   | 4     | 0.9935   | 0.50      | 1.000              |
| 3VPB    | 3               | 3-C                                   | 1     | 0.9939   | 0.49      | 1.000              |
| 3VPB    | 3               | 4-C                                   | 5     | 0.9939   | 0.49      | 1.000              |

| PDB ID: | Recycle Number: | Model Number and PDB Reference Chain: | Rank: | TMscore: | RMSD (Å): | Sequence Identity: |
|---------|-----------------|---------------------------------------|-------|----------|-----------|--------------------|
| 3VPB    | 3               | 5-C                                   | 2     | 0.9917   | 0.57      | 1.000              |
| 3VPB    | 3               | 1-D                                   | 3     | 0.9928   | 0.53      | 1.000              |
| 3VPB    | 3               | 2-D                                   | 4     | 0.9938   | 0.49      | 1.000              |
| 3VPB    | 3               | 3-D                                   | 1     | 0.9942   | 0.48      | 1.000              |
| 3VPB    | 3               | 4-D                                   | 5     | 0.9940   | 0.48      | 1.000              |
| 3VPB    | 3               | 5-D                                   | 2     | 0.9922   | 0.56      | 1.000              |
| 3VPD    | 3               | 1-A                                   | 3     | 0.9939   | 0.53      | 1.000              |
| 3VPD    | 3               | 2-A                                   | 1     | 0.9931   | 0.57      | 1.000              |
| 3VPD    | 3               | 3-A                                   | 2     | 0.9882   | 0.88      | 1.000              |
| 3VPD    | 3               | 4-A                                   | 4     | 0.9833   | 0.85      | 1.000              |
| 3VPD    | 3               | 5-A                                   | 5     | 0.9814   | 0.90      | 1.000              |
| 3VPD    | 3               | 1-B                                   | 3     | 0.9895   | 0.65      | 1.000              |
| 3VPD    | 3               | 2-B                                   | 1     | 0.9890   | 0.67      | 1.000              |
| 3VPD    | 3               | 3-B                                   | 2     | 0.9882   | 0.71      | 1.000              |
| 3VPD    | 3               | 4-B                                   | 4     | 0.9876   | 0.72      | 1.000              |
| 3VPD    | 3               | 5-B                                   | 5     | 0.9857   | 0.75      | 1.000              |
| 5IG8    | 3               | 1-A                                   | 5     | 0.9197   | 3.04      | 1.000              |
| 5IG8    | 3               | 2-A                                   | 3     | 0.9222   | 2.87      | 1.000              |
| 5IG8    | 3               | 3-A                                   | 1     | 0.8869   | 3.55      | 1.000              |
| 5IG8    | 3               | 4-A                                   | 4     | 0.8808   | 3.97      | 1.000              |
| 5IG8    | 3               | 5-A                                   | 1     | 0.9197   | 3.04      | 1.000              |
| 5IG8    | 3               | 1-B                                   | 5     | 0.9919   | 0.54      | 1.000              |
| 5IG8    | 3               | 2-B                                   | 3     | 0.9913   | 0.56      | 1.000              |
| 5IG8    | 3               | 3-B                                   | 1     | 0.9818   | 0.80      | 1.000              |
| 5IG8    | 3               | 4-B                                   | 4     | 0.9813   | 0.81      | 1.000              |
| 5IG8    | 3               | 5-B                                   | 2     | 0.9801   | 0.84      | 1.000              |
| 5IG9    | 3               | 1-A                                   | 2     | 0.9583   | 3.89      | 0.981              |
| 5IG9    | 3               | 2-A                                   | 1     | 0.9583   | 3.89      | 0.981              |
| 5IG9    | 3               | 3-A                                   | 3     | 0.9450   | 3.94      | 0.981              |
| 5IG9    | 3               | 4-A                                   | 5     | 0.9411   | 3.96      | 0.981              |
| 5IG9    | 3               | 5-A                                   | 4     | 0.9465   | 3.94      | 0.981              |
| 5IG9    | 3               | 1-B                                   | 2     | 0.9885   | 0.89      | 0.981              |
| 5IG9    | 3               | 2-B                                   | 1     | 0.9888   | 0.88      | 0.981              |
| 5IG9    | 3               | 3-B                                   | 3     | 0.9726   | 1.22      | 0.981              |
| 5IG9    | 3               | 4-B                                   | 5     | 0.9678   | 1.32      | 0.981              |
| 5IG9    | 3               | 5-B                                   | 4     | 0.9749   | 1.17      | 0.981              |
| 5IG9    | 3               | 1-C                                   | 2     | 0.9674   | 3.17      | 0.984              |
| 5IG9    | 3               | 2-C                                   | 1     | 0.9669   | 3.19      | 0.984              |
| 5IG9    | 3               | 3-C                                   | 3     | 0.9552   | 3.25      | 0.984              |
| 5IG9    | 3               | 4-C                                   | 5     | 0.9528   | 3.25      | 0.984              |
| 5IG9    | 3               | 5-C                                   | 4     | 0.9563   | 3.25      | 0.984              |
| 5IG9    | 3               | 1-D                                   | 2     | 0.9901   | 0.87      | 0.984              |
| 5IG9    | 3               | 2-D                                   | 1     | 0.9899   | 0.88      | 0.984              |
| 5IG9    | 3               | 3-D                                   | 3     | 0.9771   | 1.15      | 0.984              |
| 5IG9    | 3               | 4-D                                   | 5     | 0.9728   | 1.23      | 0.984              |
| 5IG9    | 3               | 5-D                                   | 4     | 0.9780   | 1.14      | 0.984              |
| 5IG9    | 3               | 1-E                                   | 2     | 0.9634   | 3.63      | 0.984              |
| 5IG9    | 3               | 2-E                                   | 1     | 0.9627   | 3.64      | 0.984              |
| 5IG9    | 3               | 3-E                                   | 3     | 0.9511   | 3.68      | 0.984              |
| 5IG9    | 3               | 4-E                                   | 5     | 0.9487   | 3.69      | 0.984              |
| 5IG9    | 3               | 5-E                                   | 4     | 0.9521   | 3.68      | 0.984              |
| 5IG9    | 3               | 1-F                                   | 2     | 0.9923   | 0.88      | 0.983              |
| 5IG9    | 3               | 2-F                                   | 1     | 0.9921   | 0.88      | 0.983              |
| 5IG9    | 3               | 3-F                                   | 3     | 0.9791   | 1.16      | 0.983              |
| 5IG9    | 3               | 4-F                                   | 5     | 0.9760   | 1.21      | 0.983              |
| 5IG9    | 3               | 5-F                                   | 4     | 0.9800   | 1.14      | 0.983              |
| 5IG9    | 3               | 1-G                                   | 2     | 0.9648   | 3.63      | 0.984              |
| 5IG9    | 3               | 2-G                                   | 1     | 0.9642   | 3.64      | 0.984              |
| 5IG9    | 3               | 3-G                                   | 3     | 0.9530   | 3.67      | 0.984              |
| 5IG9    | 3               | 4-G                                   | 5     | 0.9507   | 3.68      | 0.984              |
| 5IG9    | 3               | 5-G                                   | 4     | 0.9543   | 3.67      | 0.984              |
| 5IG9    | 3               | 1-H                                   | 2     | 0.9868   | 0.73      | 0.981              |
| 5IG9    | 3               | 2-H                                   | 1     | 0.9874   | 0.69      | 0.981              |
| 5IG9    | 3               | 3-H                                   | 3     | 0.9710   | 1.12      | 0.981              |

| PDB ID: | Recycle Number: | Model Number and PDB Reference Chain: | Rank: | TMscore: | RMSD (Å): | Sequence Identity: |
|---------|-----------------|---------------------------------------|-------|----------|-----------|--------------------|
| 5IG9    | 3               | 4-H                                   | 5     | 0.9654   | 1.27      | 0.981              |
| 5IG9    | 3               | 5-H                                   | 4     | 0.9729   | 1.07      | 0.981              |
| 7DRM    | 3               | 1-A                                   | 5     | 0.9451   | 2.68      | 1.000              |
| 7DRM    | 3               | 2-A                                   | 2     | 0.9494   | 2.45      | 1.000              |
| 7DRM    | 3               | 3-A                                   | 1     | 0.9474   | 2.44      | 1.000              |
| 7DRM    | 3               | 4-A                                   | 3     | 0.9311   | 2.68      | 1.000              |
| 7DRM    | 3               | 5-A                                   | 4     | 0.9242   | 2.68      | 1.000              |
| 7DRM    | 3               | 1-B                                   | 5     | 0.9557   | 1.52      | 1.000              |
| 7DRM    | 3               | 2-B                                   | 2     | 0.9516   | 1.59      | 1.000              |
| 7DRM    | 3               | 3-B                                   | 1     | 0.9559   | 1.51      | 1.000              |
| 7DRM    | 3               | 4-B                                   | 3     | 0.9464   | 1.75      | 1.000              |
| 7DRM    | 3               | 5-B                                   | 4     | 0.9501   | 1.65      | 1.000              |
| 7DRM    | 3               | 1-C                                   | 5     | 0.9436   | 2.51      | 1.000              |
| 7DRM    | 3               | 2-C                                   | 2     | 0.9480   | 2.45      | 1.000              |
| 7DRM    | 3               | 3-C                                   | 1     | 0.9461   | 2.43      | 1.000              |
| 7DRM    | 3               | 4-C                                   | 3     | 0.9296   | 2.66      | 1.000              |
| 7DRM    | 3               | 5-C                                   | 4     | 0.9220   | 2.68      | 1.000              |
| 7DRM    | 3               | 1-D                                   | 5     | 0.9263   | 2.91      | 0.994              |
| 7DRM    | 3               | 2-D                                   | 2     | 0.9233   | 2.93      | 0.994              |
| 7DRM    | 3               | 3-D                                   | 1     | 0.9261   | 2.90      | 0.994              |
| 7DRM    | 3               | 4-D                                   | 3     | 0.9150   | 3.07      | 0.994              |
| 7DRM    | 3               | 5-D                                   | 4     | 0.9173   | 2.99      | 0.994              |
| 7M4S    | 3               | 1-A                                   | 5     | 0.9177   | 2.87      | 1.000              |
| 7M4S    | 3               | 2-A                                   | 2     | 0.9216   | 2.80      | 1.000              |
| 7M4S    | 3               | 3-A                                   | 1     | 0.9177   | 2.83      | 1.000              |
| 7M4S    | 3               | 4-A                                   | 3     | 0.9115   | 2.94      | 1.000              |
| 7M4S    | 3               | 5-A                                   | 4     | 0.9116   | 2.98      | 1.000              |
| 7M4S    | 3               | 1-B                                   | 5     | 0.9221   | 2.63      | 1.000              |
| 7M4S    | 3               | 2-B                                   | 2     | 0.9256   | 2.56      | 1.000              |
| 7M4S    | 3               | 3-B                                   | 1     | 0.9166   | 2.64      | 1.000              |
| 7M4S    | 3               | 4-B                                   | 3     | 0.9113   | 2.75      | 1.000              |
| 7M4S    | 3               | 5-B                                   | 4     | 0.9108   | 2.75      | 1.000              |
| 7M4S    | 3               | 1-C                                   | 5     | 0.9194   | 3.57      | 1.000              |
| 7M4S    | 3               | 2-C                                   | 2     | 0.9234   | 3.53      | 1.000              |
| 7M4S    | 3               | 3-C                                   | 1     | 0.9220   | 3.44      | 1.000              |
| 7M4S    | 3               | 4-C                                   | 3     | 0.9173   | 3.54      | 1.000              |
| 7M4S    | 3               | 5-C                                   | 4     | 0.9154   | 3.58      | 1.000              |
| 7M4S    | 3               | 1-D                                   | 5     | 0.9311   | 4.02      | 1.000              |
| 7M4S    | 3               | 2-D                                   | 2     | 0.9368   | 3.98      | 1.000              |
| 7M4S    | 3               | 3-D                                   | 1     | 0.9335   | 3.91      | 1.000              |
| 7M4S    | 3               | 4-D                                   | 3     | 0.9274   | 4.00      | 1.000              |
| 7M4S    | 3               | 5-D                                   | 4     | 0.9272   | 4.03      | 1.000              |
| 7MGV    | 3               | 1-A                                   | 5     | 0.9265   | 4.11      | 1.000              |
| 7MGV    | 3               | 2-A                                   | 3     | 0.9195   | 4.21      | 1.000              |
| 7MGV    | 3               | 3-A                                   | 1     | 0.9247   | 4.08      | 1.000              |
| 7MGV    | 3               | 4-A                                   | 4     | 0.9229   | 4.31      | 1.000              |
| 7MGV    | 3               | 5-A                                   | 2     | 0.9245   | 4.13      | 1.000              |
| 7MGV    | 3               | 1-B                                   | 5     | 0.9827   | 0.91      | 1.000              |
| 7MGV    | 3               | 2-B                                   | 3     | 0.9755   | 1.09      | 1.000              |
| 7MGV    | 3               | 3-B                                   | 1     | 0.9813   | 0.94      | 1.000              |
| 7MGV    | 3               | 4-B                                   | 4     | 0.9619   | 1.58      | 1.000              |
| 7MGV    | 3               | 5-B                                   | 2     | 0.9818   | 0.93      | 1.000              |
| 3VPB    | 12              | 1-A                                   | 3     | 0.9907   | 0.61      | 1.000              |
| 3VPB    | 12              | 2-A                                   | 5     | 0.9911   | 0.59      | 1.000              |
| 3VPB    | 12              | 3-A                                   | 1     | 0.9907   | 0.61      | 1.000              |
| 3VPB    | 12              | 4-A                                   | 4     | 0.9901   | 0.63      | 1.000              |
| 3VPB    | 12              | 5-A                                   | 2     | 0.9886   | 0.68      | 1.000              |
| 3VPB    | 12              | 1-B                                   | 3     | 0.9900   | 0.63      | 1.000              |
| 3VPB    | 12              | 2-B                                   | 5     | 0.9905   | 0.62      | 1.000              |
| 3VPB    | 12              | 3-B                                   | 1     | 0.9900   | 0.63      | 1.000              |
| 3VPB    | 12              | 4-B                                   | 4     | 0.9895   | 0.65      | 1.000              |
| 3VPB    | 12              | 5-B                                   | 2     | 0.9880   | 0.70      | 1.000              |
| 3VPB    | 12              | 1-C                                   | 3     | 0.9929   | 0.53      | 1.000              |
| 3VPB    | 12              | 2-C                                   | 5     | 0.9939   | 0.49      | 1.000              |

| PDB ID: | Recycle Number: | Model Number and PDB Reference Chain: | Rank: | TMscore: | RMSD (Å): | Sequence Identity: |
|---------|-----------------|---------------------------------------|-------|----------|-----------|--------------------|
| 3VPB    | 12              | 3-C                                   | 1     | 0.9935   | 0.50      | 1.000              |
| 3VPB    | 12              | 4-C                                   | 4     | 0.9944   | 0.47      | 1.000              |
| 3VPB    | 12              | 5-C                                   | 2     | 0.9916   | 0.58      | 1.000              |
| 3VPB    | 12              | 1-D                                   | 3     | 0.9932   | 0.52      | 1.000              |
| 3VPB    | 12              | 2-D                                   | 5     | 0.9918   | 0.57      | 1.000              |
| 3VPB    | 12              | 3-D                                   | 1     | 0.9939   | 0.49      | 1.000              |
| 3VPB    | 12              | 4-D                                   | 4     | 0.9946   | 0.46      | 1.000              |
| 3VPB    | 12              | 5-D                                   | 2     | 0.9918   | 0.57      | 1.000              |
| 3VPD    | 12              | 1-A                                   | 3     | 0.9940   | 0.53      | 1.000              |
| 3VPD    | 12              | 2-A                                   | 1     | 0.9930   | 0.58      | 1.000              |
| 3VPD    | 12              | 3-A                                   | 2     | 0.9802   | 0.93      | 1.000              |
| 3VPD    | 12              | 4-A                                   | 4     | 0.9829   | 0.86      | 1.000              |
| 3VPD    | 12              | 5-A                                   | 5     | 0.9806   | 0.92      | 1.000              |
| 3VPD    | 12              | 1-B                                   | 3     | 0.9898   | 0.65      | 1.000              |
| 3VPD    | 12              | 2-B                                   | 1     | 0.9893   | 0.67      | 1.000              |
| 3VPD    | 12              | 3-B                                   | 2     | 0.9878   | 0.72      | 1.000              |
| 3VPD    | 12              | 4-B                                   | 4     | 0.9881   | 0.71      | 1.000              |
| 3VPD    | 12              | 5-B                                   | 5     | 0.9864   | 0.74      | 1.000              |
| 5IG8    | 12              | 1-A                                   | 5     | 0.9197   | 3.04      | 1.000              |
| 5IG8    | 12              | 2-A                                   | 4     | 0.9231   | 2.81      | 1.000              |
| 5IG8    | 12              | 3-A                                   | 1     | 0.8831   | 3.91      | 1.000              |
| 5IG8    | 12              | 4-A                                   | 3     | 0.8816   | 3.94      | 1.000              |
| 5IG8    | 12              | 5-A                                   | 2     | 0.8868   | 3.72      | 1.000              |
| 5IG8    | 12              | 1-B                                   | 5     | 0.9921   | 0.54      | 1.000              |
| 5IG8    | 12              | 2-B                                   | 4     | 0.9916   | 0.55      | 1.000              |
| 5IG8    | 12              | 3-B                                   | 1     | 0.9813   | 0.81      | 1.000              |
| 5IG8    | 12              | 4-B                                   | 3     | 0.9798   | 0.84      | 1.000              |
| 5IG8    | 12              | 5-B                                   | 2     | 0.9921   | 0.54      | 1.000              |
| 5IG9    | 12              | 1-A                                   | 2     | 0.9601   | 3.87      | 0.981              |
| 5IG9    | 12              | 2-A                                   | 1     | 0.9601   | 3.87      | 0.981              |
| 5IG9    | 12              | 3-A                                   | 3     | 0.9431   | 3.96      | 0.981              |
| 5IG9    | 12              | 4-A                                   | 5     | 0.9369   | 4.03      | 0.981              |
| 5IG9    | 12              | 5-A                                   | 4     | 0.9481   | 3.94      | 0.981              |
| 5IG9    | 12              | 1-B                                   | 2     | 0.9904   | 0.82      | 0.980              |
| 5IG9    | 12              | 2-B                                   | 1     | 0.9910   | 0.81      | 0.980              |
| 5IG9    | 12              | 3-B                                   | 3     | 0.9709   | 1.26      | 0.980              |
| 5IG9    | 12              | 4-B                                   | 5     | 0.9639   | 1.41      | 0.980              |
| 5IG9    | 12              | 5-B                                   | 4     | 0.9764   | 1.13      | 0.980              |
| 5IG9    | 12              | 1-C                                   | 2     | 0.9692   | 3.17      | 0.984              |
| 5IG9    | 12              | 2-C                                   | 1     | 0.9693   | 3.16      | 0.984              |
| 5IG9    | 12              | 3-C                                   | 3     | 0.9540   | 3.26      | 0.984              |
| 5IG9    | 12              | 4-C                                   | 5     | 0.9501   | 3.31      | 0.984              |
| 5IG9    | 12              | 5-C                                   | 4     | 0.9577   | 3.25      | 0.984              |
| 5IG9    | 12              | 1-D                                   | 2     | 0.9921   | 0.80      | 0.984              |
| 5IG9    | 12              | 2-D                                   | 1     | 0.9920   | 0.81      | 0.984              |
| 5IG9    | 12              | 3-D                                   | 3     | 0.9756   | 1.19      | 0.984              |
| 5IG9    | 12              | 4-D                                   | 5     | 0.9691   | 1.31      | 0.984              |
| 5IG9    | 12              | 5-D                                   | 4     | 0.9801   | 1.08      | 0.984              |
| 5IG9    | 12              | 1-E                                   | 2     | 0.9651   | 3.62      | 0.984              |
| 5IG9    | 12              | 2-E                                   | 1     | 0.9651   | 3.61      | 0.984              |
| 5IG9    | 12              | 3-E                                   | 3     | 0.9499   | 3.69      | 0.984              |
| 5IG9    | 12              | 4-E                                   | 5     | 0.9463   | 3.74      | 0.984              |
| 5IG9    | 12              | 5-E                                   | 4     | 0.9537   | 3.68      | 0.984              |
| 5IG9    | 12              | 1-F                                   | 2     | 0.9943   | 0.81      | 0.983              |
| 5IG9    | 12              | 2-F                                   | 1     | 0.9943   | 0.81      | 0.983              |
| 5IG9    | 12              | 3-F                                   | 3     | 0.9780   | 1.18      | 0.983              |
| 5IG9    | 12              | 4-F                                   | 5     | 0.9731   | 1.27      | 0.983              |
| 5IG9    | 12              | 5-F                                   | 4     | 0.9820   | 1.09      | 0.983              |
| 5IG9    | 12              | 1-G                                   | 2     | 0.9665   | 3.61      | 0.984              |
| 5IG9    | 12              | 2-G                                   | 1     | 0.9667   | 3.61      | 0.984              |
| 5IG9    | 12              | 3-G                                   | 3     | 0.9519   | 3.69      | 0.984              |
| 5IG9    | 12              | 4-G                                   | 5     | 0.9481   | 3.73      | 0.984              |
| 5IG9    | 12              | 5-G                                   | 4     | 0.9557   | 3.68      | 0.984              |
| 5IG9    | 12              | 1-H                                   | 2     | 0.9889   | 0.63      | 0.981              |

| PDB ID: | Recycle Number: | Model Number and PDB Reference Chain: | Rank: | TMscore: | RMSD (Å): | Sequence Identity: |
|---------|-----------------|---------------------------------------|-------|----------|-----------|--------------------|
| 5IG9    | 12              | 2-H                                   | 1     | 0.9896   | 0.59      | 0.981              |
| 5IG9    | 12              | 3-H                                   | 3     | 0.9693   | 1.16      | 0.981              |
| 5IG9    | 12              | 4-H                                   | 5     | 0.9625   | 1.34      | 0.981              |
| 5IG9    | 12              | 5-H                                   | 4     | 0.9748   | 1.02      | 0.981              |
| 7DRM    | 12              | 1-A                                   | 5     | 0.9432   | 2.56      | 1.000              |
| 7DRM    | 12              | 2-A                                   | 3     | 0.9476   | 2.48      | 1.000              |
| 7DRM    | 12              | 3-A                                   | 1     | 0.9445   | 2.49      | 1.000              |
| 7DRM    | 12              | 4-A                                   | 2     | 0.9264   | 2.77      | 1.000              |
| 7DRM    | 12              | 5-A                                   | 4     | 0.9166   | 2.77      | 1.000              |
| 7DRM    | 12              | 1-B                                   | 5     | 0.9536   | 1.56      | 1.000              |
| 7DRM    | 12              | 2-B                                   | 3     | 0.9492   | 1.62      | 1.000              |
| 7DRM    | 12              | 3-B                                   | 1     | 0.9567   | 1.51      | 1.000              |
| 7DRM    | 12              | 4-B                                   | 2     | 0.9422   | 1.86      | 1.000              |
| 7DRM    | 12              | 5-B                                   | 4     | 0.9454   | 1.73      | 1.000              |
| 7DRM    | 12              | 1-C                                   | 5     | 0.9416   | 2.55      | 1.000              |
| 7DRM    | 12              | 2-C                                   | 3     | 0.9464   | 2.47      | 1.000              |
| 7DRM    | 12              | 3-C                                   | 1     | 0.9464   | 2.47      | 1.000              |
| 7DRM    | 12              | 4-C                                   | 2     | 0.9431   | 2.48      | 1.000              |
| 7DRM    | 12              | 5-C                                   | 4     | 0.9249   | 2.73      | 1.000              |
| 7DRM    | 12              | 1-D                                   | 5     | 0.9239   | 2.96      | 0.994              |
| 7DRM    | 12              | 2-D                                   | 3     | 0.9210   | 2.96      | 0.994              |
| 7DRM    | 12              | 3-D                                   | 1     | 0.9260   | 2.92      | 0.994              |
| 7DRM    | 12              | 4-D                                   | 2     | 0.9104   | 3.15      | 0.994              |
| 7DRM    | 12              | 5-D                                   | 4     | 0.9122   | 3.06      | 0.994              |
| 7M4S    | 12              | 1-A                                   | 4     | 0.9164   | 2.92      | 1.000              |
| 7M4S    | 12              | 2-A                                   | 1     | 0.9209   | 2.82      | 1.000              |
| 7M4S    | 12              | 3-A                                   | 2     | 0.9187   | 2.84      | 1.000              |
| 7M4S    | 12              | 4-A                                   | 3     | 0.9169   | 2.83      | 1.000              |
| 7M4S    | 12              | 5-A                                   | 5     | 0.9189   | 2.78      | 1.000              |
| 7M4S    | 12              | 1-B                                   | 4     | 0.9208   | 2.65      | 1.000              |
| 7M4S    | 12              | 2-B                                   | 1     | 0.9239   | 2.59      | 1.000              |
| 7M4S    | 12              | 3-B                                   | 2     | 0.9196   | 2.59      | 1.000              |
| 7M4S    | 12              | 4-B                                   | 3     | 0.9162   | 2.65      | 1.000              |
| 7M4S    | 12              | 5-B                                   | 5     | 0.9198   | 2.55      | 1.000              |
| 7M4S    | 12              | 1-C                                   | 4     | 0.9192   | 3.56      | 1.000              |
| 7M4S    | 12              | 2-C                                   | 1     | 0.9228   | 3.52      | 1.000              |
| 7M4S    | 12              | 3-C                                   | 2     | 0.9227   | 3.46      | 1.000              |
| 7M4S    | 12              | 4-C                                   | 3     | 0.9205   | 3.53      | 1.000              |
| 7M4S    | 12              | 5-C                                   | 5     | 0.9198   | 3.56      | 1.000              |
| 7M4S    | 12              | 1-D                                   | 4     | 0.9302   | 4.02      | 1.000              |
| 7M4S    | 12              | 2-D                                   | 1     | 0.9354   | 3.97      | 1.000              |
| 7M4S    | 12              | 3-D                                   | 2     | 0.9333   | 3.94      | 1.000              |
| 7M4S    | 12              | 4-D                                   | 3     | 0.9304   | 4.01      | 1.000              |
| 7M4S    | 12              | 5-D                                   | 5     | 0.9331   | 4.01      | 1.000              |
| 7MGV    | 12              | 1-A                                   | 4     | 0.9250   | 4.13      | 1.000              |
| 7MGV    | 12              | 2-A                                   | 5     | 0.9191   | 4.23      | 1.000              |
| 7MGV    | 12              | 3-A                                   | 1     | 0.9247   | 4.09      | 1.000              |
| 7MGV    | 12              | 4-A                                   | 3     | 0.9245   | 4.28      | 1.000              |
| 7MGV    | 12              | 5-A                                   | 2     | 0.9264   | 4.12      | 1.000              |
| 7MGV    | 12              | 1-B                                   | 4     | 0.9806   | 0.96      | 1.000              |
| 7MGV    | 12              | 2-B                                   | 5     | 0.9747   | 1.11      | 1.000              |
| 7MGV    | 12              | 3-B                                   | 1     | 0.9814   | 0.94      | 1.000              |
| 7MGV    | 12              | 4-B                                   | 3     | 0.9618   | 1.63      | 1.000              |
| 7MGV    | 12              | 5-B                                   | 2     | 0.9838   | 0.87      | 1.000              |
| 3VPB    | 24              | 1-A                                   | 3     | 0.9904   | 0.62      | 1.000              |
| 3VPB    | 24              | 2-A                                   | 5     | 0.9910   | 0.60      | 1.000              |
| 3VPB    | 24              | 3-A                                   | 1     | 0.9914   | 0.58      | 1.000              |
| 3VPB    | 24              | 4-A                                   | 4     | 0.9903   | 0.62      | 1.000              |
| 3VPB    | 24              | 5-A                                   | 2     | 0.9886   | 0.67      | 1.000              |
| 3VPB    | 24              | 1-B                                   | 3     | 0.9898   | 0.64      | 1.000              |
| 3VPB    | 24              | 2-B                                   | 5     | 0.9904   | 0.62      | 1.000              |
| 3VPB    | 24              | 3-B                                   | 1     | 0.9898   | 0.64      | 1.000              |
| 3VPB    | 24              | 4-B                                   | 4     | 0.9898   | 0.64      | 1.000              |
| 3VPB    | 24              | 5-B                                   | 2     | 0.9881   | 0.70      | 1.000              |

| PDB ID: | Recycle Number: | Model Number and PDB Reference Chain: | Rank: | TMscore: | RMSD (Å): | Sequence Identity: |
|---------|-----------------|---------------------------------------|-------|----------|-----------|--------------------|
| 3VPB    | 24              | 1-C                                   | 3     | 0.9928   | 0.53      | 1.000              |
| 3VPB    | 24              | 2-C                                   | 5     | 0.9939   | 0.49      | 1.000              |
| 3VPB    | 24              | 3-C                                   | 1     | 0.9936   | 0.50      | 1.000              |
| 3VPB    | 24              | 4-C                                   | 4     | 0.9944   | 0.47      | 1.000              |
| 3VPB    | 24              | 5-C                                   | 2     | 0.9918   | 0.57      | 1.000              |
| 3VPB    | 24              | 1-D                                   | 3     | 0.9931   | 0.52      | 1.000              |
| 3VPB    | 24              | 2-D                                   | 5     | 0.9942   | 0.48      | 1.000              |
| 3VPB    | 24              | 3-D                                   | 1     | 0.9939   | 0.49      | 1.000              |
| 3VPB    | 24              | 4-D                                   | 4     | 0.9945   | 0.46      | 1.000              |
| 3VPB    | 24              | 5-D                                   | 2     | 0.9920   | 0.56      | 1.000              |
| 3VPD    | 24              | 1-A                                   | 3     | 0.9940   | 0.53      | 1.000              |
| 3VPD    | 24              | 2-A                                   | 1     | 0.9930   | 0.58      | 1.000              |
| 3VPD    | 24              | 3-A                                   | 2     | 0.9807   | 0.91      | 1.000              |
| 3VPD    | 24              | 4-A                                   | 4     | 0.9829   | 0.86      | 1.000              |
| 3VPD    | 24              | 5-A                                   | 5     | 0.9812   | 0.90      | 1.000              |
| 3VPD    | 24              | 1-B                                   | 3     | 0.9896   | 0.65      | 1.000              |
| 3VPD    | 24              | 2-B                                   | 1     | 0.9893   | 0.67      | 1.000              |
| 3VPD    | 24              | 3-B                                   | 2     | 0.9878   | 0.72      | 1.000              |
| 3VPD    | 24              | 4-B                                   | 4     | 0.9883   | 0.70      | 1.000              |
| 3VPD    | 24              | 5-B                                   | 5     | 0.9866   | 0.74      | 1.000              |
| 5IG8    | 24              | 1-A                                   | 5     | 0.9201   | 3.00      | 1.000              |
| 5IG8    | 24              | 2-A                                   | 4     | 0.9234   | 2.81      | 1.000              |
| 5IG8    | 24              | 3-A                                   | 1     | 0.8832   | 3.95      | 1.000              |
| 5IG8    | 24              | 4-A                                   | 3     | 0.8796   | 3.97      | 1.000              |
| 5IG8    | 24              | 5-A                                   | 2     | 0.8876   | 3.65      | 1.000              |
| 5IG8    | 24              | 1-B                                   | 5     | 0.9921   | 0.54      | 1.000              |
| 5IG8    | 24              | 2-B                                   | 4     | 0.9918   | 0.54      | 1.000              |
| 5IG8    | 24              | 3-B                                   | 1     | 0.9814   | 0.81      | 1.000              |
| 5IG8    | 24              | 4-B                                   | 3     | 0.9788   | 0.86      | 1.000              |
| 5IG8    | 24              | 5-B                                   | 2     | 0.9810   | 0.82      | 1.000              |
| 5IG9    | 24              | 1-A                                   | 2     | 0.9602   | 3.87      | 0.981              |
| 5IG9    | 24              | 2-A                                   | 1     | 0.9602   | 3.87      | 0.981              |
| 5IG9    | 24              | 3-A                                   | 4     | 0.9432   | 3.96      | 0.981              |
| 5IG9    | 24              | 4-A                                   | 5     | 0.9365   | 4.04      | 0.981              |
| 5IG9    | 24              | 5-A                                   | 3     | 0.9470   | 3.95      | 0.981              |
| 5IG9    | 24              | 1-B                                   | 2     | 0.9906   | 0.82      | 0.980              |
| 5IG9    | 24              | 2-B                                   | 1     | 0.9912   | 0.80      | 0.980              |
| 5IG9    | 24              | 3-B                                   | 4     | 0.9713   | 1.26      | 0.980              |
| 5IG9    | 24              | 4-B                                   | 5     | 0.9637   | 1.42      | 0.980              |
| 5IG9    | 24              | 5-B                                   | 3     | 0.9756   | 1.15      | 0.980              |
| 5IG9    | 24              | 1-C                                   | 2     | 0.9693   | 3.16      | 0.984              |
| 5IG9    | 24              | 2-C                                   | 1     | 0.9695   | 3.16      | 0.984              |
| 5IG9    | 24              | 3-C                                   | 4     | 0.9545   | 3.26      | 0.984              |
| 5IG9    | 24              | 4-C                                   | 5     | 0.9498   | 3.31      | 0.984              |
| 5IG9    | 24              | 5-C                                   | 3     | 0.9574   | 3.26      | 0.984              |
| 5IG9    | 24              | 1-D                                   | 2     | 0.9922   | 0.80      | 0.984              |
| 5IG9    | 24              | 2-D                                   | 1     | 0.9921   | 0.81      | 0.984              |
| 5IG9    | 24              | 3-D                                   | 4     | 0.9760   | 1.18      | 0.984              |
| 5IG9    | 24              | 4-D                                   | 5     | 0.9688   | 1.32      | 0.984              |
| 5IG9    | 24              | 5-D                                   | 3     | 0.9796   | 1.10      | 0.984              |
| 5IG9    | 24              | 1-E                                   | 2     | 0.9652   | 3.61      | 0.984              |
| 5IG9    | 24              | 2-E                                   | 1     | 0.9652   | 3.61      | 0.984              |
| 5IG9    | 24              | 3-E                                   | 4     | 0.9504   | 3.69      | 0.984              |
| 5IG9    | 24              | 4-E                                   | 5     | 0.9458   | 3.74      | 0.984              |
| 5IG9    | 24              | 5-E                                   | 3     | 0.9533   | 3.69      | 0.984              |
| 5IG9    | 24              | 1-F                                   | 2     | 0.9944   | 0.81      | 0.983              |
| 5IG9    | 24              | 2-F                                   | 1     | 0.9945   | 0.81      | 0.983              |
| 5IG9    | 24              | 3-F                                   | 4     | 0.9786   | 1.17      | 0.983              |
| 5IG9    | 24              | 4-F                                   | 5     | 0.9728   | 1.28      | 0.983              |
| 5IG9    | 24              | 5-F                                   | 3     | 0.9818   | 1.10      | 0.983              |
| 5IG9    | 24              | 1-G                                   | 2     | 0.9666   | 3.60      | 0.984              |
| 5IG9    | 24              | 2-G                                   | 1     | 0.9669   | 3.61      | 0.984              |
| 5IG9    | 24              | 3-G                                   | 4     | 0.9525   | 3.68      | 0.984              |
| 5IG9    | 24              | 4-G                                   | 5     | 0.9478   | 3.74      | 0.984              |

| PDB ID: | Recycle Number: | Model Number and PDB Reference Chain: | Rank: | TMscore: | RMSD (Å): | Sequence Identity: |
|---------|-----------------|---------------------------------------|-------|----------|-----------|--------------------|
| 5IG9    | 24              | 5-G                                   | 3     | 0.9554   | 3.68      | 0.984              |
| 5IG9    | 24              | 1-H                                   | 2     | 0.9891   | 0.63      | 0.981              |
| 5IG9    | 24              | 2-H                                   | 1     | 0.9895   | 0.60      | 0.981              |
| 5IG9    | 24              | 3-H                                   | 4     | 0.9697   | 1.16      | 0.981              |
| 5IG9    | 24              | 4-H                                   | 5     | 0.9624   | 1.34      | 0.981              |
| 5IG9    | 24              | 5-H                                   | 3     | 0.9742   | 1.04      | 0.981              |
| 7DRM    | 24              | 1-A                                   | 4     | 0.9435   | 2.55      | 1.000              |
| 7DRM    | 24              | 2-A                                   | 2     | 0.9478   | 2.48      | 1.000              |
| 7DRM    | 24              | 3-A                                   | 1     | 0.9442   | 2.51      | 1.000              |
| 7DRM    | 24              | 4-A                                   | 3     | 0.9238   | 2.80      | 1.000              |
| 7DRM    | 24              | 5-A                                   | 5     | 0.9092   | 2.86      | 1.000              |
| 7DRM    | 24              | 1-B                                   | 4     | 0.9548   | 1.54      | 1.000              |
| 7DRM    | 24              | 2-B                                   | 2     | 0.9507   | 1.59      | 1.000              |
| 7DRM    | 24              | 3-B                                   | 1     | 0.9566   | 1.52      | 1.000              |
| 7DRM    | 24              | 4-B                                   | 3     | 0.9421   | 1.86      | 1.000              |
| 7DRM    | 24              | 5-B                                   | 5     | 0.9414   | 1.80      | 1.000              |
| 7DRM    | 24              | 1-C                                   | 4     | 0.9420   | 2.54      | 1.000              |
| 7DRM    | 24              | 2-C                                   | 2     | 0.9466   | 2.47      | 1.000              |
| 7DRM    | 24              | 3-C                                   | 1     | 0.9428   | 2.50      | 1.000              |
| 7DRM    | 24              | 4-C                                   | 3     | 0.9224   | 2.77      | 1.000              |
| 7DRM    | 24              | 5-C                                   | 5     | 0.9070   | 2.86      | 1.000              |
| 7DRM    | 24              | 1-D                                   | 4     | 0.9250   | 2.94      | 0.994              |
| 7DRM    | 24              | 2-D                                   | 2     | 0.9225   | 2.94      | 0.994              |
| 7DRM    | 24              | 3-D                                   | 1     | 0.9259   | 2.93      | 0.994              |
| 7DRM    | 24              | 4-D                                   | 3     | 0.9099   | 3.15      | 0.994              |
| 7DRM    | 24              | 5-D                                   | 5     | 0.9077   | 3.11      | 0.994              |
| 7M4S    | 24              | 1-A                                   | 5     | 0.9161   | 2.93      | 1.000              |
| 7M4S    | 24              | 2-A                                   | 1     | 0.9200   | 2.83      | 1.000              |
| 7M4S    | 24              | 3-A                                   | 2     | 0.9192   | 2.88      | 1.000              |
| 7M4S    | 24              | 4-A                                   | 3     | 0.9168   | 2.87      | 1.000              |
| 7M4S    | 24              | 5-A                                   | 4     | 0.9183   | 2.76      | 1.000              |
| 7M4S    | 24              | 1-B                                   | 5     | 0.9212   | 2.65      | 1.000              |
| 7M4S    | 24              | 2-B                                   | 1     | 0.9240   | 2.58      | 1.000              |
| 7M4S    | 24              | 3-B                                   | 2     | 0.9207   | 2.61      | 1.000              |
| 7M4S    | 24              | 4-B                                   | 3     | 0.9168   | 2.67      | 1.000              |
| 7M4S    | 24              | 5-B                                   | 4     | 0.9202   | 2.53      | 1.000              |
| 7M4S    | 24              | 1-C                                   | 5     | 0.9180   | 3.59      | 1.000              |
| 7M4S    | 24              | 2-C                                   | 1     | 0.9212   | 3.54      | 1.000              |
| 7M4S    | 24              | 3-C                                   | 2     | 0.9232   | 3.48      | 1.000              |
| 7M4S    | 24              | 4-C                                   | 3     | 0.9202   | 3.56      | 1.000              |
| 7M4S    | 24              | 5-C                                   | 4     | 0.9186   | 3.57      | 1.000              |
| 7M4S    | 24              | 1-D                                   | 5     | 0.9291   | 4.05      | 1.000              |
| 7M4S    | 24              | 2-D                                   | 1     | 0.9338   | 3.99      | 1.000              |
| 7M4S    | 24              | 3-D                                   | 2     | 0.9336   | 3.97      | 1.000              |
| 7M4S    | 24              | 4-D                                   | 3     | 0.9302   | 4.03      | 1.000              |
| 7M4S    | 24              | 5-D                                   | 4     | 0.9319   | 4.01      | 1.000              |
| 7MGV    | 24              | 1-A                                   | 5     | 0.9247   | 4.14      | 1.000              |
| 7MGV    | 24              | 2-A                                   | 4     | 0.9177   | 4.24      | 1.000              |
| 7MGV    | 24              | 3-A                                   | 1     | 0.9254   | 4.08      | 1.000              |
| 7MGV    | 24              | 4-A                                   | 3     | 0.9247   | 4.29      | 1.000              |
| 7MGV    | 24              | 5-A                                   | 2     | 0.9280   | 4.04      | 1.000              |
| 7MGV    | 24              | 1-B                                   | 5     | 0.9805   | 0.97      | 1.000              |
| 7MGV    | 24              | 2-B                                   | 4     | 0.9734   | 1.14      | 1.000              |
| 7MGV    | 24              | 3-B                                   | 1     | 0.9822   | 0.92      | 1.000              |
| 7MGV    | 24              | 4-B                                   | 3     | 0.9622   | 1.62      | 1.000              |
| 7MGV    | 24              | 5-B                                   | 2     | 0.9833   | 0.89      | 1.000              |
| 3VPB    | 48              | 1-A                                   | 3     | 0.9919   | 0.57      | 1.000              |
| 3VPB    | 48              | 2-A                                   | 1     | 0.9920   | 0.56      | 1.000              |
| 3VPB    | 48              | 3-A                                   | 2     | 0.9914   | 0.58      | 1.000              |
| 3VPB    | 48              | 4-A                                   | 5     | 0.9899   | 0.63      | 1.000              |
| 3VPB    | 48              | 5-A                                   | 4     | 0.9899   | 0.63      | 1.000              |
| 3VPB    | 48              | 1-B                                   | 3     | 0.9914   | 0.59      | 1.000              |
| 3VPB    | 48              | 2-B                                   | 1     | 0.9913   | 0.59      | 1.000              |
| 3VPB    | 48              | 3-B                                   | 2     | 0.9907   | 0.61      | 1.000              |



| PDB ID: | Recycle Number: | Model Number and PDB Reference Chain: | Rank: | TMscore: | RMSD (Å): | Sequence Identity: |
|---------|-----------------|---------------------------------------|-------|----------|-----------|--------------------|
| 3VPB    | 48              | 4-B                                   | 5     | 0.9892   | 0.66      | 1.000              |
| 3VPB    | 48              | 5-B                                   | 4     | 0.9892   | 0.66      | 1.000              |
| 3VPB    | 48              | 1-C                                   | 3     | 0.9977   | 0.30      | 1.000              |
| 3VPB    | 48              | 2-C                                   | 1     | 0.9978   | 0.29      | 1.000              |
| 3VPB    | 48              | 3-C                                   | 2     | 0.9936   | 0.50      | 1.000              |
| 3VPB    | 48              | 4-C                                   | 5     | 0.9945   | 0.47      | 1.000              |
| 3VPB    | 48              | 5-C                                   | 4     | 0.9932   | 0.52      | 1.000              |
| 3VPB    | 48              | 1-D                                   | 3     | 0.9977   | 0.29      | 1.000              |
| 3VPB    | 48              | 2-D                                   | 1     | 0.9979   | 0.29      | 1.000              |
| 3VPB    | 48              | 3-D                                   | 2     | 0.9939   | 0.49      | 1.000              |
| 3VPB    | 48              | 4-D                                   | 5     | 0.9945   | 0.46      | 1.000              |
| 3VPB    | 48              | 5-D                                   | 4     | 0.9934   | 0.51      | 1.000              |
| 3VPD    | 48              | 1-A                                   | 2     | 0.9935   | 0.55      | 1.000              |
| 3VPD    | 48              | 2-A                                   | 1     | 0.9927   | 0.59      | 1.000              |
| 3VPD    | 48              | 3-A                                   | 3     | 0.9796   | 0.94      | 1.000              |
| 3VPD    | 48              | 4-A                                   | 4     | 0.9823   | 0.88      | 1.000              |
| 3VPD    | 48              | 5-A                                   | 5     | 0.9811   | 0.91      | 1.000              |
| 3VPD    | 48              | 1-B                                   | 2     | 0.9877   | 0.71      | 1.000              |
| 3VPD    | 48              | 2-B                                   | 1     | 0.9875   | 0.72      | 1.000              |
| 3VPD    | 48              | 3-B                                   | 3     | 0.9872   | 0.73      | 1.000              |
| 3VPD    | 48              | 4-B                                   | 4     | 0.9879   | 0.71      | 1.000              |
| 3VPD    | 48              | 5-B                                   | 5     | 0.9861   | 0.75      | 1.000              |
| 5IG8    | 48              | 1-A                                   | 5     | 0.9135   | 3.13      | 1.000              |
| 5IG8    | 48              | 2-A                                   | 2     | 0.9164   | 3.03      | 1.000              |
| 5IG8    | 48              | 3-A                                   | 1     | 0.8829   | 3.99      | 1.000              |
| 5IG8    | 48              | 4-A                                   | 4     | 0.8816   | 3.95      | 1.000              |
| 5IG8    | 48              | 5-A                                   | 3     | 0.8854   | 3.79      | 1.000              |
| 5IG8    | 48              | 1-B                                   | 5     | 0.9928   | 0.50      | 1.000              |
| 5IG8    | 48              | 2-B                                   | 2     | 0.9920   | 0.53      | 1.000              |
| 5IG8    | 48              | 3-B                                   | 1     | 0.9820   | 0.80      | 1.000              |
| 5IG8    | 48              | 4-B                                   | 4     | 0.9787   | 0.87      | 1.000              |
| 5IG8    | 48              | 5-B                                   | 3     | 0.9810   | 0.82      | 1.000              |
| 5IG9    | 48              | 1-A                                   | 2     | 0.9619   | 3.80      | 0.981              |
| 5IG9    | 48              | 2-A                                   | 1     | 0.9604   | 3.80      | 0.981              |
| 5IG9    | 48              | 3-A                                   | 3     | 0.9459   | 3.93      | 0.981              |
| 5IG9    | 48              | 4-A                                   | 5     | 0.9383   | 4.02      | 0.981              |
| 5IG9    | 48              | 5-A                                   | 4     | 0.9472   | 3.96      | 0.981              |
| 5IG9    | 48              | 1-B                                   | 2     | 0.9900   | 0.84      | 0.980              |
| 5IG9    | 48              | 2-B                                   | 1     | 0.9897   | 0.85      | 0.980              |
| 5IG9    | 48              | 3-B                                   | 3     | 0.9742   | 1.19      | 0.980              |
| 5IG9    | 48              | 4-B                                   | 5     | 0.9645   | 1.39      | 0.980              |
| 5IG9    | 48              | 5-B                                   | 4     | 0.9753   | 1.15      | 0.980              |
| 5IG9    | 48              | 1-C                                   | 2     | 0.9710   | 3.11      | 0.984              |
| 5IG9    | 48              | 2-C                                   | 1     | 0.9699   | 3.11      | 0.984              |
| 5IG9    | 48              | 3-C                                   | 3     | 0.9563   | 3.24      | 0.984              |
| 5IG9    | 48              | 4-C                                   | 5     | 0.9510   | 3.31      | 0.984              |
| 5IG9    | 48              | 5-C                                   | 4     | 0.9573   | 3.28      | 0.984              |
| 5IG9    | 48              | 1-D                                   | 2     | 0.9915   | 0.83      | 0.984              |
| 5IG9    | 48              | 2-D                                   | 1     | 0.9902   | 0.87      | 0.984              |
| 5IG9    | 48              | 3-D                                   | 3     | 0.9782   | 1.13      | 0.984              |
| 5IG9    | 48              | 4-D                                   | 5     | 0.9697   | 1.30      | 0.984              |
| 5IG9    | 48              | 5-D                                   | 4     | 0.9797   | 1.08      | 0.984              |
| 5IG9    | 48              | 1-E                                   | 2     | 0.9667   | 3.55      | 0.984              |
| 5IG9    | 48              | 2-E                                   | 1     | 0.9654   | 3.55      | 0.984              |
| 5IG9    | 48              | 3-E                                   | 3     | 0.9520   | 3.66      | 0.984              |
| 5IG9    | 48              | 4-E                                   | 5     | 0.9471   | 3.73      | 0.984              |
| 5IG9    | 48              | 5-E                                   | 4     | 0.9532   | 3.70      | 0.984              |
| 5IG9    | 48              | 1-F                                   | 2     | 0.9937   | 0.83      | 0.983              |
| 5IG9    | 48              | 2-F                                   | 1     | 0.9927   | 0.86      | 0.983              |
| 5IG9    | 48              | 3-F                                   | 3     | 0.9804   | 1.13      | 0.983              |
| 5IG9    | 48              | 4-F                                   | 5     | 0.9734   | 1.27      | 0.983              |
| 5IG9    | 48              | 5-F                                   | 4     | 0.9817   | 1.09      | 0.983              |
| 5IG9    | 48              | 1-G                                   | 2     | 0.9683   | 3.54      | 0.984              |
| 5IG9    | 48              | 2-G                                   | 1     | 0.9673   | 3.54      | 0.984              |

| PDB ID: | Recycle Number: | Model Number and PDB Reference Chain: | Rank: | TMscore: | RMSD (Å): | Sequence Identity: |
|---------|-----------------|---------------------------------------|-------|----------|-----------|--------------------|
| 5IG9    | 48              | 3-G                                   | 3     | 0.9543   | 3.66      | 0.984              |
| 5IG9    | 48              | 4-G                                   | 5     | 0.9488   | 3.73      | 0.984              |
| 5IG9    | 48              | 5-G                                   | 4     | 0.9553   | 3.70      | 0.984              |
| 5IG9    | 48              | 1-H                                   | 2     | 0.9881   | 0.67      | 0.981              |
| 5IG9    | 48              | 2-H                                   | 1     | 0.9877   | 0.68      | 0.981              |
| 5IG9    | 48              | 3-H                                   | 3     | 0.9723   | 1.09      | 0.981              |
| 5IG9    | 48              | 4-H                                   | 5     | 0.9631   | 1.32      | 0.981              |
| 5IG9    | 48              | 5-H                                   | 4     | 0.9743   | 1.03      | 0.981              |
| 7DRM    | 48              | 1-A                                   | 2     | 0.9775   | 2.09      | 1.000              |
| 7DRM    | 48              | 2-A                                   | 1     | 0.9774   | 2.11      | 1.000              |
| 7DRM    | 48              | 3-A                                   | 3     | 0.9447   | 2.51      | 1.000              |
| 7DRM    | 48              | 4-A                                   | 4     | 0.9288   | 2.63      | 1.000              |
| 7DRM    | 48              | 5-A                                   | 5     | 0.9357   | 2.51      | 1.000              |
| 7DRM    | 48              | 1-B                                   | 2     | 0.9591   | 1.46      | 1.000              |
| 7DRM    | 48              | 2-B                                   | 1     | 0.9584   | 1.47      | 1.000              |
| 7DRM    | 48              | 3-B                                   | 3     | 0.9549   | 1.57      | 1.000              |
| 7DRM    | 48              | 4-B                                   | 4     | 0.9469   | 1.61      | 1.000              |
| 7DRM    | 48              | 5-B                                   | 5     | 0.9559   | 1.46      | 1.000              |
| 7DRM    | 48              | 1-C                                   | 2     | 0.9760   | 2.10      | 1.000              |
| 7DRM    | 48              | 2-C                                   | 1     | 0.9761   | 2.12      | 1.000              |
| 7DRM    | 48              | 3-C                                   | 3     | 0.9432   | 2.49      | 1.000              |
| 7DRM    | 48              | 4-C                                   | 4     | 0.9263   | 2.64      | 1.000              |
| 7DRM    | 48              | 5-C                                   | 5     | 0.9326   | 2.53      | 1.000              |
| 7DRM    | 48              | 1-D                                   | 2     | 0.9331   | 2.84      | 0.994              |
| 7DRM    | 48              | 2-D                                   | 1     | 0.9324   | 2.84      | 0.994              |
| 7DRM    | 48              | 3-D                                   | 3     | 0.9236   | 2.98      | 0.994              |
| 7DRM    | 48              | 4-D                                   | 4     | 0.9141   | 3.02      | 0.994              |
| 7DRM    | 48              | 5-D                                   | 5     | 0.9256   | 2.85      | 0.994              |
| 7M4S    | 48              | 1-A                                   | 3     | 0.9343   | 2.67      | 1.000              |
| 7M4S    | 48              | 2-A                                   | 1     | 0.9310   | 2.69      | 1.000              |
| 7M4S    | 48              | 3-A                                   | 2     | 0.9214   | 2.82      | 1.000              |
| 7M4S    | 48              | 4-A                                   | 4     | 0.9206   | 2.85      | 1.000              |
| 7M4S    | 48              | 5-A                                   | 5     | 0.9200   | 2.70      | 1.000              |
| 7M4S    | 48              | 1-B                                   | 3     | 0.9409   | 2.40      | 1.000              |
| 7M4S    | 48              | 2-B                                   | 1     | 0.9375   | 2.42      | 1.000              |
| 7M4S    | 48              | 3-B                                   | 2     | 0.9225   | 2.56      | 1.000              |
| 7M4S    | 48              | 4-B                                   | 4     | 0.9200   | 2.64      | 1.000              |
| 7M4S    | 48              | 5-B                                   | 5     | 0.9215   | 2.50      | 1.000              |
| 7M4S    | 48              | 1-C                                   | 3     | 0.9267   | 3.54      | 1.000              |
| 7M4S    | 48              | 2-C                                   | 1     | 0.9261   | 3.51      | 1.000              |
| 7M4S    | 48              | 3-C                                   | 2     | 0.9244   | 3.46      | 1.000              |
| 7M4S    | 48              | 4-C                                   | 4     | 0.9221   | 3.56      | 1.000              |
| 7M4S    | 48              | 5-C                                   | 5     | 0.9188   | 3.58      | 1.000              |
| 7M4S    | 48              | 1-D                                   | 3     | 0.9415   | 3.97      | 1.000              |
| 7M4S    | 48              | 2-D                                   | 1     | 0.9408   | 3.93      | 1.000              |
| 7M4S    | 48              | 3-D                                   | 2     | 0.9356   | 3.94      | 1.000              |
| 7M4S    | 48              | 4-D                                   | 4     | 0.9341   | 4.02      | 1.000              |
| 7M4S    | 48              | 5-D                                   | 5     | 0.9326   | 4.02      | 1.000              |
| 7MGV    | 48              | 1-A                                   | 2     | 0.9355   | 4.00      | 1.000              |
| 7MGV    | 48              | 2-A                                   | 1     | 0.9333   | 4.02      | 1.000              |
| 7MGV    | 48              | 3-A                                   | 3     | 0.9256   | 4.06      | 1.000              |
| 7MGV    | 48              | 4-A                                   | 5     | 0.9241   | 4.28      | 1.000              |
| 7MGV    | 48              | 5-A                                   | 4     | 0.9290   | 3.98      | 1.000              |
| 7MGV    | 48              | 1-B                                   | 2     | 0.9965   | 0.42      | 1.000              |
| 7MGV    | 48              | 2-B                                   | 1     | 0.9948   | 0.50      | 1.000              |
| 7MGV    | 48              | 3-B                                   | 3     | 0.9818   | 0.93      | 1.000              |
| 7MGV    | 48              | 4-B                                   | 5     | 0.9610   | 1.63      | 1.000              |
| 7MGV    | 48              | 5-B                                   | 4     | 0.9828   | 0.90      | 1.000              |

**Table S3.** Monomer ATP Grasp Ligase RiPP biosynthetic enzyme US-align results with template and AMBER. Enzymes with multiple available reference subunits are denoted with their corresponding chain letters.

| PDB ID: | Recycle Number: | Model Number and PDB Reference Chain: | Rank: | TMscore: | RMSD(Å): | Sequence Identity: |
|---------|-----------------|---------------------------------------|-------|----------|----------|--------------------|
| 3VPB    | 3               | 1-A                                   | 3     | 0.9905   | 0.61     | 1.000              |
| 3VPB    | 3               | 2-A                                   | 4     | 0.9911   | 0.59     | 1.000              |
| 3VPB    | 3               | 3-A                                   | 1     | 0.9917   | 0.57     | 1.000              |
| 3VPB    | 3               | 4-A                                   | 5     | 0.9885   | 0.67     | 1.000              |
| 3VPB    | 3               | 5-A                                   | 2     | 0.9895   | 0.65     | 1.000              |
| 3VPB    | 3               | 1-B                                   | 3     | 0.9899   | 0.64     | 1.000              |
| 3VPB    | 3               | 2-B                                   | 4     | 0.9906   | 0.61     | 1.000              |
| 3VPB    | 3               | 3-B                                   | 1     | 0.9911   | 0.60     | 1.000              |
| 3VPB    | 3               | 4-B                                   | 5     | 0.9879   | 0.70     | 1.000              |
| 3VPB    | 3               | 5-B                                   | 2     | 0.9889   | 0.67     | 1.000              |
| 3VPB    | 3               | 1-C                                   | 3     | 0.9924   | 0.55     | 1.000              |
| 3VPB    | 3               | 2-C                                   | 4     | 0.9934   | 0.51     | 1.000              |
| 3VPB    | 3               | 3-C                                   | 1     | 0.9938   | 0.49     | 1.000              |
| 3VPB    | 3               | 4-C                                   | 5     | 0.9939   | 0.49     | 1.000              |
| 3VPB    | 3               | 5-C                                   | 2     | 0.9916   | 0.57     | 1.000              |
| 3VPB    | 3               | 1-D                                   | 3     | 0.9927   | 0.54     | 1.000              |
| 3VPB    | 3               | 2-D                                   | 4     | 0.9937   | 0.50     | 1.000              |
| 3VPB    | 3               | 3-D                                   | 1     | 0.9941   | 0.48     | 1.000              |
| 3VPB    | 3               | 4-D                                   | 5     | 0.9940   | 0.49     | 1.000              |
| 3VPB    | 3               | 5-D                                   | 2     | 0.9921   | 0.56     | 1.000              |
| 3VPD    | 3               | 1-A                                   | 3     | 0.9939   | 0.54     | 1.000              |
| 3VPD    | 3               | 2-A                                   | 1     | 0.9931   | 0.57     | 1.000              |
| 3VPD    | 3               | 3-A                                   | 2     | 0.9821   | 0.88     | 1.000              |
| 3VPD    | 3               | 4-A                                   | 4     | 0.9834   | 0.85     | 1.000              |
| 3VPD    | 3               | 5-A                                   | 5     | 0.9813   | 0.90     | 1.000              |
| 3VPD    | 3               | 1-B                                   | 3     | 0.9895   | 0.65     | 1.000              |
| 3VPD    | 3               | 2-B                                   | 1     | 0.9890   | 0.67     | 1.000              |
| 3VPD    | 3               | 3-B                                   | 2     | 0.9882   | 0.70     | 1.000              |
| 3VPD    | 3               | 4-B                                   | 4     | 0.9878   | 0.71     | 1.000              |
| 3VPD    | 3               | 5-B                                   | 5     | 0.9858   | 0.76     | 1.000              |
| 5IG8    | 3               | 1-A                                   | 5     | 0.9196   | 3.05     | 1.000              |
| 5IG8    | 3               | 2-A                                   | 3     | 0.9219   | 2.88     | 1.000              |
| 5IG8    | 3               | 3-A                                   | 1     | 0.8866   | 3.56     | 1.000              |
| 5IG8    | 3               | 4-A                                   | 4     | 0.8806   | 3.97     | 1.000              |
| 5IG8    | 3               | 5-A                                   | 2     | 0.8856   | 3.82     | 1.000              |
| 5IG8    | 3               | 1-B                                   | 5     | 0.9921   | 0.54     | 1.000              |
| 5IG8    | 3               | 2-B                                   | 3     | 0.9915   | 0.56     | 1.000              |
| 5IG8    | 3               | 3-B                                   | 1     | 0.9818   | 0.80     | 1.000              |
| 5IG8    | 3               | 4-B                                   | 4     | 0.9813   | 0.81     | 1.000              |
| 5IG8    | 3               | 5-B                                   | 2     | 0.9800   | 0.84     | 1.000              |
| 5IG9    | 3               | 1-A                                   | 2     | 0.9584   | 3.88     | 0.981              |
| 5IG9    | 3               | 2-A                                   | 1     | 0.9574   | 3.90     | 0.981              |
| 5IG9    | 3               | 3-A                                   | 3     | 0.9449   | 3.94     | 0.981              |
| 5IG9    | 3               | 4-A                                   | 5     | 0.9411   | 3.96     | 0.981              |
| 5IG9    | 3               | 5-A                                   | 4     | 0.9464   | 3.95     | 0.981              |
| 5IG9    | 3               | 1-B                                   | 2     | 0.9884   | 0.89     | 0.980              |
| 5IG9    | 3               | 2-B                                   | 1     | 0.9886   | 0.89     | 0.980              |
| 5IG9    | 3               | 3-B                                   | 3     | 0.9726   | 1.22     | 0.980              |
| 5IG9    | 3               | 4-B                                   | 5     | 0.9678   | 1.32     | 0.980              |
| 5IG9    | 3               | 5-B                                   | 4     | 0.9748   | 1.18     | 0.980              |
| 5IG9    | 3               | 1-C                                   | 2     | 0.9674   | 3.17     | 0.984              |
| 5IG9    | 3               | 2-C                                   | 1     | 0.9667   | 3.19     | 0.984              |
| 5IG9    | 3               | 3-C                                   | 3     | 0.9551   | 3.25     | 0.984              |
| 5IG9    | 3               | 4-C                                   | 5     | 0.9528   | 3.25     | 0.984              |
| 5IG9    | 3               | 5-C                                   | 4     | 0.9561   | 3.25     | 0.984              |
| 5IG9    | 3               | 1-D                                   | 2     | 0.9900   | 0.87     | 0.984              |
| 5IG9    | 3               | 2-D                                   | 1     | 0.9897   | 0.88     | 0.984              |
| 5IG9    | 3               | 3-D                                   | 3     | 0.9770   | 1.15     | 0.984              |
| 5IG9    | 3               | 4-D                                   | 5     | 0.9729   | 1.23     | 0.984              |
| 5IG9    | 3               | 5-D                                   | 4     | 0.9779   | 1.14     | 0.984              |
| 5IG9    | 3               | 1-E                                   | 2     | 0.9634   | 3.62     | 0.984              |
| 5IG9    | 3               | 2-E                                   | 1     | 0.9625   | 3.64     | 0.984              |
| 5IG9    | 3               | 3-E                                   | 3     | 0.9510   | 3.68     | 0.984              |

| PDB ID: | Recycle Number: | Model Number and PDB Reference Chain: | Rank: | TMscore: | RMSD(Å): | Sequence Identity: |
|---------|-----------------|---------------------------------------|-------|----------|----------|--------------------|
| 5IG9    | 3               | 4-E                                   | 5     | 0.9487   | 3.69     | 0.984              |
| 5IG9    | 3               | 5-E                                   | 4     | 0.9520   | 3.68     | 0.984              |
| 5IG9    | 3               | 1-F                                   | 2     | 0.9922   | 0.88     | 0.983              |
| 5IG9    | 3               | 2-F                                   | 1     | 0.9920   | 0.89     | 0.983              |
| 5IG9    | 3               | 3-F                                   | 3     | 0.9791   | 1.16     | 0.983              |
| 5IG9    | 3               | 4-F                                   | 5     | 0.9760   | 1.21     | 0.983              |
| 5IG9    | 3               | 5-F                                   | 4     | 0.9800   | 1.14     | 0.983              |
| 5IG9    | 3               | 1-G                                   | 2     | 0.9648   | 3.62     | 0.984              |
| 5IG9    | 3               | 2-G                                   | 1     | 0.9641   | 3.64     | 0.984              |
| 5IG9    | 3               | 3-G                                   | 3     | 0.9529   | 3.68     | 0.984              |
| 5IG9    | 3               | 4-G                                   | 5     | 0.9507   | 3.68     | 0.984              |
| 5IG9    | 3               | 5-G                                   | 4     | 0.9542   | 3.68     | 0.984              |
| 5IG9    | 3               | 1-H                                   | 2     | 0.9868   | 0.72     | 0.981              |
| 5IG9    | 3               | 2-H                                   | 1     | 0.9872   | 0.69     | 0.981              |
| 5IG9    | 3               | 3-H                                   | 3     | 0.9710   | 1.12     | 0.981              |
| 5IG9    | 3               | 4-H                                   | 5     | 0.9655   | 1.26     | 0.981              |
| 5IG9    | 3               | 5-H                                   | 4     | 0.9729   | 1.07     | 0.981              |
| 7DRM    | 3               | 1-A                                   | 5     | 0.9450   | 2.52     | 1.000              |
| 7DRM    | 3               | 2-A                                   | 2     | 0.9493   | 2.45     | 1.000              |
| 7DRM    | 3               | 3-A                                   | 1     | 0.9475   | 2.44     | 1.000              |
| 7DRM    | 3               | 4-A                                   | 3     | 0.9312   | 2.68     | 1.000              |
| 7DRM    | 3               | 5-A                                   | 4     | 0.9242   | 2.68     | 1.000              |
| 7DRM    | 3               | 1-B                                   | 5     | 0.9553   | 1.52     | 1.000              |
| 7DRM    | 3               | 2-B                                   | 2     | 0.9512   | 1.60     | 1.000              |
| 7DRM    | 3               | 3-B                                   | 1     | 0.9556   | 1.52     | 1.000              |
| 7DRM    | 3               | 4-B                                   | 3     | 0.9463   | 1.76     | 1.000              |
| 7DRM    | 3               | 5-B                                   | 4     | 0.9500   | 1.66     | 1.000              |
| 7DRM    | 3               | 1-C                                   | 5     | 0.9434   | 2.51     | 1.000              |
| 7DRM    | 3               | 2-C                                   | 2     | 0.9479   | 2.45     | 1.000              |
| 7DRM    | 3               | 3-C                                   | 1     | 0.9461   | 2.43     | 1.000              |
| 7DRM    | 3               | 4-C                                   | 3     | 0.9297   | 2.66     | 1.000              |
| 7DRM    | 3               | 5-C                                   | 4     | 0.9220   | 2.68     | 1.000              |
| 7DRM    | 3               | 1-D                                   | 5     | 0.9261   | 2.91     | 0.994              |
| 7DRM    | 3               | 2-D                                   | 2     | 0.9230   | 2.93     | 0.994              |
| 7DRM    | 3               | 3-D                                   | 1     | 0.9260   | 2.90     | 0.994              |
| 7DRM    | 3               | 4-D                                   | 3     | 0.9150   | 3.06     | 0.994              |
| 7DRM    | 3               | 5-D                                   | 4     | 0.9173   | 2.99     | 0.994              |
| 7M4S    | 3               | 1-A                                   | 5     | 0.9175   | 2.88     | 1.000              |
| 7M4S    | 3               | 2-A                                   | 2     | 0.9213   | 2.81     | 1.000              |
| 7M4S    | 3               | 3-A                                   | 1     | 0.9173   | 2.84     | 1.000              |
| 7M4S    | 3               | 4-A                                   | 3     | 0.9113   | 2.94     | 1.000              |
| 7M4S    | 3               | 5-A                                   | 4     | 0.9115   | 2.99     | 1.000              |
| 7M4S    | 3               | 1-B                                   | 5     | 0.9220   | 2.64     | 1.000              |
| 7M4S    | 3               | 2-B                                   | 2     | 0.9254   | 2.57     | 1.000              |
| 7M4S    | 3               | 3-B                                   | 1     | 0.9163   | 2.65     | 1.000              |
| 7M4S    | 3               | 4-B                                   | 3     | 0.9111   | 2.76     | 1.000              |
| 7M4S    | 3               | 5-B                                   | 4     | 0.9107   | 2.76     | 1.000              |
| 7M4S    | 3               | 1-C                                   | 5     | 0.9192   | 3.57     | 1.000              |
| 7M4S    | 3               | 2-C                                   | 2     | 0.9232   | 3.52     | 1.000              |
| 7M4S    | 3               | 3-C                                   | 1     | 0.9218   | 3.44     | 1.000              |
| 7M4S    | 3               | 4-C                                   | 3     | 0.9171   | 3.54     | 1.000              |
| 7M4S    | 3               | 5-C                                   | 4     | 0.9152   | 3.58     | 1.000              |
| 7M4S    | 3               | 1-D                                   | 5     | 0.9311   | 4.02     | 1.000              |
| 7M4S    | 3               | 2-D                                   | 2     | 0.9368   | 3.97     | 1.000              |
| 7M4S    | 3               | 3-D                                   | 1     | 0.9335   | 3.91     | 1.000              |
| 7M4S    | 3               | 4-D                                   | 3     | 0.9273   | 4.00     | 1.000              |
| 7M4S    | 3               | 5-D                                   | 4     | 0.9273   | 4.03     | 1.000              |
| 7MGV    | 3               | 1-A                                   | 5     | 0.9263   | 4.11     | 1.000              |
| 7MGV    | 3               | 2-A                                   | 3     | 0.9192   | 4.21     | 1.000              |
| 7MGV    | 3               | 3-A                                   | 1     | 0.9244   | 4.09     | 1.000              |
| 7MGV    | 3               | 4-A                                   | 4     | 0.9227   | 4.31     | 1.000              |
| 7MGV    | 3               | 5-A                                   | 2     | 0.9242   | 4.14     | 1.000              |
| 7MGV    | 3               | 1-B                                   | 5     | 0.9827   | 0.91     | 1.000              |
| 7MGV    | 3               | 2-B                                   | 3     | 0.9754   | 1.09     | 1.000              |

| PDB ID: | Recycle Number: | Model Number and PDB Reference Chain: | Rank: | TMscore: | RMSD(Å): | Sequence Identity: |
|---------|-----------------|---------------------------------------|-------|----------|----------|--------------------|
| 7MGV    | 3               | 3-B                                   | 1     | 0.9809   | 0.95     | 1.000              |
| 7MGV    | 3               | 4-B                                   | 4     | 0.9616   | 1.58     | 1.000              |
| 7MGV    | 3               | 5-B                                   | 2     | 0.9817   | 0.93     | 1.000              |
| 3VPB    | 12              | 1-A                                   | 3     | 0.9906   | 0.61     | 1.000              |
| 3VPB    | 12              | 2-A                                   | 5     | 0.9910   | 0.60     | 1.000              |
| 3VPB    | 12              | 3-A                                   | 1     | 0.9914   | 0.58     | 1.000              |
| 3VPB    | 12              | 4-A                                   | 4     | 0.9900   | 0.63     | 1.000              |
| 3VPB    | 12              | 5-A                                   | 2     | 0.9885   | 0.68     | 1.000              |
| 3VPB    | 12              | 1-B                                   | 3     | 0.9899   | 0.64     | 1.000              |
| 3VPB    | 12              | 2-B                                   | 5     | 0.9904   | 0.62     | 1.000              |
| 3VPB    | 12              | 3-B                                   | 1     | 0.9909   | 0.60     | 1.000              |
| 3VPB    | 12              | 4-B                                   | 4     | 0.9895   | 0.65     | 1.000              |
| 3VPB    | 12              | 5-B                                   | 2     | 0.9879   | 0.70     | 1.000              |
| 3VPB    | 12              | 1-C                                   | 3     | 0.9928   | 0.53     | 1.000              |
| 3VPB    | 12              | 2-C                                   | 5     | 0.9937   | 0.49     | 1.000              |
| 3VPB    | 12              | 3-C                                   | 1     | 0.9934   | 0.51     | 1.000              |
| 3VPB    | 12              | 4-C                                   | 4     | 0.9944   | 0.47     | 1.000              |
| 3VPB    | 12              | 5-C                                   | 2     | 0.9915   | 0.58     | 1.000              |
| 3VPB    | 12              | 1-D                                   | 3     | 0.9930   | 0.52     | 1.000              |
| 3VPB    | 12              | 2-D                                   | 5     | 0.9941   | 0.48     | 1.000              |
| 3VPB    | 12              | 3-D                                   | 1     | 0.9938   | 0.49     | 1.000              |
| 3VPB    | 12              | 4-D                                   | 4     | 0.9945   | 0.46     | 1.000              |
| 3VPB    | 12              | 5-D                                   | 2     | 0.9918   | 0.57     | 1.000              |
| 3VPD    | 12              | 1-A                                   | 3     | 0.9939   | 0.54     | 1.000              |
| 3VPD    | 12              | 2-A                                   | 1     | 0.9929   | 0.58     | 1.000              |
| 3VPD    | 12              | 3-A                                   | 2     | 0.9802   | 0.93     | 1.000              |
| 3VPD    | 12              | 4-A                                   | 4     | 0.9830   | 0.86     | 1.000              |
| 3VPD    | 12              | 5-A                                   | 5     | 0.9807   | 0.92     | 1.000              |
| 3VPD    | 12              | 1-B                                   | 3     | 0.9898   | 0.65     | 1.000              |
| 3VPD    | 12              | 2-B                                   | 1     | 0.9892   | 0.67     | 1.000              |
| 3VPD    | 12              | 3-B                                   | 2     | 0.9878   | 0.72     | 1.000              |
| 3VPD    | 12              | 4-B                                   | 4     | 0.9883   | 0.70     | 1.000              |
| 3VPD    | 12              | 5-B                                   | 5     | 0.9865   | 0.74     | 1.000              |
| 5IG8    | 12              | 1-A                                   | 5     | 0.9195   | 3.05     | 1.000              |
| 5IG8    | 12              | 2-A                                   | 4     | 0.9229   | 2.82     | 1.000              |
| 5IG8    | 12              | 3-A                                   | 1     | 0.8829   | 3.92     | 1.000              |
| 5IG8    | 12              | 4-A                                   | 3     | 0.8814   | 3.94     | 1.000              |
| 5IG8    | 12              | 5-A                                   | 2     | 0.8868   | 3.73     | 1.000              |
| 5IG8    | 12              | 1-B                                   | 5     | 0.9922   | 0.53     | 1.000              |
| 5IG8    | 12              | 2-B                                   | 4     | 0.9917   | 0.55     | 1.000              |
| 5IG8    | 12              | 3-B                                   | 1     | 0.9812   | 0.81     | 1.000              |
| 5IG8    | 12              | 4-B                                   | 3     | 0.9798   | 0.84     | 1.000              |
| 5IG8    | 12              | 5-B                                   | 2     | 0.9804   | 0.83     | 1.000              |
| 5IG9    | 12              | 1-A                                   | 2     | 0.9600   | 3.87     | 0.981              |
| 5IG9    | 12              | 2-A                                   | 1     | 0.9600   | 3.87     | 0.981              |
| 5IG9    | 12              | 3-A                                   | 3     | 0.9430   | 3.97     | 0.981              |
| 5IG9    | 12              | 4-A                                   | 5     | 0.9370   | 4.03     | 0.981              |
| 5IG9    | 12              | 5-A                                   | 4     | 0.9481   | 3.94     | 0.981              |
| 5IG9    | 12              | 1-B                                   | 2     | 0.9904   | 0.82     | 0.980              |
| 5IG9    | 12              | 2-B                                   | 1     | 0.9909   | 0.81     | 0.980              |
| 5IG9    | 12              | 3-B                                   | 3     | 0.9708   | 1.27     | 0.980              |
| 5IG9    | 12              | 4-B                                   | 5     | 0.9640   | 1.41     | 0.980              |
| 5IG9    | 12              | 5-B                                   | 4     | 0.9763   | 1.14     | 0.980              |
| 5IG9    | 12              | 1-C                                   | 2     | 0.9691   | 3.16     | 0.984              |
| 5IG9    | 12              | 2-C                                   | 1     | 0.9692   | 3.16     | 0.984              |
| 5IG9    | 12              | 3-C                                   | 3     | 0.9539   | 3.27     | 0.984              |
| 5IG9    | 12              | 4-C                                   | 5     | 0.9502   | 3.31     | 0.984              |
| 5IG9    | 12              | 5-C                                   | 4     | 0.9576   | 3.26     | 0.984              |
| 5IG9    | 12              | 1-D                                   | 2     | 0.9920   | 0.80     | 0.984              |
| 5IG9    | 12              | 2-D                                   | 1     | 0.9918   | 0.81     | 0.984              |
| 5IG9    | 12              | 3-D                                   | 3     | 0.9755   | 1.19     | 0.984              |
| 5IG9    | 12              | 4-D                                   | 5     | 0.9692   | 1.31     | 0.984              |
| 5IG9    | 12              | 5-D                                   | 4     | 0.9801   | 1.08     | 0.984              |
| 5IG9    | 12              | 1-E                                   | 2     | 0.9650   | 3.62     | 0.984              |

| PDB ID: | Recycle Number: | Model Number and PDB Reference Chain: | Rank: | TMscore: | RMSD(Å): | Sequence Identity: |
|---------|-----------------|---------------------------------------|-------|----------|----------|--------------------|
| 5IG9    | 12              | 2-E                                   | 1     | 0.9649   | 3.61     | 0.984              |
| 5IG9    | 12              | 3-E                                   | 3     | 0.9498   | 3.70     | 0.984              |
| 5IG9    | 12              | 4-E                                   | 5     | 0.9463   | 3.74     | 0.984              |
| 5IG9    | 12              | 5-E                                   | 4     | 0.9536   | 3.68     | 0.984              |
| 5IG9    | 12              | 1-F                                   | 2     | 0.9942   | 0.81     | 0.983              |
| 5IG9    | 12              | 2-F                                   | 1     | 0.9942   | 0.82     | 0.983              |
| 5IG9    | 12              | 3-F                                   | 3     | 0.9779   | 1.19     | 0.983              |
| 5IG9    | 12              | 4-F                                   | 5     | 0.9731   | 1.27     | 0.983              |
| 5IG9    | 12              | 5-F                                   | 4     | 0.9820   | 1.09     | 0.983              |
| 5IG9    | 12              | 1-G                                   | 2     | 0.9665   | 3.61     | 0.984              |
| 5IG9    | 12              | 2-G                                   | 1     | 0.9666   | 3.61     | 0.984              |
| 5IG9    | 12              | 3-G                                   | 3     | 0.9518   | 3.69     | 0.984              |
| 5IG9    | 12              | 4-G                                   | 5     | 0.9481   | 3.73     | 0.984              |
| 5IG9    | 12              | 5-G                                   | 4     | 0.9556   | 3.68     | 0.984              |
| 5IG9    | 12              | 1-H                                   | 2     | 0.9889   | 0.63     | 0.981              |
| 5IG9    | 12              | 2-H                                   | 1     | 0.9895   | 0.60     | 0.981              |
| 5IG9    | 12              | 3-H                                   | 3     | 0.9692   | 1.16     | 0.981              |
| 5IG9    | 12              | 4-H                                   | 5     | 0.9626   | 1.34     | 0.981              |
| 5IG9    | 12              | 5-H                                   | 4     | 0.9747   | 1.02     | 0.981              |
| 7DRM    | 12              | 1-A                                   | 5     | 0.9431   | 2.56     | 1.000              |
| 7DRM    | 12              | 2-A                                   | 3     | 0.9475   | 2.48     | 1.000              |
| 7DRM    | 12              | 3-A                                   | 1     | 0.9446   | 2.49     | 1.000              |
| 7DRM    | 12              | 4-A                                   | 2     | 0.9446   | 2.49     | 1.000              |
| 7DRM    | 12              | 5-A                                   | 4     | 0.9165   | 2.78     | 1.000              |
| 7DRM    | 12              | 1-B                                   | 5     | 0.9533   | 1.56     | 1.000              |
| 7DRM    | 12              | 2-B                                   | 3     | 0.9489   | 1.63     | 1.000              |
| 7DRM    | 12              | 3-B                                   | 1     | 0.9564   | 1.52     | 1.000              |
| 7DRM    | 12              | 4-B                                   | 2     | 0.9421   | 1.87     | 1.000              |
| 7DRM    | 12              | 5-B                                   | 4     | 0.9453   | 1.74     | 1.000              |
| 7DRM    | 12              | 1-C                                   | 5     | 0.9415   | 2.55     | 1.000              |
| 7DRM    | 12              | 2-C                                   | 3     | 0.9463   | 2.48     | 1.000              |
| 7DRM    | 12              | 3-C                                   | 1     | 0.9432   | 2.48     | 1.000              |
| 7DRM    | 12              | 4-C                                   | 2     | 0.9250   | 2.73     | 1.000              |
| 7DRM    | 12              | 5-C                                   | 4     | 0.9143   | 2.77     | 1.000              |
| 7DRM    | 12              | 1-D                                   | 5     | 0.9237   | 2.95     | 0.994              |
| 7DRM    | 12              | 2-D                                   | 3     | 0.9208   | 2.96     | 0.994              |
| 7DRM    | 12              | 3-D                                   | 1     | 0.9259   | 2.92     | 0.994              |
| 7DRM    | 12              | 4-D                                   | 2     | 0.9103   | 3.15     | 0.994              |
| 7DRM    | 12              | 5-D                                   | 4     | 0.9121   | 3.06     | 0.994              |
| 7M4S    | 12              | 1-A                                   | 4     | 0.9162   | 2.92     | 1.000              |
| 7M4S    | 12              | 2-A                                   | 1     | 0.9205   | 2.83     | 1.000              |
| 7M4S    | 12              | 3-A                                   | 2     | 0.9183   | 2.85     | 1.000              |
| 7M4S    | 12              | 4-A                                   | 3     | 0.9166   | 2.84     | 1.000              |
| 7M4S    | 12              | 5-A                                   | 5     | 0.9186   | 2.79     | 1.000              |
| 7M4S    | 12              | 1-B                                   | 4     | 0.9206   | 2.66     | 1.000              |
| 7M4S    | 12              | 2-B                                   | 1     | 0.9236   | 2.60     | 1.000              |
| 7M4S    | 12              | 3-B                                   | 2     | 0.9194   | 2.60     | 1.000              |
| 7M4S    | 12              | 4-B                                   | 3     | 0.9160   | 2.66     | 1.000              |
| 7M4S    | 12              | 5-B                                   | 5     | 0.9195   | 2.56     | 1.000              |
| 7M4S    | 12              | 1-C                                   | 4     | 0.9190   | 3.56     | 1.000              |
| 7M4S    | 12              | 2-C                                   | 1     | 0.9226   | 3.52     | 1.000              |
| 7M4S    | 12              | 3-C                                   | 2     | 0.9224   | 3.46     | 1.000              |
| 7M4S    | 12              | 4-C                                   | 3     | 0.9203   | 3.54     | 1.000              |
| 7M4S    | 12              | 5-C                                   | 5     | 0.9194   | 3.57     | 1.000              |
| 7M4S    | 12              | 1-D                                   | 4     | 0.9302   | 4.02     | 1.000              |
| 7M4S    | 12              | 2-D                                   | 1     | 0.9354   | 3.97     | 1.000              |
| 7M4S    | 12              | 3-D                                   | 2     | 0.9333   | 3.94     | 1.000              |
| 7M4S    | 12              | 4-D                                   | 3     | 0.9304   | 4.01     | 1.000              |
| 7M4S    | 12              | 5-D                                   | 5     | 0.9329   | 4.02     | 1.000              |
| 7MGV    | 12              | 1-A                                   | 4     | 0.9248   | 4.13     | 1.000              |
| 7MGV    | 12              | 2-A                                   | 5     | 0.9189   | 4.23     | 1.000              |
| 7MGV    | 12              | 3-A                                   | 1     | 0.9245   | 4.09     | 1.000              |
| 7MGV    | 12              | 4-A                                   | 3     | 0.9242   | 4.28     | 1.000              |
| 7MGV    | 12              | 5-A                                   | 2     | 0.9262   | 4.12     | 1.000              |

| PDB ID: | Recycle Number: | Model Number and PDB Reference Chain: | Rank: | TMscore: | RMSD(Å): | Sequence Identity: |
|---------|-----------------|---------------------------------------|-------|----------|----------|--------------------|
| 7MGV    | 12              | 1-B                                   | 4     | 0.9806   | 0.96     | 1.000              |
| 7MGV    | 12              | 2-B                                   | 5     | 0.9747   | 1.11     | 1.000              |
| 7MGV    | 12              | 3-B                                   | 1     | 0.9812   | 0.95     | 1.000              |
| 7MGV    | 12              | 4-B                                   | 3     | 0.9615   | 1.64     | 1.000              |
| 7MGV    | 12              | 5-B                                   | 2     | 0.9837   | 0.88     | 1.000              |
| 3VPB    | 24              | 1-A                                   | 3     | 0.9902   | 0.62     | 1.000              |
| 3VPB    | 24              | 2-A                                   | 5     | 0.9909   | 0.60     | 1.000              |
| 3VPB    | 24              | 3-A                                   | 1     | 0.9913   | 0.58     | 1.000              |
| 3VPB    | 24              | 4-A                                   | 4     | 0.9902   | 0.62     | 1.000              |
| 3VPB    | 24              | 5-A                                   | 2     | 0.9886   | 0.68     | 1.000              |
| 3VPB    | 24              | 1-B                                   | 3     | 0.9896   | 0.65     | 1.000              |
| 3VPB    | 24              | 2-B                                   | 5     | 0.9904   | 0.62     | 1.000              |
| 3VPB    | 24              | 3-B                                   | 1     | 0.9908   | 0.60     | 1.000              |
| 3VPB    | 24              | 4-B                                   | 4     | 0.9897   | 0.64     | 1.000              |
| 3VPB    | 24              | 5-B                                   | 2     | 0.9880   | 0.70     | 1.000              |
| 3VPB    | 24              | 1-C                                   | 3     | 0.9927   | 0.54     | 1.000              |
| 3VPB    | 24              | 2-C                                   | 5     | 0.9938   | 0.49     | 1.000              |
| 3VPB    | 24              | 3-C                                   | 1     | 0.9935   | 0.50     | 1.000              |
| 3VPB    | 24              | 4-C                                   | 4     | 0.9943   | 0.47     | 1.000              |
| 3VPB    | 24              | 5-C                                   | 2     | 0.9917   | 0.57     | 1.000              |
| 3VPB    | 24              | 1-D                                   | 3     | 0.9929   | 0.53     | 1.000              |
| 3VPB    | 24              | 2-D                                   | 5     | 0.9941   | 0.48     | 1.000              |
| 3VPB    | 24              | 3-D                                   | 1     | 0.9938   | 0.49     | 1.000              |
| 3VPB    | 24              | 4-D                                   | 4     | 0.9944   | 0.47     | 1.000              |
| 3VPB    | 24              | 5-D                                   | 2     | 0.9919   | 0.56     | 1.000              |
| 3VPD    | 24              | 1-A                                   | 3     | 0.9939   | 0.54     | 1.000              |
| 3VPD    | 24              | 2-A                                   | 1     | 0.9930   | 0.58     | 1.000              |
| 3VPD    | 24              | 3-A                                   | 2     | 0.9807   | 0.91     | 1.000              |
| 3VPD    | 24              | 4-A                                   | 4     | 0.9829   | 0.86     | 1.000              |
| 3VPD    | 24              | 5-A                                   | 5     | 0.9812   | 0.90     | 1.000              |
| 3VPD    | 24              | 1-B                                   | 3     | 0.9895   | 0.66     | 1.000              |
| 3VPD    | 24              | 2-B                                   | 1     | 0.9893   | 0.67     | 1.000              |
| 3VPD    | 24              | 3-B                                   | 2     | 0.9879   | 0.71     | 1.000              |
| 3VPD    | 24              | 4-B                                   | 4     | 0.9884   | 0.70     | 1.000              |
| 3VPD    | 24              | 5-B                                   | 5     | 0.9867   | 0.73     | 1.000              |
| 5IG8    | 24              | 1-A                                   | 5     | 0.9199   | 3.00     | 1.000              |
| 5IG8    | 24              | 2-A                                   | 4     | 0.9231   | 2.82     | 1.000              |
| 5IG8    | 24              | 3-A                                   | 1     | 0.8829   | 3.95     | 1.000              |
| 5IG8    | 24              | 4-A                                   | 3     | 0.8794   | 3.98     | 1.000              |
| 5IG8    | 24              | 5-A                                   | 2     | 0.8875   | 3.65     | 1.000              |
| 5IG8    | 24              | 1-B                                   | 5     | 0.9922   | 0.53     | 1.000              |
| 5IG8    | 24              | 2-B                                   | 4     | 0.9919   | 0.54     | 1.000              |
| 5IG8    | 24              | 3-B                                   | 1     | 0.9813   | 0.81     | 1.000              |
| 5IG8    | 24              | 4-B                                   | 3     | 0.9788   | 0.86     | 1.000              |
| 5IG8    | 24              | 5-B                                   | 2     | 0.9810   | 0.82     | 1.000              |
| 5IG9    | 24              | 1-A                                   | 2     | 0.9601   | 3.87     | 0.981              |
| 5IG9    | 24              | 2-A                                   | 1     | 0.9601   | 3.87     | 0.981              |
| 5IG9    | 24              | 3-A                                   | 4     | 0.9432   | 3.96     | 0.981              |
| 5IG9    | 24              | 4-A                                   | 5     | 0.9365   | 4.04     | 0.981              |
| 5IG9    | 24              | 5-A                                   | 3     | 0.9469   | 3.96     | 0.981              |
| 5IG9    | 24              | 1-B                                   | 2     | 0.9905   | 0.82     | 0.980              |
| 5IG9    | 24              | 2-B                                   | 1     | 0.9911   | 0.81     | 0.980              |
| 5IG9    | 24              | 3-B                                   | 4     | 0.9713   | 1.26     | 0.980              |
| 5IG9    | 24              | 4-B                                   | 5     | 0.9637   | 1.42     | 0.980              |
| 5IG9    | 24              | 5-B                                   | 3     | 0.9756   | 1.16     | 0.980              |
| 5IG9    | 24              | 1-C                                   | 2     | 0.9692   | 3.15     | 0.984              |
| 5IG9    | 24              | 2-C                                   | 1     | 0.9694   | 3.16     | 0.984              |
| 5IG9    | 24              | 3-C                                   | 4     | 0.9544   | 3.26     | 0.984              |
| 5IG9    | 24              | 4-C                                   | 5     | 0.9498   | 3.32     | 0.984              |
| 5IG9    | 24              | 5-C                                   | 3     | 0.9572   | 3.26     | 0.984              |
| 5IG9    | 24              | 1-D                                   | 2     | 0.9922   | 0.80     | 0.984              |
| 5IG9    | 24              | 2-D                                   | 1     | 0.9919   | 0.81     | 0.984              |
| 5IG9    | 24              | 3-D                                   | 4     | 0.9759   | 1.18     | 0.984              |
| 5IG9    | 24              | 4-D                                   | 5     | 0.9688   | 1.32     | 0.984              |

| PDB ID: | Recycle Number: | Model Number and PDB Reference Chain: | Rank: | TMscore: | RMSD(Å): | Sequence Identity: |
|---------|-----------------|---------------------------------------|-------|----------|----------|--------------------|
| 5IG9    | 24              | 5-D                                   | 3     | 0.9795   | 1.10     | 0.984              |
| 5IG9    | 24              | 1-E                                   | 2     | 0.9651   | 3.61     | 0.984              |
| 5IG9    | 24              | 2-E                                   | 1     | 0.9651   | 3.61     | 0.984              |
| 5IG9    | 24              | 3-E                                   | 4     | 0.9503   | 3.69     | 0.984              |
| 5IG9    | 24              | 4-E                                   | 5     | 0.9458   | 3.74     | 0.984              |
| 5IG9    | 24              | 5-E                                   | 3     | 0.9532   | 3.69     | 0.984              |
| 5IG9    | 24              | 1-F                                   | 2     | 0.9943   | 0.81     | 0.983              |
| 5IG9    | 24              | 2-F                                   | 1     | 0.9944   | 0.81     | 0.983              |
| 5IG9    | 24              | 3-F                                   | 4     | 0.9785   | 1.17     | 0.983              |
| 5IG9    | 24              | 4-F                                   | 5     | 0.9728   | 1.28     | 0.983              |
| 5IG9    | 24              | 5-F                                   | 3     | 0.9816   | 1.10     | 0.983              |
| 5IG9    | 24              | 1-G                                   | 2     | 0.9666   | 3.60     | 0.984              |
| 5IG9    | 24              | 2-G                                   | 1     | 0.9669   | 3.61     | 0.984              |
| 5IG9    | 24              | 3-G                                   | 4     | 0.9524   | 3.69     | 0.984              |
| 5IG9    | 24              | 4-G                                   | 5     | 0.9478   | 3.74     | 0.984              |
| 5IG9    | 24              | 5-G                                   | 3     | 0.9553   | 3.69     | 0.984              |
| 5IG9    | 24              | 1-H                                   | 2     | 0.9890   | 0.63     | 0.981              |
| 5IG9    | 24              | 2-H                                   | 1     | 0.9894   | 0.61     | 0.981              |
| 5IG9    | 24              | 3-H                                   | 4     | 0.9697   | 1.16     | 0.981              |
| 5IG9    | 24              | 4-H                                   | 5     | 0.9624   | 1.34     | 0.981              |
| 5IG9    | 24              | 5-H                                   | 3     | 0.9742   | 1.04     | 0.981              |
| 7DRM    | 24              | 1-A                                   | 4     | 0.9434   | 2.55     | 1.000              |
| 7DRM    | 24              | 2-A                                   | 2     | 0.9477   | 2.48     | 1.000              |
| 7DRM    | 24              | 3-A                                   | 1     | 0.9443   | 2.51     | 1.000              |
| 7DRM    | 24              | 4-A                                   | 3     | 0.9239   | 2.80     | 1.000              |
| 7DRM    | 24              | 5-A                                   | 5     | 0.9091   | 2.87     | 1.000              |
| 7DRM    | 24              | 1-B                                   | 4     | 0.9544   | 1.55     | 1.000              |
| 7DRM    | 24              | 2-B                                   | 2     | 0.9503   | 1.60     | 1.000              |
| 7DRM    | 24              | 3-B                                   | 1     | 0.9563   | 1.52     | 1.000              |
| 7DRM    | 24              | 4-B                                   | 3     | 0.9419   | 1.87     | 1.000              |
| 7DRM    | 24              | 5-B                                   | 5     | 0.9412   | 1.81     | 1.000              |
| 7DRM    | 24              | 1-C                                   | 4     | 0.9419   | 2.55     | 1.000              |
| 7DRM    | 24              | 2-C                                   | 2     | 0.9465   | 2.47     | 1.000              |
| 7DRM    | 24              | 3-C                                   | 1     | 0.9428   | 2.50     | 1.000              |
| 7DRM    | 24              | 4-C                                   | 3     | 0.9225   | 2.77     | 1.000              |
| 7DRM    | 24              | 5-C                                   | 5     | 0.9069   | 2.86     | 1.000              |
| 7DRM    | 24              | 1-D                                   | 4     | 0.9247   | 2.94     | 0.994              |
| 7DRM    | 24              | 2-D                                   | 2     | 0.9223   | 2.94     | 0.994              |
| 7DRM    | 24              | 3-D                                   | 1     | 0.9257   | 2.93     | 0.994              |
| 7DRM    | 24              | 4-D                                   | 3     | 0.9099   | 3.15     | 0.994              |
| 7DRM    | 24              | 5-D                                   | 5     | 0.9075   | 3.11     | 0.994              |
| 7M4S    | 24              | 1-A                                   | 5     | 0.9158   | 2.94     | 1.000              |
| 7M4S    | 24              | 2-A                                   | 1     | 0.9196   | 2.84     | 1.000              |
| 7M4S    | 24              | 3-A                                   | 2     | 0.9189   | 2.89     | 1.000              |
| 7M4S    | 24              | 4-A                                   | 3     | 0.9166   | 2.88     | 1.000              |
| 7M4S    | 24              | 5-A                                   | 4     | 0.9179   | 2.77     | 1.000              |
| 7M4S    | 24              | 1-B                                   | 5     | 0.9209   | 2.66     | 1.000              |
| 7M4S    | 24              | 2-B                                   | 1     | 0.9237   | 2.59     | 1.000              |
| 7M4S    | 24              | 3-B                                   | 2     | 0.9205   | 2.62     | 1.000              |
| 7M4S    | 24              | 4-B                                   | 3     | 0.9166   | 2.67     | 1.000              |
| 7M4S    | 24              | 5-B                                   | 4     | 0.9199   | 2.54     | 1.000              |
| 7M4S    | 24              | 1-C                                   | 5     | 0.9178   | 3.59     | 1.000              |
| 7M4S    | 24              | 2-C                                   | 1     | 0.9211   | 3.54     | 1.000              |
| 7M4S    | 24              | 3-C                                   | 2     | 0.9230   | 3.48     | 1.000              |
| 7M4S    | 24              | 4-C                                   | 3     | 0.9200   | 3.56     | 1.000              |
| 7M4S    | 24              | 5-C                                   | 4     | 0.9183   | 3.57     | 1.000              |
| 7M4S    | 24              | 1-D                                   | 5     | 0.9290   | 4.05     | 1.000              |
| 7M4S    | 24              | 2-D                                   | 1     | 0.9338   | 3.99     | 1.000              |
| 7M4S    | 24              | 3-D                                   | 2     | 0.9336   | 3.97     | 1.000              |
| 7M4S    | 24              | 4-D                                   | 3     | 0.9301   | 4.04     | 1.000              |
| 7M4S    | 24              | 5-D                                   | 4     | 0.9318   | 4.02     | 1.000              |
| 7MGV    | 24              | 1-A                                   | 5     | 0.9245   | 4.14     | 1.000              |
| 7MGV    | 24              | 2-A                                   | 4     | 0.9174   | 4.24     | 1.000              |
| 7MGV    | 24              | 3-A                                   | 1     | 0.9251   | 4.08     | 1.000              |



| PDB ID: | Recycle Number: | Model Number and PDB Reference Chain: | Rank: | TMscore: | RMSD(Å): | Sequence Identity: |
|---------|-----------------|---------------------------------------|-------|----------|----------|--------------------|
| 7MGV    | 24              | 4-A                                   | 3     | 0.9244   | 4.29     | 1.000              |
| 7MGV    | 24              | 5-A                                   | 2     | 0.9278   | 4.04     | 1.000              |
| 7MGV    | 24              | 1-B                                   | 5     | 0.9806   | 0.96     | 1.000              |
| 7MGV    | 24              | 2-B                                   | 4     | 0.9733   | 1.14     | 1.000              |
| 7MGV    | 24              | 3-B                                   | 1     | 0.9819   | 0.93     | 1.000              |
| 7MGV    | 24              | 4-B                                   | 3     | 0.9619   | 1.63     | 1.000              |
| 7MGV    | 24              | 5-B                                   | 2     | 0.9832   | 0.89     | 1.000              |
| 3VPB    | 48              | 1-A                                   | 3     | 0.9918   | 0.57     | 1.000              |
| 3VPB    | 48              | 2-A                                   | 1     | 0.9919   | 0.56     | 1.000              |
| 3VPB    | 48              | 3-A                                   | 2     | 0.9913   | 0.59     | 1.000              |
| 3VPB    | 48              | 4-A                                   | 5     | 0.9898   | 0.63     | 1.000              |
| 3VPB    | 48              | 5-A                                   | 4     | 0.9897   | 0.64     | 1.000              |
| 3VPB    | 48              | 1-B                                   | 3     | 0.9913   | 0.59     | 1.000              |
| 3VPB    | 48              | 2-B                                   | 1     | 0.9913   | 0.59     | 1.000              |
| 3VPB    | 48              | 3-B                                   | 2     | 0.9907   | 0.61     | 1.000              |
| 3VPB    | 48              | 4-B                                   | 5     | 0.9892   | 0.66     | 1.000              |
| 3VPB    | 48              | 5-B                                   | 4     | 0.9891   | 0.66     | 1.000              |
| 3VPB    | 48              | 1-C                                   | 3     | 0.9975   | 0.31     | 1.000              |
| 3VPB    | 48              | 2-C                                   | 1     | 0.9977   | 0.30     | 1.000              |
| 3VPB    | 48              | 3-C                                   | 2     | 0.9935   | 0.51     | 1.000              |
| 3VPB    | 48              | 4-C                                   | 5     | 0.9944   | 0.47     | 1.000              |
| 3VPB    | 48              | 5-C                                   | 4     | 0.9931   | 0.52     | 1.000              |
| 3VPB    | 48              | 1-D                                   | 3     | 0.9976   | 0.30     | 1.000              |
| 3VPB    | 48              | 2-D                                   | 1     | 0.9978   | 0.29     | 1.000              |
| 3VPB    | 48              | 3-D                                   | 2     | 0.9937   | 0.50     | 1.000              |
| 3VPB    | 48              | 4-D                                   | 5     | 0.9945   | 0.46     | 1.000              |
| 3VPB    | 48              | 5-D                                   | 4     | 0.9933   | 0.51     | 1.000              |
| 3VPD    | 48              | 1-A                                   | 2     | 0.9935   | 0.56     | 1.000              |
| 3VPD    | 48              | 2-A                                   | 1     | 0.9926   | 0.59     | 1.000              |
| 3VPD    | 48              | 3-A                                   | 3     | 0.9797   | 0.94     | 1.000              |
| 3VPD    | 48              | 4-A                                   | 4     | 0.9824   | 0.88     | 1.000              |
| 3VPD    | 48              | 5-A                                   | 5     | 0.9812   | 0.90     | 1.000              |
| 3VPD    | 48              | 1-B                                   | 2     | 0.9877   | 0.71     | 1.000              |
| 3VPD    | 48              | 2-B                                   | 1     | 0.9876   | 0.72     | 1.000              |
| 3VPD    | 48              | 3-B                                   | 3     | 0.9873   | 0.73     | 1.000              |
| 3VPD    | 48              | 4-B                                   | 4     | 0.9880   | 0.71     | 1.000              |
| 3VPD    | 48              | 5-B                                   | 5     | 0.9863   | 0.74     | 1.000              |
| 5IG8    | 48              | 1-A                                   | 5     | 0.9133   | 3.13     | 1.000              |
| 5IG8    | 48              | 2-A                                   | 2     | 0.9162   | 3.03     | 1.000              |
| 5IG8    | 48              | 3-A                                   | 1     | 0.8828   | 3.99     | 1.000              |
| 5IG8    | 48              | 4-A                                   | 4     | 0.8814   | 3.96     | 1.000              |
| 5IG8    | 48              | 5-A                                   | 3     | 0.8853   | 3.80     | 1.000              |
| 5IG8    | 48              | 1-B                                   | 5     | 0.9929   | 0.50     | 1.000              |
| 5IG8    | 48              | 2-B                                   | 2     | 0.9921   | 0.53     | 1.000              |
| 5IG8    | 48              | 3-B                                   | 1     | 0.9818   | 0.80     | 1.000              |
| 5IG8    | 48              | 4-B                                   | 4     | 0.9788   | 0.86     | 1.000              |
| 5IG8    | 48              | 5-B                                   | 3     | 0.9809   | 0.82     | 1.000              |
| 5IG9    | 48              | 1-A                                   | 2     | 0.9618   | 3.80     | 0.981              |
| 5IG9    | 48              | 2-A                                   | 1     | 0.9603   | 3.81     | 0.981              |
| 5IG9    | 48              | 3-A                                   | 3     | 0.9458   | 3.93     | 0.981              |
| 5IG9    | 48              | 4-A                                   | 5     | 0.9383   | 4.02     | 0.981              |
| 5IG9    | 48              | 5-A                                   | 4     | 0.9471   | 3.97     | 0.981              |
| 5IG9    | 48              | 1-B                                   | 2     | 0.9900   | 0.84     | 0.980              |
| 5IG9    | 48              | 2-B                                   | 1     | 0.9896   | 0.85     | 0.980              |
| 5IG9    | 48              | 3-B                                   | 3     | 0.9741   | 1.19     | 0.980              |
| 5IG9    | 48              | 4-B                                   | 5     | 0.9645   | 1.40     | 0.980              |
| 5IG9    | 48              | 5-B                                   | 4     | 0.9752   | 1.16     | 0.980              |
| 5IG9    | 48              | 1-C                                   | 2     | 0.9709   | 3.11     | 0.984              |
| 5IG9    | 48              | 2-C                                   | 1     | 0.9698   | 3.11     | 0.984              |
| 5IG9    | 48              | 3-C                                   | 3     | 0.9562   | 3.24     | 0.984              |
| 5IG9    | 48              | 4-C                                   | 5     | 0.9509   | 3.31     | 0.984              |
| 5IG9    | 48              | 5-C                                   | 4     | 0.9571   | 3.28     | 0.984              |
| 5IG9    | 48              | 1-D                                   | 2     | 0.9914   | 0.83     | 0.984              |
| 5IG9    | 48              | 2-D                                   | 1     | 0.9901   | 0.87     | 0.984              |

| PDB ID: | Recycle Number: | Model Number and PDB Reference Chain: | Rank: | TMscore: | RMSD(Å): | Sequence Identity: |
|---------|-----------------|---------------------------------------|-------|----------|----------|--------------------|
| 5IG9    | 48              | 3-D                                   | 3     | 0.9781   | 1.13     | 0.984              |
| 5IG9    | 48              | 4-D                                   | 5     | 0.9698   | 1.30     | 0.984              |
| 5IG9    | 48              | 5-D                                   | 4     | 0.9796   | 1.08     | 0.984              |
| 5IG9    | 48              | 1-E                                   | 2     | 0.9666   | 3.55     | 0.984              |
| 5IG9    | 48              | 2-E                                   | 1     | 0.9653   | 3.55     | 0.984              |
| 5IG9    | 48              | 3-E                                   | 3     | 0.9518   | 3.67     | 0.984              |
| 5IG9    | 48              | 4-E                                   | 5     | 0.9470   | 3.73     | 0.984              |
| 5IG9    | 48              | 5-E                                   | 4     | 0.9530   | 3.71     | 0.984              |
| 5IG9    | 48              | 1-F                                   | 2     | 0.9936   | 0.83     | 0.983              |
| 5IG9    | 48              | 2-F                                   | 1     | 0.9926   | 0.86     | 0.983              |
| 5IG9    | 48              | 3-F                                   | 3     | 0.9803   | 1.13     | 0.983              |
| 5IG9    | 48              | 4-F                                   | 5     | 0.9734   | 1.27     | 0.983              |
| 5IG9    | 48              | 5-F                                   | 4     | 0.9816   | 1.09     | 0.983              |
| 5IG9    | 48              | 1-G                                   | 2     | 0.9682   | 3.55     | 0.984              |
| 5IG9    | 48              | 2-G                                   | 1     | 0.9672   | 3.55     | 0.984              |
| 5IG9    | 48              | 3-G                                   | 3     | 0.9542   | 3.66     | 0.984              |
| 5IG9    | 48              | 4-G                                   | 5     | 0.9488   | 3.73     | 0.984              |
| 5IG9    | 48              | 5-G                                   | 4     | 0.9552   | 3.70     | 0.984              |
| 5IG9    | 48              | 1-H                                   | 2     | 0.9880   | 0.67     | 0.981              |
| 5IG9    | 48              | 2-H                                   | 1     | 0.9876   | 0.68     | 0.981              |
| 5IG9    | 48              | 3-H                                   | 3     | 0.9722   | 1.09     | 0.981              |
| 5IG9    | 48              | 4-H                                   | 5     | 0.9631   | 1.32     | 0.981              |
| 5IG9    | 48              | 5-H                                   | 4     | 0.9743   | 1.03     | 0.981              |
| 7DRM    | 48              | 1-A                                   | 2     | 0.9774   | 2.09     | 1.000              |
| 7DRM    | 48              | 2-A                                   | 1     | 0.9773   | 2.11     | 1.000              |
| 7DRM    | 48              | 3-A                                   | 3     | 0.9449   | 2.51     | 1.000              |
| 7DRM    | 48              | 4-A                                   | 4     | 0.9288   | 2.63     | 1.000              |
| 7DRM    | 48              | 5-A                                   | 5     | 0.9356   | 2.51     | 1.000              |
| 7DRM    | 48              | 1-B                                   | 2     | 0.9589   | 1.47     | 1.000              |
| 7DRM    | 48              | 2-B                                   | 1     | 0.9582   | 1.48     | 1.000              |
| 7DRM    | 48              | 3-B                                   | 3     | 0.9545   | 1.58     | 1.000              |
| 7DRM    | 48              | 4-B                                   | 4     | 0.9466   | 1.62     | 1.000              |
| 7DRM    | 48              | 5-B                                   | 5     | 0.9558   | 1.46     | 1.000              |
| 7DRM    | 48              | 1-C                                   | 2     | 0.9759   | 2.09     | 1.000              |
| 7DRM    | 48              | 2-C                                   | 1     | 0.9760   | 2.11     | 1.000              |
| 7DRM    | 48              | 3-C                                   | 3     | 0.9433   | 2.49     | 1.000              |
| 7DRM    | 48              | 4-C                                   | 4     | 0.9262   | 2.64     | 1.000              |
| 7DRM    | 48              | 5-C                                   | 5     | 0.9325   | 2.53     | 1.000              |
| 7DRM    | 48              | 1-D                                   | 2     | 0.9329   | 2.84     | 0.994              |
| 7DRM    | 48              | 2-D                                   | 1     | 0.9322   | 2.84     | 0.994              |
| 7DRM    | 48              | 3-D                                   | 3     | 0.9234   | 2.98     | 0.994              |
| 7DRM    | 48              | 4-D                                   | 4     | 0.9138   | 3.02     | 0.994              |
| 7DRM    | 48              | 5-D                                   | 5     | 0.9257   | 2.85     | 0.994              |
| 7M4S    | 48              | 1-A                                   | 3     | 0.9340   | 2.68     | 1.000              |
| 7M4S    | 48              | 2-A                                   | 1     | 0.9307   | 2.70     | 1.000              |
| 7M4S    | 48              | 3-A                                   | 2     | 0.9209   | 2.84     | 1.000              |
| 7M4S    | 48              | 4-A                                   | 4     | 0.9204   | 2.85     | 1.000              |
| 7M4S    | 48              | 5-A                                   | 5     | 0.9192   | 2.71     | 1.000              |
| 7M4S    | 48              | 1-B                                   | 3     | 0.9407   | 2.41     | 1.000              |
| 7M4S    | 48              | 2-B                                   | 1     | 0.9373   | 2.43     | 1.000              |
| 7M4S    | 48              | 3-B                                   | 2     | 0.9221   | 2.58     | 1.000              |
| 7M4S    | 48              | 4-B                                   | 4     | 0.9198   | 2.65     | 1.000              |
| 7M4S    | 48              | 5-B                                   | 5     | 0.9209   | 2.52     | 1.000              |
| 7M4S    | 48              | 1-C                                   | 3     | 0.9265   | 3.54     | 1.000              |
| 7M4S    | 48              | 2-C                                   | 1     | 0.9260   | 3.51     | 1.000              |
| 7M4S    | 48              | 3-C                                   | 2     | 0.9241   | 3.47     | 1.000              |
| 7M4S    | 48              | 4-C                                   | 4     | 0.9219   | 3.56     | 1.000              |
| 7M4S    | 48              | 5-C                                   | 5     | 0.9180   | 3.59     | 1.000              |
| 7M4S    | 48              | 1-D                                   | 3     | 0.9415   | 3.97     | 1.000              |
| 7M4S    | 48              | 2-D                                   | 1     | 0.9409   | 3.93     | 1.000              |
| 7M4S    | 48              | 3-D                                   | 2     | 0.9355   | 3.94     | 1.000              |
| 7M4S    | 48              | 4-D                                   | 4     | 0.9340   | 4.02     | 1.000              |
| 7M4S    | 48              | 5-D                                   | 5     | 0.9323   | 4.02     | 1.000              |
| 7MGV    | 48              | 1-A                                   | 2     | 0.9354   | 4.01     | 1.000              |

| PDB ID: | Recycle Number: | Model Number and PDB Reference Chain: | Rank: | TMscore: | RMSD(Å): | Sequence Identity: |
|---------|-----------------|---------------------------------------|-------|----------|----------|--------------------|
| 7MGV    | 48              | 2-A                                   | 1     | 0.9331   | 4.03     | 1.000              |
| 7MGV    | 48              | 3-A                                   | 3     | 0.9253   | 4.06     | 1.000              |
| 7MGV    | 48              | 4-A                                   | 5     | 0.9238   | 4.28     | 1.000              |
| 7MGV    | 48              | 5-A                                   | 4     | 0.9288   | 3.98     | 1.000              |
| 7MGV    | 48              | 1-B                                   | 2     | 0.9963   | 0.42     | 1.000              |
| 7MGV    | 48              | 2-B                                   | 1     | 0.9946   | 0.51     | 1.000              |
| 7MGV    | 48              | 3-B                                   | 3     | 0.9816   | 0.93     | 1.000              |
| 7MGV    | 48              | 4-B                                   | 5     | 0.9607   | 1.64     | 1.000              |
| 7MGV    | 48              | 5-B                                   | 4     | 0.9826   | 0.90     | 1.000              |

**Table S4.** Dimer ATP Grasp Ligase RiPP biosynthetic enzyme US-align results without template or AMBER. Enzymes with multiple available reference subunits are denoted with their corresponding chain letters.

| PDB ID: | Recycle Number: | Model Number and PDB Reference Chain: | Rank: | TMscore: | RMSD (Å): | Sequence Identity: |
|---------|-----------------|---------------------------------------|-------|----------|-----------|--------------------|
| 3VPB    | 3               | 1-A/B                                 | 5     | 0.9925   | 0.73      | 1.000              |
| 3VPB    | 3               | 2-A/B                                 | 4     | 0.9917   | 0.77      | 1.000              |
| 3VPB    | 3               | 3-A/B                                 | 1     | 0.9927   | 0.72      | 1.000              |
| 3VPB    | 3               | 4-A/B                                 | 3     | 0.9910   | 0.80      | 1.000              |
| 3VPB    | 3               | 5-A/B                                 | 2     | 0.9916   | 0.78      | 1.000              |
| 3VPB    | 3               | 1-C/D                                 | 5     | 0.9958   | 0.54      | 1.000              |
| 3VPB    | 3               | 2-C/D                                 | 4     | 0.9957   | 0.55      | 1.000              |
| 3VPB    | 3               | 3-C/D                                 | 1     | 0.9960   | 0.53      | 1.000              |
| 3VPB    | 3               | 4-C/D                                 | 3     | 0.9949   | 0.60      | 1.000              |
| 3VPB    | 3               | 5-C/D                                 | 2     | 0.9955   | 0.57      | 1.000              |
| 3VPD    | 3               | 1-A/B                                 | 3     | 0.9897   | 0.87      | 1.000              |
| 3VPD    | 3               | 2-A/B                                 | 1     | 0.9907   | 0.83      | 1.000              |
| 3VPD    | 3               | 3-A/B                                 | 2     | 0.9916   | 0.79      | 1.000              |
| 3VPD    | 3               | 4-A/B                                 | 4     | 0.9909   | 0.82      | 1.000              |
| 3VPD    | 3               | 5-A/B                                 | 5     | 0.9907   | 0.83      | 1.000              |
| 5IG9    | 3               | 1-A/B                                 | 3     | 0.9716   | 3.39      | 0.981              |
| 5IG9    | 3               | 2-A/B                                 | 1     | 0.9697   | 3.55      | 0.981              |
| 5IG9    | 3               | 3-A/B                                 | 2     | 0.9693   | 3.44      | 0.981              |
| 5IG9    | 3               | 4-A/B                                 | 4     | 0.9706   | 3.44      | 0.981              |
| 5IG9    | 3               | 5-A/B                                 | 5     | 0.9697   | 3.52      | 0.981              |
| 5IG9    | 3               | 1-C/D                                 | 3     | 0.9773   | 2.43      | 0.984              |
| 5IG9    | 3               | 2-C/D                                 | 1     | 0.9759   | 2.58      | 0.984              |
| 5IG9    | 3               | 3-C/D                                 | 2     | 0.9755   | 2.47      | 0.984              |
| 5IG9    | 3               | 4-C/D                                 | 4     | 0.9765   | 2.47      | 0.984              |
| 5IG9    | 3               | 5-C/D                                 | 5     | 0.9757   | 2.51      | 0.984              |
| 5IG9    | 3               | 1-E/H                                 | 3     | 0.9745   | 2.69      | 0.982              |
| 5IG9    | 3               | 2-E/H                                 | 1     | 0.9732   | 2.85      | 0.982              |
| 5IG9    | 3               | 3-E/H                                 | 2     | 0.9728   | 2.73      | 0.982              |
| 5IG9    | 3               | 4-E/H                                 | 4     | 0.9737   | 2.74      | 0.982              |
| 5IG9    | 3               | 5-E/H                                 | 5     | 0.9725   | 2.81      | 0.982              |
| 5IG9    | 3               | 1-F/G                                 | 3     | 0.9767   | 2.72      | 0.984              |
| 5IG9    | 3               | 2-F/G                                 | 1     | 0.9758   | 2.88      | 0.984              |
| 5IG9    | 3               | 3-F/G                                 | 2     | 0.9751   | 2.76      | 0.984              |
| 5IG9    | 3               | 4-F/G                                 | 4     | 0.9760   | 2.77      | 0.984              |
| 5IG9    | 3               | 5-F/G                                 | 5     | 0.9751   | 2.84      | 0.984              |
| 7DRM    | 3               | 1-A/B                                 | 5     | 0.9748   | 1.87      | 1.000              |
| 7DRM    | 3               | 2-A/B                                 | 4     | 0.9776   | 1.46      | 1.000              |
| 7DRM    | 3               | 3-A/B                                 | 2     | 0.9746   | 1.91      | 1.000              |
| 7DRM    | 3               | 4-A/B                                 | 3     | 0.9786   | 1.34      | 1.000              |
| 7DRM    | 3               | 5-A/B                                 | 1     | 0.9824   | 1.19      | 1.000              |
| 7DRM    | 3               | 1-C/D                                 | 5     | 0.9649   | 2.46      | 0.997              |
| 7DRM    | 3               | 2-C/D                                 | 4     | 0.9682   | 1.89      | 0.997              |
| 7DRM    | 3               | 3-C/D                                 | 2     | 0.9639   | 2.52      | 0.997              |
| 7DRM    | 3               | 4-C/D                                 | 3     | 0.9688   | 1.84      | 0.997              |
| 7DRM    | 3               | 5-C/D                                 | 1     | 0.9745   | 1.56      | 0.997              |
| 7M4S    | 3               | 1-A/D                                 | 4     | 0.9365   | 3.59      | 1.000              |

| PDB ID: | Recycle Number: | Model Number and PDB Reference Chain: | Rank: | TMscore: | RMSD (Å): | Sequence Identity: |
|---------|-----------------|---------------------------------------|-------|----------|-----------|--------------------|
| 7M4S    | 3               | 2-A/D                                 | 2     | 0.9428   | 3.41      | 1.000              |
| 7M4S    | 3               | 3-A/D                                 | 5     | 0.9447   | 3.40      | 1.000              |
| 7M4S    | 3               | 4-A/D                                 | 3     | 0.9408   | 3.54      | 1.000              |
| 7M4S    | 3               | 5-A/D                                 | 1     | 0.9430   | 3.50      | 1.000              |
| 7M4S    | 3               | 1-B/C                                 | 4     | 0.9336   | 3.39      | 1.000              |
| 7M4S    | 3               | 2-B/C                                 | 2     | 0.9391   | 3.19      | 1.000              |
| 7M4S    | 3               | 3-B/C                                 | 5     | 0.9419   | 3.18      | 1.000              |
| 7M4S    | 3               | 4-B/C                                 | 3     | 0.9386   | 3.32      | 1.000              |
| 7M4S    | 3               | 5-B/C                                 | 1     | 0.9405   | 3.30      | 1.000              |
| 7MGV    | 3               | 1-A/B                                 | 1     | 0.9617   | 3.01      | 1.000              |
| 7MGV    | 3               | 2-A/B                                 | 2     | 0.9624   | 3.03      | 1.000              |
| 7MGV    | 3               | 3-A/B                                 | 3     | 0.9569   | 3.09      | 1.000              |
| 7MGV    | 3               | 4-A/B                                 | 4     | 0.9592   | 3.08      | 1.000              |
| 7MGV    | 3               | 5-A/B                                 | 5     | 0.9594   | 3.07      | 1.000              |
| 3VPB    | 12              | 1-A/B                                 | 4     | 0.9914   | 0.78      | 1.000              |
| 3VPB    | 12              | 2-A/B                                 | 5     | 0.9912   | 0.79      | 1.000              |
| 3VPB    | 12              | 3-A/B                                 | 3     | 0.9915   | 0.78      | 1.000              |
| 3VPB    | 12              | 4-A/B                                 | 2     | 0.9903   | 0.83      | 1.000              |
| 3VPB    | 12              | 5-A/B                                 | 1     | 0.9910   | 0.80      | 1.000              |
| 3VPB    | 12              | 1-C/D                                 | 4     | 0.9951   | 0.59      | 1.000              |
| 3VPB    | 12              | 2-C/D                                 | 5     | 0.9953   | 0.58      | 1.000              |
| 3VPB    | 12              | 3-C/D                                 | 3     | 0.9952   | 0.58      | 1.000              |
| 3VPB    | 12              | 4-C/D                                 | 2     | 0.9945   | 0.62      | 1.000              |
| 3VPB    | 12              | 5-C/D                                 | 1     | 0.9950   | 0.59      | 1.000              |
| 3VPD    | 12              | 1-A/B                                 | 5     | 0.9899   | 0.87      | 1.000              |
| 3VPD    | 12              | 2-A/B                                 | 4     | 0.9901   | 0.86      | 1.000              |
| 3VPD    | 12              | 3-A/B                                 | 1     | 0.9909   | 0.82      | 1.000              |
| 3VPD    | 12              | 4-A/B                                 | 2     | 0.9905   | 0.84      | 1.000              |
| 3VPD    | 12              | 5-A/B                                 | 3     | 0.9897   | 0.88      | 1.000              |
| 5IG9    | 12              | 1-A/B                                 | 2     | 0.9710   | 3.39      | 0.981              |
| 5IG9    | 12              | 2-A/B                                 | 1     | 0.9698   | 3.42      | 0.981              |
| 5IG9    | 12              | 3-A/B                                 | 5     | 0.9688   | 3.44      | 0.981              |
| 5IG9    | 12              | 4-A/B                                 | 4     | 0.9692   | 3.44      | 0.981              |
| 5IG9    | 12              | 5-A/B                                 | 3     | 0.9689   | 3.45      | 0.981              |
| 5IG9    | 12              | 1-C/D                                 | 2     | 0.9768   | 2.43      | 0.984              |
| 5IG9    | 12              | 2-C/D                                 | 1     | 0.9759   | 2.47      | 0.984              |
| 5IG9    | 12              | 3-C/D                                 | 5     | 0.9749   | 2.48      | 0.984              |
| 5IG9    | 12              | 4-C/D                                 | 4     | 0.9751   | 2.49      | 0.984              |
| 5IG9    | 12              | 5-C/D                                 | 3     | 0.9747   | 2.48      | 0.984              |
| 5IG9    | 12              | 1-E/H                                 | 2     | 0.9737   | 2.69      | 0.982              |
| 5IG9    | 12              | 2-E/H                                 | 1     | 0.9733   | 2.71      | 0.982              |
| 5IG9    | 12              | 3-E/H                                 | 5     | 0.9720   | 2.73      | 0.982              |
| 5IG9    | 12              | 4-E/H                                 | 4     | 0.9723   | 2.74      | 0.982              |
| 5IG9    | 12              | 5-E/H                                 | 3     | 0.9717   | 2.75      | 0.982              |
| 5IG9    | 12              | 1-F/G                                 | 2     | 0.9762   | 2.72      | 0.984              |
| 5IG9    | 12              | 2-F/G                                 | 1     | 0.9758   | 2.74      | 0.984              |
| 5IG9    | 12              | 3-F/G                                 | 5     | 0.9743   | 2.76      | 0.984              |
| 5IG9    | 12              | 4-F/G                                 | 4     | 0.9746   | 2.78      | 0.984              |
| 5IG9    | 12              | 5-F/G                                 | 3     | 0.9742   | 2.78      | 0.984              |
| 7DRM    | 12              | 1-A/B                                 | 5     | 0.9777   | 1.38      | 1.000              |
| 7DRM    | 12              | 2-A/B                                 | 2     | 0.9807   | 1.27      | 1.000              |
| 7DRM    | 12              | 3-A/B                                 | 3     | 0.9711   | 2.00      | 1.000              |
| 7DRM    | 12              | 4-A/B                                 | 4     | 0.9780   | 1.35      | 1.000              |
| 7DRM    | 12              | 5-A/B                                 | 1     | 0.9740   | 1.59      | 1.000              |
| 7DRM    | 12              | 1-C/D                                 | 5     | 0.9709   | 1.64      | 0.997              |
| 7DRM    | 12              | 2-C/D                                 | 2     | 0.9706   | 1.80      | 0.997              |
| 7DRM    | 12              | 3-C/D                                 | 3     | 0.9612   | 2.57      | 0.997              |
| 7DRM    | 12              | 4-C/D                                 | 4     | 0.9686   | 1.81      | 0.997              |
| 7DRM    | 12              | 5-C/D                                 | 1     | 0.9667   | 1.85      | 0.997              |
| 7M4S    | 12              | 1-A/D                                 | 2     | 0.9368   | 3.55      | 1.000              |
| 7M4S    | 12              | 2-A/D                                 | 1     | 0.9445   | 3.37      | 1.000              |
| 7M4S    | 12              | 3-A/D                                 | 4     | 0.9472   | 3.37      | 1.000              |
| 7M4S    | 12              | 4-A/D                                 | 5     | 0.9438   | 3.47      | 1.000              |
| 7M4S    | 12              | 5-A/D                                 | 4     | 0.9443   | 3.47      | 1.000              |

| PDB ID: | Recycle Number: | Model Number and PDB Reference Chain: | Rank: | TMscore: | RMSD (Å): | Sequence Identity: |
|---------|-----------------|---------------------------------------|-------|----------|-----------|--------------------|
| 7M4S    | 12              | 1-B/C                                 | 2     | 0.9324   | 3.38      | 1.000              |
| 7M4S    | 12              | 2-B/C                                 | 1     | 0.9391   | 3.19      | 1.000              |
| 7M4S    | 12              | 3-B/C                                 | 4     | 0.9424   | 3.18      | 1.000              |
| 7M4S    | 12              | 4-B/C                                 | 5     | 0.9399   | 3.27      | 1.000              |
| 7M4S    | 12              | 5-B/C                                 | 4     | 0.9399   | 3.28      | 1.000              |
| 7MGV    | 12              | 1-A/B                                 | 5     | 0.9588   | 3.02      | 1.000              |
| 7MGV    | 12              | 2-A/B                                 | 1     | 0.9584   | 3.04      | 1.000              |
| 7MGV    | 12              | 3-A/B                                 | 4     | 0.9538   | 3.11      | 1.000              |
| 7MGV    | 12              | 4-A/B                                 | 3     | 0.9566   | 3.10      | 1.000              |
| 7MGV    | 12              | 5-A/B                                 | 2     | 0.9582   | 3.07      | 1.000              |
| 3VPB    | 24              | 1-A/B                                 | 4     | 0.9921   | 0.75      | 1.000              |
| 3VPB    | 24              | 2-A/B                                 | 1     | 0.9919   | 0.76      | 1.000              |
| 3VPB    | 24              | 3-A/B                                 | 2     | 0.9917   | 0.77      | 1.000              |
| 3VPB    | 24              | 4-A/B                                 | 3     | 0.9924   | 0.73      | 1.000              |
| 3VPB    | 24              | 5-A/B                                 | 5     | 0.9925   | 0.73      | 1.000              |
| 3VPB    | 24              | 1-C/D                                 | 4     | 0.9944   | 0.63      | 1.000              |
| 3VPB    | 24              | 2-C/D                                 | 1     | 0.9958   | 0.54      | 1.000              |
| 3VPB    | 24              | 3-C/D                                 | 2     | 0.9938   | 0.66      | 1.000              |
| 3VPB    | 24              | 4-C/D                                 | 3     | 0.9953   | 0.57      | 1.000              |
| 3VPB    | 24              | 5-C/D                                 | 5     | 0.9947   | 0.61      | 1.000              |
| 3VPD    | 24              | 1-A/B                                 | 5     | 0.9944   | 0.65      | 1.000              |
| 3VPD    | 24              | 2-A/B                                 | 3     | 0.9947   | 0.63      | 1.000              |
| 3VPD    | 24              | 3-A/B                                 | 2     | 0.9947   | 0.63      | 1.000              |
| 3VPD    | 24              | 4-A/B                                 | 1     | 0.9946   | 0.64      | 1.000              |
| 3VPD    | 24              | 5-A/B                                 | 4     | 0.9946   | 0.64      | 1.000              |
| 5IG9    | 24              | 1-A/B                                 | 4     | 0.9784   | 3.33      | 0.981              |
| 5IG9    | 24              | 2-A/B                                 | 2     | 0.9782   | 3.35      | 0.981              |
| 5IG9    | 24              | 3-A/B                                 | 5     | 0.9782   | 3.35      | 0.981              |
| 5IG9    | 24              | 4-A/B                                 | 3     | 0.9784   | 3.40      | 0.981              |
| 5IG9    | 24              | 5-A/B                                 | 1     | 0.9780   | 3.36      | 0.981              |
| 5IG9    | 24              | 1-C/D                                 | 4     | 0.9839   | 2.35      | 0.984              |
| 5IG9    | 24              | 2-C/D                                 | 2     | 0.9838   | 2.38      | 0.984              |
| 5IG9    | 24              | 3-C/D                                 | 5     | 0.9838   | 2.37      | 0.984              |
| 5IG9    | 24              | 4-C/D                                 | 3     | 0.9840   | 2.42      | 0.984              |
| 5IG9    | 24              | 5-C/D                                 | 1     | 0.9836   | 2.38      | 0.984              |
| 5IG9    | 24              | 1-E/H                                 | 4     | 0.9814   | 2.61      | 0.982              |
| 5IG9    | 24              | 2-E/H                                 | 2     | 0.9813   | 2.64      | 0.982              |
| 5IG9    | 24              | 3-E/H                                 | 5     | 0.9813   | 2.64      | 0.982              |
| 5IG9    | 24              | 4-E/H                                 | 3     | 0.9815   | 2.69      | 0.982              |
| 5IG9    | 24              | 5-E/H                                 | 1     | 0.9811   | 2.65      | 0.982              |
| 5IG9    | 24              | 1-F/G                                 | 4     | 0.9830   | 2.66      | 0.984              |
| 5IG9    | 24              | 2-F/G                                 | 2     | 0.9829   | 2.69      | 0.984              |
| 5IG9    | 24              | 3-F/G                                 | 5     | 0.9829   | 2.68      | 0.984              |
| 5IG9    | 24              | 4-F/G                                 | 3     | 0.9830   | 2.74      | 0.984              |
| 5IG9    | 24              | 5-F/G                                 | 1     | 0.9827   | 2.70      | 0.984              |
| 7DRM    | 24              | 1-A/B                                 | 4     | 0.9758   | 1.44      | 1.000              |
| 7DRM    | 24              | 2-A/B                                 | 3     | 0.9755   | 1.43      | 1.000              |
| 7DRM    | 24              | 3-A/B                                 | 1     | 0.9745   | 1.50      | 1.000              |
| 7DRM    | 24              | 4-A/B                                 | 5     | 0.9779   | 1.36      | 1.000              |
| 7DRM    | 24              | 5-A/B                                 | 2     | 0.9748   | 1.48      | 1.000              |
| 7DRM    | 24              | 1-C/D                                 | 4     | 0.9696   | 1.67      | 0.997              |
| 7DRM    | 24              | 2-C/D                                 | 3     | 0.9671   | 1.85      | 0.997              |
| 7DRM    | 24              | 3-C/D                                 | 1     | 0.9660   | 1.87      | 0.997              |
| 7DRM    | 24              | 4-C/D                                 | 5     | 0.9693   | 1.77      | 0.997              |
| 7DRM    | 24              | 5-C/D                                 | 2     | 0.9688   | 1.70      | 0.997              |
| 7M4S    | 24              | 1-A/D                                 | 1     | 0.9447   | 3.43      | 1.000              |
| 7M4S    | 24              | 2-A/D                                 | 5     | 0.9441   | 3.32      | 1.000              |
| 7M4S    | 24              | 3-A/D                                 | 4     | 0.9499   | 3.21      | 1.000              |
| 7M4S    | 24              | 4-A/D                                 | 2     | 0.9467   | 3.45      | 1.000              |
| 7M4S    | 24              | 5-A/D                                 | 3     | 0.9452   | 3.33      | 1.000              |
| 7M4S    | 24              | 1-B/C                                 | 1     | 0.9401   | 3.23      | 1.000              |
| 7M4S    | 24              | 2-B/C                                 | 5     | 0.9422   | 3.02      | 1.000              |
| 7M4S    | 24              | 3-B/C                                 | 4     | 0.9459   | 2.99      | 1.000              |
| 7M4S    | 24              | 4-B/C                                 | 2     | 0.9430   | 3.23      | 1.000              |

| PDB ID: | Recycle Number: | Model Number and PDB Reference Chain: | Rank: | TMscore: | RMSD (Å): | Sequence Identity: |
|---------|-----------------|---------------------------------------|-------|----------|-----------|--------------------|
| 7M4S    | 24              | 5-B/C                                 | 3     | 0.9413   | 3.07      | 1.000              |
| 7MGV    | 24              | 1-A/B                                 | 5     | 0.9611   | 2.95      | 1.000              |
| 7MGV    | 24              | 2-A/B                                 | 1     | 0.9592   | 3.04      | 1.000              |
| 7MGV    | 24              | 3-A/B                                 | 4     | 0.9581   | 3.02      | 1.000              |
| 7MGV    | 24              | 4-A/B                                 | 3     | 0.9593   | 3.09      | 1.000              |
| 7MGV    | 24              | 5-A/B                                 | 2     | 0.9602   | 3.03      | 1.000              |
| 3VPB    | 48              | 1-A/B                                 | 3     | 0.9912   | 0.79      | 1.000              |
| 3VPB    | 48              | 2-A/B                                 | 4     | 0.9912   | 0.79      | 1.000              |
| 3VPB    | 48              | 3-A/B                                 | 5     | 0.9911   | 0.80      | 1.000              |
| 3VPB    | 48              | 4-A/B                                 | 2     | 0.9905   | 0.82      | 1.000              |
| 3VPB    | 48              | 5-A/B                                 | 1     | 0.9912   | 0.79      | 1.000              |
| 3VPB    | 48              | 1-C/D                                 | 3     | 0.9951   | 0.59      | 1.000              |
| 3VPB    | 48              | 2-C/D                                 | 4     | 0.9954   | 0.57      | 1.000              |
| 3VPB    | 48              | 3-C/D                                 | 5     | 0.9945   | 0.62      | 1.000              |
| 3VPB    | 48              | 4-C/D                                 | 2     | 0.9948   | 0.61      | 1.000              |
| 3VPB    | 48              | 5-C/D                                 | 1     | 0.9952   | 0.58      | 1.000              |
| 3VPD    | 48              | 1-A/B                                 | 5     | 0.9898   | 0.87      | 1.000              |
| 3VPD    | 48              | 2-A/B                                 | 4     | 0.9903   | 0.85      | 1.000              |
| 3VPD    | 48              | 3-A/B                                 | 1     | 0.9912   | 0.80      | 1.000              |
| 3VPD    | 48              | 4-A/B                                 | 3     | 0.9906   | 0.83      | 1.000              |
| 3VPD    | 48              | 5-A/B                                 | 2     | 0.9897   | 0.87      | 1.000              |
| 5IG9    | 48              | 1-A/B                                 | 1     | 0.9687   | 3.41      | 0.981              |
| 5IG9    | 48              | 2-A/B                                 | 2     | 0.9702   | 3.41      | 0.981              |
| 5IG9    | 48              | 3-A/B                                 | 4     | 0.9692   | 3.45      | 0.981              |
| 5IG9    | 48              | 4-A/B                                 | 5     | 0.9679   | 3.45      | 0.981              |
| 5IG9    | 48              | 5-A/B                                 | 3     | 0.9667   | 3.48      | 0.981              |
| 5IG9    | 48              | 1-C/D                                 | 1     | 0.9746   | 2.47      | 0.984              |
| 5IG9    | 48              | 2-C/D                                 | 2     | 0.9761   | 2.46      | 0.984              |
| 5IG9    | 48              | 3-C/D                                 | 4     | 0.9752   | 2.49      | 0.984              |
| 5IG9    | 48              | 4-C/D                                 | 5     | 0.9739   | 2.51      | 0.984              |
| 5IG9    | 48              | 5-C/D                                 | 3     | 0.9725   | 2.52      | 0.984              |
| 5IG9    | 48              | 1-E/H                                 | 1     | 0.9719   | 2.72      | 0.982              |
| 5IG9    | 48              | 2-E/H                                 | 2     | 0.9734   | 2.71      | 0.982              |
| 5IG9    | 48              | 3-E/H                                 | 4     | 0.9722   | 2.75      | 0.982              |
| 5IG9    | 48              | 4-E/H                                 | 5     | 0.9713   | 2.76      | 0.982              |
| 5IG9    | 48              | 5-E/H                                 | 3     | 0.9695   | 2.78      | 0.982              |
| 5IG9    | 48              | 1-F/G                                 | 1     | 0.9742   | 2.76      | 0.984              |
| 5IG9    | 48              | 2-F/G                                 | 2     | 0.9757   | 2.74      | 0.984              |
| 5IG9    | 48              | 3-F/G                                 | 4     | 0.9747   | 2.78      | 0.984              |
| 5IG9    | 48              | 4-F/G                                 | 5     | 0.9735   | 2.80      | 0.984              |
| 5IG9    | 48              | 5-F/G                                 | 3     | 0.9721   | 2.81      | 0.984              |
| 7DRM    | 48              | 1-A/B                                 | 5     | 0.9776   | 1.36      | 1.000              |
| 7DRM    | 48              | 2-A/B                                 | 4     | 0.9803   | 1.28      | 1.000              |
| 7DRM    | 48              | 3-A/B                                 | 2     | 0.9752   | 1.44      | 1.000              |
| 7DRM    | 48              | 4-A/B                                 | 1     | 0.9758   | 1.42      | 1.000              |
| 7DRM    | 48              | 5-A/B                                 | 3     | 0.9776   | 1.39      | 1.000              |
| 7DRM    | 48              | 1-C/D                                 | 5     | 0.9689   | 1.79      | 0.997              |
| 7DRM    | 48              | 2-C/D                                 | 4     | 0.9702   | 1.82      | 0.997              |
| 7DRM    | 48              | 3-C/D                                 | 2     | 0.9652   | 1.93      | 0.997              |
| 7DRM    | 48              | 4-C/D                                 | 1     | 0.9654   | 1.91      | 0.997              |
| 7DRM    | 48              | 5-C/D                                 | 3     | 0.9705   | 1.66      | 0.997              |
| 7M4S    | 48              | 1-A/D                                 | 3     | 0.9368   | 3.55      | 1.000              |
| 7M4S    | 48              | 2-A/D                                 | 1     | 0.9450   | 3.35      | 1.000              |
| 7M4S    | 48              | 3-A/D                                 | 4     | 0.9473   | 3.38      | 1.000              |
| 7M4S    | 48              | 4-A/D                                 | 5     | 0.9448   | 3.38      | 1.000              |
| 7M4S    | 48              | 5-A/D                                 | 2     | 0.9444   | 3.42      | 1.000              |
| 7M4S    | 48              | 1-B/C                                 | 3     | 0.9308   | 3.41      | 1.000              |
| 7M4S    | 48              | 2-B/C                                 | 1     | 0.9378   | 3.28      | 1.000              |
| 7M4S    | 48              | 3-B/C                                 | 4     | 0.9421   | 3.21      | 1.000              |
| 7M4S    | 48              | 4-B/C                                 | 5     | 0.9398   | 3.20      | 1.000              |
| 7M4S    | 48              | 5-B/C                                 | 2     | 0.9378   | 3.28      | 1.000              |
| 7MGV    | 48              | 1-A/B                                 | 5     | 0.9588   | 3.01      | 1.000              |
| 7MGV    | 48              | 2-A/B                                 | 1     | 0.9583   | 3.04      | 1.000              |
| 7MGV    | 48              | 3-A/B                                 | 2     | 0.9501   | 3.14      | 1.000              |

| PDB ID: | Recycle Number: | Model Number and PDB Reference Chain: | Rank: | TMscore: | RMSD (Å): | Sequence Identity: |
|---------|-----------------|---------------------------------------|-------|----------|-----------|--------------------|
| 7MGV    | 48              | 4-A/B                                 | 3     | 0.9524   | 3.16      | 1.000              |
| 7MGV    | 48              | 5-A/B                                 | 4     | 0.9584   | 3.05      | 1.000              |
| 3VPB    | 72              | 1-A/B                                 | 4     | 0.9913   | 0.79      | 1.000              |
| 3VPB    | 72              | 2-A/B                                 | 3     | 0.9912   | 0.79      | 1.000              |
| 3VPB    | 72              | 3-A/B                                 | 5     | 0.9908   | 0.81      | 1.000              |
| 3VPB    | 72              | 4-A/B                                 | 2     | 0.9908   | 0.81      | 1.000              |
| 3VPB    | 72              | 5-A/B                                 | 1     | 0.9912   | 0.79      | 1.000              |
| 3VPB    | 72              | 1-C/D                                 | 4     | 0.9951   | 0.59      | 1.000              |
| 3VPB    | 72              | 2-C/D                                 | 3     | 0.9954   | 0.57      | 1.000              |
| 3VPB    | 72              | 3-C/D                                 | 5     | 0.9943   | 0.64      | 1.000              |
| 3VPB    | 72              | 4-C/D                                 | 2     | 0.9949   | 0.60      | 1.000              |
| 3VPB    | 72              | 5-C/D                                 | 1     | 0.9952   | 0.58      | 1.000              |
| 3VPD    | 72              | 1-A/B                                 | 5     | 0.9896   | 0.88      | 1.000              |
| 3VPD    | 72              | 2-A/B                                 | 4     | 0.9902   | 0.85      | 1.000              |
| 3VPD    | 72              | 3-A/B                                 | 1     | 0.9910   | 0.81      | 1.000              |
| 3VPD    | 72              | 4-A/B                                 | 2     | 0.9905   | 0.84      | 1.000              |
| 3VPD    | 72              | 5-A/B                                 | 3     | 0.9896   | 0.88      | 1.000              |
| 5IG9    | 72              | 1-A/B                                 | 1     | 0.9678   | 3.42      | 0.981              |
| 5IG9    | 72              | 2-A/B                                 | 2     | 0.9686   | 3.42      | 0.981              |
| 5IG9    | 72              | 3-A/B                                 | 5     | 0.9693   | 3.44      | 0.981              |
| 5IG9    | 72              | 4-A/B                                 | 4     | 0.9673   | 3.45      | 0.981              |
| 5IG9    | 72              | 5-A/B                                 | 3     | 0.9667   | 3.46      | 0.981              |
| 5IG9    | 72              | 1-C/D                                 | 1     | 0.9738   | 2.48      | 0.984              |
| 5IG9    | 72              | 2-C/D                                 | 2     | 0.9747   | 2.48      | 0.984              |
| 5IG9    | 72              | 3-C/D                                 | 5     | 0.9754   | 2.49      | 0.984              |
| 5IG9    | 72              | 4-C/D                                 | 4     | 0.9733   | 2.51      | 0.984              |
| 5IG9    | 72              | 5-C/D                                 | 3     | 0.9725   | 2.50      | 0.984              |
| 5IG9    | 72              | 1-E/H                                 | 1     | 0.9709   | 2.72      | 0.982              |
| 5IG9    | 72              | 2-E/H                                 | 2     | 0.9720   | 2.71      | 0.982              |
| 5IG9    | 72              | 3-E/H                                 | 5     | 0.9723   | 2.74      | 0.982              |
| 5IG9    | 72              | 4-E/H                                 | 4     | 0.9707   | 2.76      | 0.982              |
| 5IG9    | 72              | 5-E/H                                 | 3     | 0.9695   | 2.76      | 0.982              |
| 5IG9    | 72              | 1-F/G                                 | 1     | 0.9733   | 2.76      | 0.984              |
| 5IG9    | 72              | 2-F/G                                 | 2     | 0.9745   | 2.75      | 0.984              |
| 5IG9    | 72              | 3-F/G                                 | 5     | 0.9748   | 2.77      | 0.984              |
| 5IG9    | 72              | 4-F/G                                 | 4     | 0.9730   | 2.80      | 0.984              |
| 5IG9    | 72              | 5-F/G                                 | 3     | 0.9722   | 2.79      | 0.984              |
| 7DRM    | 72              | 1-A/B                                 | 5     | 0.9774   | 1.37      | 1.000              |
| 7DRM    | 72              | 2-A/B                                 | 4     | 0.9809   | 1.26      | 1.000              |
| 7DRM    | 72              | 3-A/B                                 | 2     | 0.9705   | 1.71      | 1.000              |
| 7DRM    | 72              | 4-A/B                                 | 1     | 0.9760   | 1.41      | 1.000              |
| 7DRM    | 72              | 5-A/B                                 | 3     | 0.9774   | 1.40      | 1.000              |
| 7DRM    | 72              | 1-C/D                                 | 5     | 0.9688   | 1.79      | 0.997              |
| 7DRM    | 72              | 2-C/D                                 | 4     | 0.9706   | 1.82      | 0.997              |
| 7DRM    | 72              | 3-C/D                                 | 2     | 0.9621   | 2.01      | 0.997              |
| 7DRM    | 72              | 4-C/D                                 | 1     | 0.9659   | 1.86      | 0.997              |
| 7DRM    | 72              | 5-C/D                                 | 3     | 0.9703   | 1.66      | 0.997              |
| 7M4S    | 72              | 1-A/D                                 | 3     | 0.9374   | 3.56      | 1.000              |
| 7M4S    | 72              | 2-A/D                                 | 1     | 0.9450   | 3.36      | 1.000              |
| 7M4S    | 72              | 3-A/D                                 | 5     | 0.9473   | 3.38      | 1.000              |
| 7M4S    | 72              | 4-A/D                                 | 4     | 0.9450   | 3.39      | 1.000              |
| 7M4S    | 72              | 5-A/D                                 | 2     | 0.9448   | 3.39      | 1.000              |
| 7M4S    | 72              | 1-B/C                                 | 3     | 0.9311   | 3.42      | 1.000              |
| 7M4S    | 72              | 2-B/C                                 | 1     | 0.9387   | 3.19      | 1.000              |
| 7M4S    | 72              | 3-B/C                                 | 5     | 0.9422   | 3.21      | 1.000              |
| 7M4S    | 72              | 4-B/C                                 | 4     | 0.9402   | 3.20      | 1.000              |
| 7M4S    | 72              | 5-B/C                                 | 2     | 0.9381   | 3.25      | 1.000              |
| 7MGV    | 72              | 1-A/B                                 | 5     | 0.9602   | 2.99      | 1.000              |
| 7MGV    | 72              | 2-A/B                                 | 1     | 0.9595   | 3.02      | 1.000              |
| 7MGV    | 72              | 3-A/B                                 | 4     | 0.9508   | 3.13      | 1.000              |
| 7MGV    | 72              | 4-A/B                                 | 2     | 0.9529   | 3.14      | 1.000              |
| 7MGV    | 72              | 5-A/B                                 | 3     | 0.9596   | 3.03      | 1.000              |

**Table S5.** Dimer ATP Grasp Ligase RiPP biosynthetic enzyme US-align results with template. Enzymes with multiple available reference subunits are denoted with their corresponding chain letters.

| PDB ID: | Recycle Number: | Model Number and PDB Reference Chain: | Rank: | TMscore: | RMSD (Å): | Sequence Identity: |
|---------|-----------------|---------------------------------------|-------|----------|-----------|--------------------|
| 3VPB    | 3               | 1-A/B                                 | 4     | 0.9929   | 0.71      | 1.000              |
| 3VPB    | 3               | 2-A/B                                 | 2     | 0.9922   | 0.75      | 1.000              |
| 3VPB    | 3               | 3-A/B                                 | 5     | 0.9925   | 0.73      | 1.000              |
| 3VPB    | 3               | 4-A/B                                 | 1     | 0.9920   | 0.75      | 1.000              |
| 3VPB    | 3               | 5-A/B                                 | 3     | 0.9923   | 0.74      | 1.000              |
| 3VPB    | 3               | 1-C/D                                 | 4     | 0.9953   | 0.58      | 1.000              |
| 3VPB    | 3               | 2-C/D                                 | 2     | 0.9956   | 0.56      | 1.000              |
| 3VPB    | 3               | 3-C/D                                 | 5     | 0.9948   | 0.60      | 1.000              |
| 3VPB    | 3               | 4-C/D                                 | 1     | 0.9952   | 0.58      | 1.000              |
| 3VPB    | 3               | 5-C/D                                 | 3     | 0.9951   | 0.59      | 1.000              |
| 3VPD    | 3               | 1-A/B                                 | 5     | 0.9944   | 0.65      | 1.000              |
| 3VPD    | 3               | 2-A/B                                 | 4     | 0.9952   | 0.60      | 1.000              |
| 3VPD    | 3               | 3-A/B                                 | 3     | 0.9947   | 0.63      | 1.000              |
| 3VPD    | 3               | 4-A/B                                 | 1     | 0.9947   | 0.63      | 1.000              |
| 3VPD    | 3               | 5-A/B                                 | 2     | 0.9947   | 0.63      | 1.000              |
| 5IG9    | 3               | 1-A/B                                 | 3     | 0.9783   | 3.35      | 0.981              |
| 5IG9    | 3               | 2-A/B                                 | 2     | 0.9788   | 3.40      | 0.981              |
| 5IG9    | 3               | 3-A/B                                 | 5     | 0.9779   | 3.38      | 0.981              |
| 5IG9    | 3               | 4-A/B                                 | 4     | 0.9786   | 3.41      | 0.981              |
| 5IG9    | 3               | 5-A/B                                 | 1     | 0.9780   | 3.39      | 0.981              |
| 5IG9    | 3               | 1-C/D                                 | 3     | 0.9839   | 2.37      | 0.984              |
| 5IG9    | 3               | 2-C/D                                 | 2     | 0.9844   | 2.39      | 0.984              |
| 5IG9    | 3               | 3-C/D                                 | 5     | 0.9836   | 2.40      | 0.984              |
| 5IG9    | 3               | 4-C/D                                 | 4     | 0.9842   | 2.40      | 0.984              |
| 5IG9    | 3               | 5-C/D                                 | 1     | 0.9837   | 2.41      | 0.984              |
| 5IG9    | 3               | 1-E/H                                 | 3     | 0.9814   | 2.63      | 0.982              |
| 5IG9    | 3               | 2-E/H                                 | 2     | 0.9818   | 2.68      | 0.982              |
| 5IG9    | 3               | 3-E/H                                 | 5     | 0.9811   | 2.66      | 0.982              |
| 5IG9    | 3               | 4-E/H                                 | 4     | 0.9816   | 2.69      | 0.982              |
| 5IG9    | 3               | 5-E/H                                 | 1     | 0.9812   | 2.68      | 0.982              |
| 5IG9    | 3               | 1-F/G                                 | 3     | 0.9830   | 2.68      | 0.984              |
| 5IG9    | 3               | 2-F/G                                 | 2     | 0.9835   | 2.73      | 0.984              |
| 5IG9    | 3               | 3-F/G                                 | 5     | 0.9827   | 2.71      | 0.984              |
| 5IG9    | 3               | 4-F/G                                 | 4     | 0.9833   | 2.74      | 0.984              |
| 5IG9    | 3               | 5-F/G                                 | 1     | 0.9828   | 2.73      | 0.984              |
| 7DRM    | 3               | 1-A/B                                 | 3     | 0.9711   | 1.98      | 1.000              |
| 7DRM    | 3               | 2-A/B                                 | 1     | 0.9688   | 2.04      | 1.000              |
| 7DRM    | 3               | 3-A/B                                 | 4     | 0.9743   | 1.92      | 1.000              |
| 7DRM    | 3               | 4-A/B                                 | 5     | 0.9766   | 1.40      | 1.000              |
| 7DRM    | 3               | 5-A/B                                 | 2     | 0.9746   | 1.88      | 1.000              |
| 7DRM    | 3               | 1-C/D                                 | 3     | 0.9600   | 2.65      | 0.997              |
| 7DRM    | 3               | 2-C/D                                 | 1     | 0.9593   | 2.58      | 0.997              |
| 7DRM    | 3               | 3-C/D                                 | 4     | 0.9638   | 2.53      | 0.997              |
| 7DRM    | 3               | 4-C/D                                 | 5     | 0.9680   | 1.82      | 0.997              |
| 7DRM    | 3               | 5-C/D                                 | 2     | 0.9647   | 2.48      | 0.997              |
| 7M4S    | 3               | 1-A/D                                 | 1     | 0.9432   | 3.45      | 1.000              |
| 7M4S    | 3               | 2-A/D                                 | 4     | 0.9446   | 3.29      | 1.000              |
| 7M4S    | 3               | 3-A/D                                 | 5     | 0.9477   | 3.23      | 1.000              |
| 7M4S    | 3               | 4-A/D                                 | 2     | 0.9428   | 3.51      | 1.000              |
| 7M4S    | 3               | 5-A/D                                 | 3     | 0.9452   | 3.34      | 1.000              |
| 7M4S    | 3               | 1-B/C                                 | 1     | 0.9402   | 3.21      | 1.000              |
| 7M4S    | 3               | 2-B/C                                 | 4     | 0.9428   | 3.01      | 1.000              |
| 7M4S    | 3               | 3-B/C                                 | 5     | 0.9455   | 2.97      | 1.000              |
| 7M4S    | 3               | 4-B/C                                 | 2     | 0.9408   | 3.27      | 1.000              |
| 7M4S    | 3               | 5-B/C                                 | 3     | 0.9414   | 3.08      | 1.000              |
| 7MGV    | 3               | 1-A/B                                 | 3     | 0.9618   | 3.02      | 1.000              |
| 7MGV    | 3               | 2-A/B                                 | 1     | 0.9626   | 3.04      | 1.000              |



| PDB ID: | Recycle Number: | Model Number and PDB Reference Chain: | Rank: | TMscore: | RMSD (Å): | Sequence Identity: |
|---------|-----------------|---------------------------------------|-------|----------|-----------|--------------------|
| 7MGV    | 3               | 3-A/B                                 | 5     | 0.9564   | 3.10      | 1.000              |
| 7MGV    | 3               | 4-A/B                                 | 4     | 0.9566   | 3.14      | 1.000              |
| 7MGV    | 3               | 5-A/B                                 | 2     | 0.9604   | 3.08      | 1.000              |
| 3VPB    | 12              | 1-A/B                                 | 5     | 0.9919   | 0.76      | 1.000              |
| 3VPB    | 12              | 2-A/B                                 | 3     | 0.9919   | 0.76      | 1.000              |
| 3VPB    | 12              | 3-A/B                                 | 2     | 0.9917   | 0.77      | 1.000              |
| 3VPB    | 12              | 4-A/B                                 | 1     | 0.9920   | 0.75      | 1.000              |
| 3VPB    | 12              | 5-A/B                                 | 4     | 0.9922   | 0.74      | 1.000              |
| 3VPB    | 12              | 1-C/D                                 | 5     | 0.9945   | 0.63      | 1.000              |
| 3VPB    | 12              | 2-C/D                                 | 3     | 0.9956   | 0.56      | 1.000              |
| 3VPB    | 12              | 3-C/D                                 | 2     | 0.9940   | 0.65      | 1.000              |
| 3VPB    | 12              | 4-C/D                                 | 1     | 0.9950   | 0.59      | 1.000              |
| 3VPB    | 12              | 5-C/D                                 | 4     | 0.9946   | 0.62      | 1.000              |
| 3VPD    | 12              | 1-A/B                                 | 5     | 0.9944   | 0.65      | 1.000              |
| 3VPD    | 12              | 2-A/B                                 | 4     | 0.9947   | 0.63      | 1.000              |
| 3VPD    | 12              | 3-A/B                                 | 2     | 0.9946   | 0.63      | 1.000              |
| 3VPD    | 12              | 4-A/B                                 | 1     | 0.9946   | 0.63      | 1.000              |
| 3VPD    | 12              | 5-A/B                                 | 3     | 0.9946   | 0.64      | 1.000              |
| 5IG9    | 12              | 1-A/B                                 | 4     | 0.9784   | 3.33      | 0.981              |
| 5IG9    | 12              | 2-A/B                                 | 1     | 0.9783   | 3.38      | 0.981              |
| 5IG9    | 12              | 3-A/B                                 | 5     | 0.9780   | 3.36      | 0.981              |
| 5IG9    | 12              | 4-A/B                                 | 3     | 0.9786   | 3.40      | 0.981              |
| 5IG9    | 12              | 5-A/B                                 | 2     | 0.9779   | 3.37      | 0.981              |
| 5IG9    | 12              | 1-C/D                                 | 4     | 0.9839   | 2.35      | 0.984              |
| 5IG9    | 12              | 2-C/D                                 | 1     | 0.9839   | 2.40      | 0.984              |
| 5IG9    | 12              | 3-C/D                                 | 5     | 0.9836   | 2.38      | 0.984              |
| 5IG9    | 12              | 4-C/D                                 | 3     | 0.9842   | 2.40      | 0.984              |
| 5IG9    | 12              | 5-C/D                                 | 2     | 0.9835   | 2.39      | 0.984              |
| 5IG9    | 12              | 1-E/H                                 | 4     | 0.9814   | 2.61      | 0.982              |
| 5IG9    | 12              | 2-E/H                                 | 1     | 0.9815   | 2.66      | 0.982              |
| 5IG9    | 12              | 3-E/H                                 | 5     | 0.9812   | 2.64      | 0.982              |
| 5IG9    | 12              | 4-E/H                                 | 3     | 0.9815   | 2.68      | 0.982              |
| 5IG9    | 12              | 5-E/H                                 | 2     | 0.9810   | 2.65      | 0.982              |
| 5IG9    | 12              | 1-F/G                                 | 4     | 0.9830   | 2.66      | 0.984              |
| 5IG9    | 12              | 2-F/G                                 | 1     | 0.9830   | 2.71      | 0.984              |
| 5IG9    | 12              | 3-F/G                                 | 5     | 0.9828   | 2.69      | 0.984              |
| 5IG9    | 12              | 4-F/G                                 | 3     | 0.9833   | 2.72      | 0.984              |
| 5IG9    | 12              | 5-F/G                                 | 2     | 0.9827   | 2.70      | 0.984              |
| 7DRM    | 12              | 1-A/B                                 | 5     | 0.9691   | 2.00      | 1.000              |
| 7DRM    | 12              | 2-A/B                                 | 1     | 0.9755   | 1.43      | 1.000              |
| 7DRM    | 12              | 3-A/B                                 | 2     | 0.9709   | 1.99      | 1.000              |
| 7DRM    | 12              | 4-A/B                                 | 4     | 0.9773   | 1.38      | 1.000              |
| 7DRM    | 12              | 5-A/B                                 | 3     | 0.9760   | 1.43      | 1.000              |
| 7DRM    | 12              | 1-C/D                                 | 5     | 0.9604   | 2.53      | 0.997              |
| 7DRM    | 12              | 2-C/D                                 | 1     | 0.9670   | 1.86      | 0.997              |
| 7DRM    | 12              | 3-C/D                                 | 2     | 0.9606   | 2.58      | 0.997              |
| 7DRM    | 12              | 4-C/D                                 | 4     | 0.9688   | 1.78      | 0.997              |
| 7DRM    | 12              | 5-C/D                                 | 3     | 0.9699   | 1.67      | 0.997              |
| 7M4S    | 12              | 1-A/D                                 | 1     | 0.9442   | 3.44      | 1.000              |
| 7M4S    | 12              | 2-A/D                                 | 2     | 0.9440   | 3.32      | 1.000              |
| 7M4S    | 12              | 3-A/D                                 | 4     | 0.9489   | 3.22      | 1.000              |
| 7M4S    | 12              | 4-A/D                                 | 3     | 0.9457   | 3.45      | 1.000              |
| 7M4S    | 12              | 5-A/D                                 | 5     | 0.9448   | 3.33      | 1.000              |
| 7M4S    | 12              | 1-B/C                                 | 1     | 0.9401   | 3.23      | 1.000              |
| 7M4S    | 12              | 2-B/C                                 | 2     | 0.9421   | 3.02      | 1.000              |
| 7M4S    | 12              | 3-B/C                                 | 4     | 0.9456   | 2.98      | 1.000              |
| 7M4S    | 12              | 4-B/C                                 | 3     | 0.9425   | 3.22      | 1.000              |
| 7M4S    | 12              | 5-B/C                                 | 5     | 0.9411   | 3.07      | 1.000              |
| 7MGV    | 12              | 1-A/B                                 | 4     | 0.9607   | 2.97      | 1.000              |
| 7MGV    | 12              | 2-A/B                                 | 1     | 0.9595   | 3.05      | 1.000              |
| 7MGV    | 12              | 3-A/B                                 | 5     | 0.9571   | 3.04      | 1.000              |
| 7MGV    | 12              | 4-A/B                                 | 3     | 0.9586   | 3.10      | 1.000              |
| 7MGV    | 12              | 5-A/B                                 | 2     | 0.9603   | 3.04      | 1.000              |
| 3VPB    | 24              | 1-A/B                                 | 4     | 0.9921   | 0.75      | 1.000              |

| PDB ID: | Recycle Number: | Model Number and PDB Reference Chain: | Rank: | TMscore: | RMSD (Å): | Sequence Identity: |
|---------|-----------------|---------------------------------------|-------|----------|-----------|--------------------|
| 3VPB    | 24              | 2-A/B                                 | 1     | 0.9919   | 0.76      | 1.000              |
| 3VPB    | 24              | 3-A/B                                 | 2     | 0.9917   | 0.77      | 1.000              |
| 3VPB    | 24              | 4-A/B                                 | 3     | 0.9924   | 0.73      | 1.000              |
| 3VPB    | 24              | 5-A/B                                 | 5     | 0.9925   | 0.73      | 1.000              |
| 3VPB    | 24              | 1-C/D                                 | 4     | 0.9944   | 0.63      | 1.000              |
| 3VPB    | 24              | 2-C/D                                 | 1     | 0.9958   | 0.54      | 1.000              |
| 3VPB    | 24              | 3-C/D                                 | 2     | 0.9938   | 0.66      | 1.000              |
| 3VPB    | 24              | 4-C/D                                 | 3     | 0.9953   | 0.57      | 1.000              |
| 3VPB    | 24              | 5-C/D                                 | 5     | 0.9947   | 0.61      | 1.000              |
| 3VPD    | 24              | 1-A/B                                 | 5     | 0.9944   | 0.65      | 1.000              |
| 3VPD    | 24              | 2-A/B                                 | 3     | 0.9947   | 0.63      | 1.000              |
| 3VPD    | 24              | 3-A/B                                 | 2     | 0.9947   | 0.63      | 1.000              |
| 3VPD    | 24              | 4-A/B                                 | 1     | 0.9946   | 0.64      | 1.000              |
| 3VPD    | 24              | 5-A/B                                 | 4     | 0.9946   | 0.64      | 1.000              |
| 5IG9    | 24              | 1-A/B                                 | 4     | 0.9784   | 3.33      | 0.981              |
| 5IG9    | 24              | 2-A/B                                 | 2     | 0.9782   | 3.35      | 0.981              |
| 5IG9    | 24              | 3-A/B                                 | 5     | 0.9782   | 3.35      | 0.981              |
| 5IG9    | 24              | 4-A/B                                 | 3     | 0.9784   | 3.40      | 0.981              |
| 5IG9    | 24              | 5-A/B                                 | 1     | 0.9780   | 3.36      | 0.981              |
| 5IG9    | 24              | 1-C/D                                 | 4     | 0.9839   | 2.35      | 0.984              |
| 5IG9    | 24              | 2-C/D                                 | 2     | 0.9838   | 2.38      | 0.984              |
| 5IG9    | 24              | 3-C/D                                 | 5     | 0.9838   | 2.37      | 0.984              |
| 5IG9    | 24              | 4-C/D                                 | 3     | 0.9840   | 2.42      | 0.984              |
| 5IG9    | 24              | 5-C/D                                 | 1     | 0.9836   | 2.38      | 0.984              |
| 5IG9    | 24              | 1-E/H                                 | 4     | 0.9814   | 2.61      | 0.982              |
| 5IG9    | 24              | 2-E/H                                 | 2     | 0.9813   | 2.64      | 0.982              |
| 5IG9    | 24              | 3-E/H                                 | 5     | 0.9813   | 2.64      | 0.982              |
| 5IG9    | 24              | 4-E/H                                 | 3     | 0.9815   | 2.69      | 0.982              |
| 5IG9    | 24              | 5-E/H                                 | 1     | 0.9811   | 2.65      | 0.982              |
| 5IG9    | 24              | 1-F/G                                 | 4     | 0.9830   | 2.66      | 0.984              |
| 5IG9    | 24              | 2-F/G                                 | 2     | 0.9829   | 2.69      | 0.984              |
| 5IG9    | 24              | 3-F/G                                 | 5     | 0.9829   | 2.68      | 0.984              |
| 5IG9    | 24              | 4-F/G                                 | 3     | 0.9830   | 2.74      | 0.984              |
| 5IG9    | 24              | 5-F/G                                 | 1     | 0.9827   | 2.70      | 0.984              |
| 7DRM    | 24              | 1-A/B                                 | 4     | 0.9758   | 1.44      | 1.000              |
| 7DRM    | 24              | 2-A/B                                 | 3     | 0.9755   | 1.43      | 1.000              |
| 7DRM    | 24              | 3-A/B                                 | 1     | 0.9745   | 1.50      | 1.000              |
| 7DRM    | 24              | 4-A/B                                 | 5     | 0.9779   | 1.36      | 1.000              |
| 7DRM    | 24              | 5-A/B                                 | 2     | 0.9748   | 1.48      | 1.000              |
| 7DRM    | 24              | 1-C/D                                 | 4     | 0.9696   | 1.67      | 0.997              |
| 7DRM    | 24              | 2-C/D                                 | 3     | 0.9671   | 1.85      | 0.997              |
| 7DRM    | 24              | 3-C/D                                 | 1     | 0.9660   | 1.87      | 0.997              |
| 7DRM    | 24              | 4-C/D                                 | 5     | 0.9693   | 1.77      | 0.997              |
| 7DRM    | 24              | 5-C/D                                 | 2     | 0.9688   | 1.70      | 0.997              |
| 7M4S    | 24              | 1-A/D                                 | 1     | 0.9447   | 3.43      | 1.000              |
| 7M4S    | 24              | 2-A/D                                 | 5     | 0.9441   | 3.32      | 1.000              |
| 7M4S    | 24              | 3-A/D                                 | 4     | 0.9499   | 3.21      | 1.000              |
| 7M4S    | 24              | 4-A/D                                 | 2     | 0.9467   | 3.45      | 1.000              |
| 7M4S    | 24              | 5-A/D                                 | 3     | 0.9452   | 3.33      | 1.000              |
| 7M4S    | 24              | 1-B/C                                 | 1     | 0.9401   | 3.23      | 1.000              |
| 7M4S    | 24              | 2-B/C                                 | 5     | 0.9422   | 3.02      | 1.000              |
| 7M4S    | 24              | 3-B/C                                 | 4     | 0.9459   | 2.99      | 1.000              |
| 7M4S    | 24              | 4-B/C                                 | 2     | 0.9430   | 3.23      | 1.000              |
| 7M4S    | 24              | 5-B/C                                 | 3     | 0.9413   | 3.07      | 1.000              |
| 7MGV    | 24              | 1-A/B                                 | 5     | 0.9611   | 2.95      | 1.000              |
| 7MGV    | 24              | 2-A/B                                 | 1     | 0.9592   | 3.04      | 1.000              |
| 7MGV    | 24              | 3-A/B                                 | 4     | 0.9581   | 3.02      | 1.000              |
| 7MGV    | 24              | 4-A/B                                 | 3     | 0.9593   | 3.09      | 1.000              |
| 7MGV    | 24              | 5-A/B                                 | 2     | 0.9602   | 3.03      | 1.000              |
| 3VPB    | 48              | 1-A/B                                 | 5     | 0.9921   | 0.75      | 1.000              |
| 3VPB    | 48              | 2-A/B                                 | 3     | 0.9919   | 0.76      | 1.000              |
| 3VPB    | 48              | 3-A/B                                 | 1     | 0.9917   | 0.77      | 1.000              |
| 3VPB    | 48              | 4-A/B                                 | 2     | 0.9925   | 0.73      | 1.000              |
| 3VPB    | 48              | 5-A/B                                 | 4     | 0.9926   | 0.73      | 1.000              |

| PDB ID: | Recycle Number: | Model Number and PDB Reference Chain: | Rank: | TMscore: | RMSD (Å): | Sequence Identity: |
|---------|-----------------|---------------------------------------|-------|----------|-----------|--------------------|
| 3VPB    | 48              | 1-C/D                                 | 5     | 0.9943   | 0.64      | 1.000              |
| 3VPB    | 48              | 2-C/D                                 | 3     | 0.9958   | 0.55      | 1.000              |
| 3VPB    | 48              | 3-C/D                                 | 1     | 0.9937   | 0.67      | 1.000              |
| 3VPB    | 48              | 4-C/D                                 | 2     | 0.9953   | 0.58      | 1.000              |
| 3VPB    | 48              | 5-C/D                                 | 4     | 0.9947   | 0.61      | 1.000              |
| 3VPD    | 48              | 1-A/B                                 | 5     | 0.9944   | 0.65      | 1.000              |
| 3VPD    | 48              | 2-A/B                                 | 4     | 0.9947   | 0.63      | 1.000              |
| 3VPD    | 48              | 3-A/B                                 | 3     | 0.9947   | 0.63      | 1.000              |
| 3VPD    | 48              | 4-A/B                                 | 1     | 0.9946   | 0.64      | 1.000              |
| 3VPD    | 48              | 5-A/B                                 | 2     | 0.9946   | 0.64      | 1.000              |
| 5IG9    | 48              | 1-A/B                                 | 3     | 0.9784   | 3.33      | 0.981              |
| 5IG9    | 48              | 2-A/B                                 | 1     | 0.9782   | 3.36      | 0.981              |
| 5IG9    | 48              | 3-A/B                                 | 5     | 0.9781   | 3.36      | 0.981              |
| 5IG9    | 48              | 4-A/B                                 | 4     | 0.9781   | 3.37      | 0.981              |
| 5IG9    | 48              | 5-A/B                                 | 2     | 0.9780   | 3.37      | 0.981              |
| 5IG9    | 48              | 1-C/D                                 | 3     | 0.9839   | 2.35      | 0.984              |
| 5IG9    | 48              | 2-C/D                                 | 1     | 0.9838   | 2.38      | 0.984              |
| 5IG9    | 48              | 3-C/D                                 | 5     | 0.9837   | 2.38      | 0.984              |
| 5IG9    | 48              | 4-C/D                                 | 4     | 0.9837   | 2.40      | 0.984              |
| 5IG9    | 48              | 5-C/D                                 | 2     | 0.9836   | 2.39      | 0.984              |
| 5IG9    | 48              | 1-E/H                                 | 3     | 0.9815   | 2.61      | 0.982              |
| 5IG9    | 48              | 2-E/H                                 | 1     | 0.9814   | 2.64      | 0.982              |
| 5IG9    | 48              | 3-E/H                                 | 5     | 0.9813   | 2.64      | 0.982              |
| 5IG9    | 48              | 4-E/H                                 | 4     | 0.9813   | 2.66      | 0.982              |
| 5IG9    | 48              | 5-E/H                                 | 2     | 0.9811   | 2.66      | 0.982              |
| 5IG9    | 48              | 1-F/G                                 | 3     | 0.9831   | 2.66      | 0.984              |
| 5IG9    | 48              | 2-F/G                                 | 1     | 0.9829   | 2.69      | 0.984              |
| 5IG9    | 48              | 3-F/G                                 | 5     | 0.9828   | 2.69      | 0.984              |
| 5IG9    | 48              | 4-F/G                                 | 4     | 0.9828   | 2.71      | 0.984              |
| 5IG9    | 48              | 5-F/G                                 | 2     | 0.9827   | 2.71      | 0.984              |
| 7DRM    | 48              | 1-A/B                                 | 4     | 0.9754   | 1.45      | 1.000              |
| 7DRM    | 48              | 2-A/B                                 | 3     | 0.9744   | 1.46      | 1.000              |
| 7DRM    | 48              | 3-A/B                                 | 1     | 0.9750   | 1.47      | 1.000              |
| 7DRM    | 48              | 4-A/B                                 | 5     | 0.9778   | 1.36      | 1.000              |
| 7DRM    | 48              | 5-A/B                                 | 2     | 0.9748   | 1.47      | 1.000              |
| 7DRM    | 48              | 1-C/D                                 | 4     | 0.9691   | 1.69      | 0.997              |
| 7DRM    | 48              | 2-C/D                                 | 3     | 0.9661   | 1.89      | 0.997              |
| 7DRM    | 48              | 3-C/D                                 | 1     | 0.9666   | 1.80      | 0.997              |
| 7DRM    | 48              | 4-C/D                                 | 5     | 0.9693   | 1.77      | 0.997              |
| 7DRM    | 48              | 5-C/D                                 | 2     | 0.9687   | 1.71      | 0.997              |
| 7M4S    | 48              | 1-A/D                                 | 1     | 0.9437   | 3.43      | 1.000              |
| 7M4S    | 48              | 2-A/D                                 | 3     | 0.9432   | 3.32      | 1.000              |
| 7M4S    | 48              | 3-A/D                                 | 5     | 0.9490   | 3.21      | 1.000              |
| 7M4S    | 48              | 4-A/D                                 | 2     | 0.9462   | 3.45      | 1.000              |
| 7M4S    | 48              | 5-A/D                                 | 4     | 0.9441   | 3.34      | 1.000              |
| 7M4S    | 48              | 1-B/C                                 | 1     | 0.9395   | 3.22      | 1.000              |
| 7M4S    | 48              | 2-B/C                                 | 3     | 0.9416   | 3.02      | 1.000              |
| 7M4S    | 48              | 3-B/C                                 | 5     | 0.9453   | 2.98      | 1.000              |
| 7M4S    | 48              | 4-B/C                                 | 2     | 0.9422   | 3.24      | 1.000              |
| 7M4S    | 48              | 5-B/C                                 | 4     | 0.9405   | 3.07      | 1.000              |
| 7MGV    | 48              | 1-A/B                                 | 3     | 0.9597   | 2.97      | 1.000              |
| 7MGV    | 48              | 2-A/B                                 | 1     | 0.9581   | 3.06      | 1.000              |
| 7MGV    | 48              | 3-A/B                                 | 5     | 0.9567   | 3.04      | 1.000              |
| 7MGV    | 48              | 4-A/B                                 | 4     | 0.9579   | 3.12      | 1.000              |
| 7MGV    | 48              | 5-A/B                                 | 2     | 0.9572   | 3.07      | 1.000              |
| 3VPB    | 72              | 1-A/B                                 | 5     | 0.9920   | 0.75      | 1.000              |
| 3VPB    | 72              | 2-A/B                                 | 3     | 0.9918   | 0.76      | 1.000              |
| 3VPB    | 72              | 3-A/B                                 | 2     | 0.9916   | 0.77      | 1.000              |
| 3VPB    | 72              | 4-A/B                                 | 1     | 0.9926   | 0.73      | 1.000              |
| 3VPB    | 72              | 5-A/B                                 | 4     | 0.9924   | 0.74      | 1.000              |
| 3VPB    | 72              | 1-C/D                                 | 5     | 0.9943   | 0.64      | 1.000              |
| 3VPB    | 72              | 2-C/D                                 | 3     | 0.9957   | 0.55      | 1.000              |
| 3VPB    | 72              | 3-C/D                                 | 2     | 0.9937   | 0.67      | 1.000              |
| 3VPB    | 72              | 4-C/D                                 | 1     | 0.9954   | 0.57      | 1.000              |

| PDB ID: | Recycle Number: | Model Number and PDB Reference Chain: | Rank: | TMscore: | RMSD (Å): | Sequence Identity: |
|---------|-----------------|---------------------------------------|-------|----------|-----------|--------------------|
| 3VPB    | 72              | 5-C/D                                 | 4     | 0.9946   | 0.62      | 1.000              |
| 3VPD    | 72              | 1-A/B                                 | 5     | 0.9945   | 0.65      | 1.000              |
| 3VPD    | 72              | 2-A/B                                 | 4     | 0.9948   | 0.62      | 1.000              |
| 3VPD    | 72              | 3-A/B                                 | 2     | 0.9948   | 0.63      | 1.000              |
| 3VPD    | 72              | 4-A/B                                 | 1     | 0.9947   | 0.63      | 1.000              |
| 3VPD    | 72              | 5-A/B                                 | 3     | 0.9947   | 0.63      | 1.000              |
| 5IG9    | 72              | 1-A/B                                 | 4     | 0.9784   | 3.33      | 0.981              |
| 5IG9    | 72              | 2-A/B                                 | 2     | 0.9781   | 3.35      | 0.981              |
| 5IG9    | 72              | 3-A/B                                 | 5     | 0.9780   | 3.36      | 0.981              |
| 5IG9    | 72              | 4-A/B                                 | 3     | 0.9781   | 3.36      | 0.981              |
| 5IG9    | 72              | 5-A/B                                 | 1     | 0.9779   | 3.37      | 0.981              |
| 5IG9    | 72              | 1-C/D                                 | 4     | 0.9839   | 2.35      | 0.984              |
| 5IG9    | 72              | 2-C/D                                 | 2     | 0.9837   | 2.38      | 0.984              |
| 5IG9    | 72              | 3-C/D                                 | 5     | 0.9837   | 2.38      | 0.984              |
| 5IG9    | 72              | 4-C/D                                 | 3     | 0.9837   | 2.39      | 0.984              |
| 5IG9    | 72              | 5-C/D                                 | 1     | 0.9835   | 2.39      | 0.984              |
| 5IG9    | 72              | 1-E/H                                 | 4     | 0.9814   | 2.61      | 0.982              |
| 5IG9    | 72              | 2-E/H                                 | 2     | 0.9812   | 2.64      | 0.982              |
| 5IG9    | 72              | 3-E/H                                 | 5     | 0.9812   | 2.64      | 0.982              |
| 5IG9    | 72              | 4-E/H                                 | 3     | 0.9812   | 2.65      | 0.982              |
| 5IG9    | 72              | 5-E/H                                 | 1     | 0.9809   | 2.65      | 0.982              |
| 5IG9    | 72              | 1-F/G                                 | 4     | 0.9830   | 2.66      | 0.984              |
| 5IG9    | 72              | 2-F/G                                 | 2     | 0.9828   | 2.69      | 0.984              |
| 5IG9    | 72              | 3-F/G                                 | 5     | 0.9828   | 2.69      | 0.984              |
| 5IG9    | 72              | 4-F/G                                 | 3     | 0.9828   | 2.70      | 0.984              |
| 5IG9    | 72              | 5-F/G                                 | 1     | 0.9826   | 2.70      | 0.984              |
| 7DRM    | 72              | 1-A/B                                 | 4     | 0.9750   | 1.47      | 1.000              |
| 7DRM    | 72              | 2-A/B                                 | 3     | 0.9751   | 1.44      | 1.000              |
| 7DRM    | 72              | 3-A/B                                 | 1     | 0.9751   | 1.46      | 1.000              |
| 7DRM    | 72              | 4-A/B                                 | 5     | 0.9797   | 1.30      | 1.000              |
| 7DRM    | 72              | 5-A/B                                 | 2     | 0.9748   | 1.47      | 1.000              |
| 7DRM    | 72              | 1-C/D                                 | 4     | 0.9686   | 1.71      | 0.997              |
| 7DRM    | 72              | 2-C/D                                 | 3     | 0.9667   | 1.87      | 0.997              |
| 7DRM    | 72              | 3-C/D                                 | 1     | 0.9667   | 1.80      | 0.997              |
| 7DRM    | 72              | 4-C/D                                 | 5     | 0.9709   | 1.72      | 0.997              |
| 7DRM    | 72              | 5-C/D                                 | 2     | 0.9688   | 1.70      | 0.997              |
| 7M4S    | 72              | 1-A/D                                 | 2     | 0.9441   | 3.43      | 1.000              |
| 7M4S    | 72              | 2-A/D                                 | 4     | 0.9439   | 3.32      | 1.000              |
| 7M4S    | 72              | 3-A/D                                 | 5     | 0.9497   | 3.21      | 1.000              |
| 7M4S    | 72              | 4-A/D                                 | 1     | 0.9468   | 3.46      | 1.000              |
| 7M4S    | 72              | 5-A/D                                 | 3     | 0.9479   | 3.25      | 1.000              |
| 7M4S    | 72              | 1-B/C                                 | 2     | 0.9396   | 3.22      | 1.000              |
| 7M4S    | 72              | 2-B/C                                 | 4     | 0.9419   | 3.02      | 1.000              |
| 7M4S    | 72              | 3-B/C                                 | 5     | 0.9458   | 2.98      | 1.000              |
| 7M4S    | 72              | 4-B/C                                 | 1     | 0.9427   | 3.25      | 1.000              |
| 7M4S    | 72              | 5-B/C                                 | 3     | 0.9431   | 3.03      | 1.000              |
| 7MGV    | 72              | 1-A/B                                 | 5     | 0.9609   | 2.95      | 1.000              |
| 7MGV    | 72              | 2-A/B                                 | 1     | 0.9591   | 3.05      | 1.000              |
| 7MGV    | 72              | 3-A/B                                 | 3     | 0.9581   | 3.02      | 1.000              |
| 7MGV    | 72              | 4-A/B                                 | 4     | 0.9583   | 3.10      | 1.000              |
| 7MGV    | 72              | 5-A/B                                 | 2     | 0.9582   | 3.05      | 1.000              |

**Table S6.** Dimer ATP Grasp Ligase RiPP biosynthetic enzyme US-align results with template and AMBER. Enzymes with multiple available reference subunits are denoted with their corresponding chain letters.

| PDB ID: | Recycle Number: | Model Number and PDB Reference Chain: | Rank: | TMscore: | RMSD (Å): | Sequence Identity: |
|---------|-----------------|---------------------------------------|-------|----------|-----------|--------------------|
| 3VPB    | 3               | 1-A/B                                 | 4     | 0.9929   | 0.71      | 1.000              |
| 3VPB    | 3               | 2-A/B                                 | 2     | 0.9922   | 0.75      | 1.000              |
| 3VPB    | 3               | 3-A/B                                 | 5     | 0.9922   | 0.75      | 1.000              |
| 3VPB    | 3               | 4-A/B                                 | 1     | 0.9920   | 0.76      | 1.000              |

| PDB ID: | Recycle Number: | Model Number and PDB Reference Chain: | Rank: | TMscore: | RMSD (Å): | Sequence Identity: |
|---------|-----------------|---------------------------------------|-------|----------|-----------|--------------------|
| 3VPB    | 3               | 5-A/B                                 | 3     | 0.9925   | 0.73      | 1.000              |
| 3VPB    | 3               | 1-C/D                                 | 4     | 0.9952   | 0.58      | 1.000              |
| 3VPB    | 3               | 2-C/D                                 | 2     | 0.9955   | 0.56      | 1.000              |
| 3VPB    | 3               | 3-C/D                                 | 5     | 0.9948   | 0.61      | 1.000              |
| 3VPB    | 3               | 4-C/D                                 | 1     | 0.9951   | 0.59      | 1.000              |
| 3VPB    | 3               | 5-C/D                                 | 3     | 0.9950   | 0.59      | 1.000              |
| 3VPD    | 3               | 1-A/B                                 | 5     | 0.9943   | 0.65      | 1.000              |
| 3VPD    | 3               | 2-A/B                                 | 4     | 0.9951   | 0.61      | 1.000              |
| 3VPD    | 3               | 3-A/B                                 | 3     | 0.9946   | 0.63      | 1.000              |
| 3VPD    | 3               | 4-A/B                                 | 1     | 0.9946   | 0.64      | 1.000              |
| 3VPD    | 3               | 5-A/B                                 | 2     | 0.9946   | 0.64      | 1.000              |
| 5IG9    | 3               | 1-A/B                                 | 3     | 0.9782   | 3.35      | 0.981              |
| 5IG9    | 3               | 2-A/B                                 | 2     | 0.9786   | 3.41      | 0.981              |
| 5IG9    | 3               | 3-A/B                                 | 5     | 0.9779   | 3.38      | 0.981              |
| 5IG9    | 3               | 4-A/B                                 | 4     | 0.9785   | 3.41      | 0.981              |
| 5IG9    | 3               | 5-A/B                                 | 1     | 0.9780   | 3.39      | 0.981              |
| 5IG9    | 3               | 1-C/D                                 | 3     | 0.9837   | 2.37      | 0.984              |
| 5IG9    | 3               | 2-C/D                                 | 2     | 0.9842   | 2.40      | 0.984              |
| 5IG9    | 3               | 3-C/D                                 | 5     | 0.9835   | 2.40      | 0.984              |
| 5IG9    | 3               | 4-C/D                                 | 4     | 0.9841   | 2.41      | 0.984              |
| 5IG9    | 3               | 5-C/D                                 | 1     | 0.9836   | 2.41      | 0.984              |
| 5IG9    | 3               | 1-E/H                                 | 3     | 0.9812   | 2.63      | 0.982              |
| 5IG9    | 3               | 2-E/H                                 | 2     | 0.9816   | 2.69      | 0.982              |
| 5IG9    | 3               | 3-E/H                                 | 5     | 0.9811   | 2.67      | 0.982              |
| 5IG9    | 3               | 4-E/H                                 | 4     | 0.9814   | 2.69      | 0.982              |
| 5IG9    | 3               | 5-E/H                                 | 1     | 0.9811   | 2.68      | 0.982              |
| 5IG9    | 3               | 1-F/G                                 | 3     | 0.9828   | 2.69      | 0.984              |
| 5IG9    | 3               | 2-F/G                                 | 2     | 0.9833   | 2.74      | 0.984              |
| 5IG9    | 3               | 3-F/G                                 | 5     | 0.9826   | 2.72      | 0.984              |
| 5IG9    | 3               | 4-F/G                                 | 4     | 0.9832   | 2.74      | 0.984              |
| 5IG9    | 3               | 5-F/G                                 | 1     | 0.9827   | 2.73      | 0.984              |
| 7DRM    | 3               | 1-A/B                                 | 3     | 0.9709   | 1.99      | 1.000              |
| 7DRM    | 3               | 2-A/B                                 | 1     | 0.9684   | 2.04      | 1.000              |
| 7DRM    | 3               | 3-A/B                                 | 4     | 0.9741   | 1.93      | 1.000              |
| 7DRM    | 3               | 4-A/B                                 | 5     | 0.9764   | 1.41      | 1.000              |
| 7DRM    | 3               | 5-A/B                                 | 2     | 0.9744   | 1.88      | 1.000              |
| 7DRM    | 3               | 1-C/D                                 | 3     | 0.9598   | 2.65      | 0.997              |
| 7DRM    | 3               | 2-C/D                                 | 1     | 0.9590   | 2.59      | 0.997              |
| 7DRM    | 3               | 3-C/D                                 | 4     | 0.9635   | 2.53      | 0.997              |
| 7DRM    | 3               | 4-C/D                                 | 5     | 0.9678   | 1.83      | 0.997              |
| 7DRM    | 3               | 5-C/D                                 | 2     | 0.9645   | 2.48      | 0.997              |
| 7M4S    | 3               | 1-A/D                                 | 1     | 0.9430   | 3.46      | 1.000              |
| 7M4S    | 3               | 2-A/D                                 | 4     | 0.9442   | 3.31      | 1.000              |
| 7M4S    | 3               | 3-A/D                                 | 5     | 0.9473   | 3.24      | 1.000              |
| 7M4S    | 3               | 4-A/D                                 | 2     | 0.9426   | 3.52      | 1.000              |
| 7M4S    | 3               | 5-A/D                                 | 3     | 0.9450   | 3.35      | 1.000              |
| 7M4S    | 3               | 1-B/C                                 | 1     | 0.9399   | 3.23      | 1.000              |
| 7M4S    | 3               | 2-B/C                                 | 4     | 0.9424   | 3.02      | 1.000              |
| 7M4S    | 3               | 3-B/C                                 | 5     | 0.9451   | 2.98      | 1.000              |
| 7M4S    | 3               | 4-B/C                                 | 2     | 0.9406   | 3.28      | 1.000              |
| 7M4S    | 3               | 5-B/C                                 | 3     | 0.9412   | 3.08      | 1.000              |
| 7MGV    | 3               | 1-A/B                                 | 3     | 0.9617   | 3.03      | 1.000              |
| 7MGV    | 3               | 2-A/B                                 | 1     | 0.9624   | 3.05      | 1.000              |
| 7MGV    | 3               | 3-A/B                                 | 5     | 0.9562   | 3.10      | 1.000              |
| 7MGV    | 3               | 4-A/B                                 | 4     | 0.9565   | 3.15      | 1.000              |
| 7MGV    | 3               | 5-A/B                                 | 2     | 0.9602   | 3.08      | 1.000              |
| 3VPB    | 12              | 1-A/B                                 | 5     | 0.9919   | 0.76      | 1.000              |
| 3VPB    | 12              | 2-A/B                                 | 3     | 0.9919   | 0.76      | 1.000              |
| 3VPB    | 12              | 3-A/B                                 | 2     | 0.9916   | 0.77      | 1.000              |
| 3VPB    | 12              | 4-A/B                                 | 1     | 0.9920   | 0.76      | 1.000              |
| 3VPB    | 12              | 5-A/B                                 | 4     | 0.9922   | 0.75      | 1.000              |
| 3VPB    | 12              | 1-C/D                                 | 5     | 0.9944   | 0.63      | 1.000              |
| 3VPB    | 12              | 2-C/D                                 | 3     | 0.9955   | 0.56      | 1.000              |
| 3VPB    | 12              | 3-C/D                                 | 2     | 0.9939   | 0.66      | 1.000              |

| PDB ID: | Recycle Number: | Model Number and PDB Reference Chain: | Rank: | TMscore: | RMSD (Å): | Sequence Identity: |
|---------|-----------------|---------------------------------------|-------|----------|-----------|--------------------|
| 3VPB    | 12              | 4-C/D                                 | 1     | 0.9949   | 0.60      | 1.000              |
| 3VPB    | 12              | 5-C/D                                 | 4     | 0.9945   | 0.62      | 1.000              |
| 3VPD    | 12              | 1-A/B                                 | 5     | 0.9943   | 0.66      | 1.000              |
| 3VPD    | 12              | 2-A/B                                 | 4     | 0.9946   | 0.64      | 1.000              |
| 3VPD    | 12              | 3-A/B                                 | 2     | 0.9946   | 0.64      | 1.000              |
| 3VPD    | 12              | 4-A/B                                 | 1     | 0.9946   | 0.64      | 1.000              |
| 3VPD    | 12              | 5-A/B                                 | 3     | 0.9945   | 0.64      | 1.000              |
| 5IG9    | 12              | 1-A/B                                 | 4     | 0.9782   | 3.33      | 0.981              |
| 5IG9    | 12              | 2-A/B                                 | 1     | 0.9781   | 3.38      | 0.981              |
| 5IG9    | 12              | 3-A/B                                 | 5     | 0.9779   | 3.36      | 0.981              |
| 5IG9    | 12              | 4-A/B                                 | 3     | 0.9785   | 3.39      | 0.981              |
| 5IG9    | 12              | 5-A/B                                 | 2     | 0.9779   | 3.36      | 0.981              |
| 5IG9    | 12              | 1-C/D                                 | 4     | 0.9838   | 2.35      | 0.984              |
| 5IG9    | 12              | 2-C/D                                 | 1     | 0.9837   | 2.41      | 0.984              |
| 5IG9    | 12              | 3-C/D                                 | 5     | 0.9836   | 2.39      | 0.984              |
| 5IG9    | 12              | 4-C/D                                 | 3     | 0.9841   | 2.40      | 0.984              |
| 5IG9    | 12              | 5-C/D                                 | 2     | 0.9835   | 2.39      | 0.984              |
| 5IG9    | 12              | 1-E/H                                 | 4     | 0.9812   | 2.61      | 0.982              |
| 5IG9    | 12              | 2-E/H                                 | 1     | 0.9812   | 2.67      | 0.982              |
| 5IG9    | 12              | 3-E/H                                 | 5     | 0.9811   | 2.65      | 0.982              |
| 5IG9    | 12              | 4-E/H                                 | 3     | 0.9814   | 2.68      | 0.982              |
| 5IG9    | 12              | 5-E/H                                 | 2     | 0.9809   | 2.65      | 0.982              |
| 5IG9    | 12              | 1-F/G                                 | 4     | 0.9829   | 2.66      | 0.984              |
| 5IG9    | 12              | 2-F/G                                 | 1     | 0.9828   | 2.72      | 0.984              |
| 5IG9    | 12              | 3-F/G                                 | 5     | 0.9827   | 2.70      | 0.984              |
| 5IG9    | 12              | 4-F/G                                 | 3     | 0.9832   | 2.73      | 0.984              |
| 5IG9    | 12              | 5-F/G                                 | 2     | 0.9826   | 2.70      | 0.984              |
| 7DRM    | 12              | 1-A/B                                 | 5     | 0.9688   | 2.01      | 1.000              |
| 7DRM    | 12              | 2-A/B                                 | 1     | 0.9752   | 1.44      | 1.000              |
| 7DRM    | 12              | 3-A/B                                 | 2     | 0.9707   | 2.00      | 1.000              |
| 7DRM    | 12              | 4-A/B                                 | 4     | 0.9771   | 1.38      | 1.000              |
| 7DRM    | 12              | 5-A/B                                 | 3     | 0.9758   | 1.44      | 1.000              |
| 7DRM    | 12              | 1-C/D                                 | 5     | 0.9600   | 2.54      | 0.997              |
| 7DRM    | 12              | 2-C/D                                 | 1     | 0.9667   | 1.88      | 0.997              |
| 7DRM    | 12              | 3-C/D                                 | 2     | 0.9603   | 2.59      | 0.997              |
| 7DRM    | 12              | 4-C/D                                 | 4     | 0.9686   | 1.79      | 0.997              |
| 7DRM    | 12              | 5-C/D                                 | 3     | 0.9697   | 1.68      | 0.997              |
| 7M4S    | 12              | 1-A/D                                 | 1     | 0.9440   | 3.45      | 1.000              |
| 7M4S    | 12              | 2-A/D                                 | 2     | 0.9437   | 3.34      | 1.000              |
| 7M4S    | 12              | 3-A/D                                 | 4     | 0.9485   | 3.23      | 1.000              |
| 7M4S    | 12              | 4-A/D                                 | 3     | 0.9455   | 3.47      | 1.000              |
| 7M4S    | 12              | 5-A/D                                 | 5     | 0.9446   | 3.34      | 1.000              |
| 7M4S    | 12              | 1-B/C                                 | 1     | 0.9399   | 3.24      | 1.000              |
| 7M4S    | 12              | 2-B/C                                 | 2     | 0.9417   | 3.03      | 1.000              |
| 7M4S    | 12              | 3-B/C                                 | 4     | 0.9452   | 2.99      | 1.000              |
| 7M4S    | 12              | 4-B/C                                 | 3     | 0.9423   | 3.23      | 1.000              |
| 7M4S    | 12              | 5-B/C                                 | 5     | 0.9409   | 3.07      | 1.000              |
| 7MGV    | 12              | 1-A/B                                 | 4     | 0.9605   | 2.98      | 1.000              |
| 7MGV    | 12              | 2-A/B                                 | 1     | 0.9593   | 3.06      | 1.000              |
| 7MGV    | 12              | 3-A/B                                 | 5     | 0.9569   | 3.05      | 1.000              |
| 7MGV    | 12              | 4-A/B                                 | 3     | 0.9585   | 3.11      | 1.000              |
| 7MGV    | 12              | 5-A/B                                 | 2     | 0.9602   | 3.04      | 1.000              |
| 3VPB    | 24              | 1-A/B                                 | 4     | 0.9920   | 0.75      | 1.000              |
| 3VPB    | 24              | 2-A/B                                 | 1     | 0.9919   | 0.76      | 1.000              |
| 3VPB    | 24              | 3-A/B                                 | 2     | 0.9917   | 0.77      | 1.000              |
| 3VPB    | 24              | 4-A/B                                 | 3     | 0.9924   | 0.74      | 1.000              |
| 3VPB    | 24              | 5-A/B                                 | 5     | 0.9925   | 0.73      | 1.000              |
| 3VPB    | 24              | 1-C/D                                 | 4     | 0.9943   | 0.63      | 1.000              |
| 3VPB    | 24              | 2-C/D                                 | 1     | 0.9958   | 0.55      | 1.000              |
| 3VPB    | 24              | 3-C/D                                 | 2     | 0.9938   | 0.67      | 1.000              |
| 3VPB    | 24              | 4-C/D                                 | 3     | 0.9952   | 0.58      | 1.000              |
| 3VPB    | 24              | 5-C/D                                 | 5     | 0.9947   | 0.61      | 1.000              |
| 3VPD    | 24              | 1-A/B                                 | 5     | 0.9943   | 0.66      | 1.000              |
| 3VPD    | 24              | 2-A/B                                 | 3     | 0.9946   | 0.64      | 1.000              |

| PDB ID: | Recycle Number: | Model Number and PDB Reference Chain: | Rank: | TMscore: | RMSD (Å): | Sequence Identity: |
|---------|-----------------|---------------------------------------|-------|----------|-----------|--------------------|
| 3VPD    | 24              | 3-A/B                                 | 2     | 0.9946   | 0.64      | 1.000              |
| 3VPD    | 24              | 4-A/B                                 | 1     | 0.9945   | 0.64      | 1.000              |
| 3VPD    | 24              | 5-A/B                                 | 4     | 0.9945   | 0.64      | 1.000              |
| 5IG9    | 24              | 1-A/B                                 | 4     | 0.9782   | 3.33      | 0.981              |
| 5IG9    | 24              | 2-A/B                                 | 2     | 0.9781   | 3.35      | 0.981              |
| 5IG9    | 24              | 3-A/B                                 | 5     | 0.9781   | 3.35      | 0.981              |
| 5IG9    | 24              | 4-A/B                                 | 3     | 0.9783   | 3.40      | 0.981              |
| 5IG9    | 24              | 5-A/B                                 | 1     | 0.9779   | 3.36      | 0.981              |
| 5IG9    | 24              | 1-C/D                                 | 4     | 0.9838   | 2.36      | 0.984              |
| 5IG9    | 24              | 2-C/D                                 | 2     | 0.9836   | 2.38      | 0.984              |
| 5IG9    | 24              | 3-C/D                                 | 5     | 0.9837   | 2.38      | 0.984              |
| 5IG9    | 24              | 4-C/D                                 | 3     | 0.9839   | 2.42      | 0.984              |
| 5IG9    | 24              | 5-C/D                                 | 1     | 0.9835   | 2.38      | 0.984              |
| 5IG9    | 24              | 1-E/H                                 | 4     | 0.9813   | 2.62      | 0.982              |
| 5IG9    | 24              | 2-E/H                                 | 2     | 0.9812   | 2.64      | 0.982              |
| 5IG9    | 24              | 3-E/H                                 | 5     | 0.9812   | 2.64      | 0.982              |
| 5IG9    | 24              | 4-E/H                                 | 3     | 0.9814   | 2.69      | 0.982              |
| 5IG9    | 24              | 5-E/H                                 | 1     | 0.9810   | 2.65      | 0.982              |
| 5IG9    | 24              | 1-F/G                                 | 4     | 0.9829   | 2.66      | 0.984              |
| 5IG9    | 24              | 2-F/G                                 | 2     | 0.9827   | 2.69      | 0.984              |
| 5IG9    | 24              | 3-F/G                                 | 5     | 0.9828   | 2.69      | 0.984              |
| 5IG9    | 24              | 4-F/G                                 | 3     | 0.9829   | 2.74      | 0.984              |
| 5IG9    | 24              | 5-F/G                                 | 1     | 0.9827   | 2.70      | 0.984              |
| 7DRM    | 24              | 1-A/B                                 | 4     | 0.9756   | 1.45      | 1.000              |
| 7DRM    | 24              | 2-A/B                                 | 3     | 0.9752   | 1.44      | 1.000              |
| 7DRM    | 24              | 3-A/B                                 | 1     | 0.9743   | 1.50      | 1.000              |
| 7DRM    | 24              | 4-A/B                                 | 5     | 0.9776   | 1.37      | 1.000              |
| 7DRM    | 24              | 5-A/B                                 | 2     | 0.9746   | 1.49      | 1.000              |
| 7DRM    | 24              | 1-C/D                                 | 4     | 0.9694   | 1.68      | 0.997              |
| 7DRM    | 24              | 2-C/D                                 | 3     | 0.9669   | 1.86      | 0.997              |
| 7DRM    | 24              | 3-C/D                                 | 1     | 0.9669   | 1.86      | 0.997              |
| 7DRM    | 24              | 4-C/D                                 | 5     | 0.9690   | 1.78      | 0.997              |
| 7DRM    | 24              | 5-C/D                                 | 2     | 0.9687   | 1.71      | 0.997              |
| 7M4S    | 24              | 1-A/D                                 | 1     | 0.9445   | 3.44      | 1.000              |
| 7M4S    | 24              | 2-A/D                                 | 5     | 0.9438   | 3.33      | 1.000              |
| 7M4S    | 24              | 3-A/D                                 | 4     | 0.9438   | 3.33      | 1.000              |
| 7M4S    | 24              | 4-A/D                                 | 2     | 0.9465   | 3.47      | 1.000              |
| 7M4S    | 24              | 5-A/D                                 | 3     | 0.9450   | 3.34      | 1.000              |
| 7M4S    | 24              | 1-B/C                                 | 1     | 0.9399   | 3.24      | 1.000              |
| 7M4S    | 24              | 2-B/C                                 | 5     | 0.9411   | 3.07      | 1.000              |
| 7M4S    | 24              | 3-B/C                                 | 4     | 0.9455   | 3.00      | 1.000              |
| 7M4S    | 24              | 4-B/C                                 | 2     | 0.9428   | 3.24      | 1.000              |
| 7M4S    | 24              | 5-B/C                                 | 3     | 0.9411   | 3.07      | 1.000              |
| 7MGV    | 24              | 1-A/B                                 | 5     | 0.9609   | 2.95      | 1.000              |
| 7MGV    | 24              | 2-A/B                                 | 1     | 0.9591   | 3.05      | 1.000              |
| 7MGV    | 24              | 3-A/B                                 | 4     | 0.9580   | 3.03      | 1.000              |
| 7MGV    | 24              | 4-A/B                                 | 3     | 0.9591   | 3.09      | 1.000              |
| 7MGV    | 24              | 5-A/B                                 | 2     | 0.9601   | 3.03      | 1.000              |
| 3VPB    | 48              | 1-A/B                                 | 5     | 0.9920   | 0.75      | 1.000              |
| 3VPB    | 48              | 2-A/B                                 | 3     | 0.9919   | 0.76      | 1.000              |
| 3VPB    | 48              | 3-A/B                                 | 1     | 0.9917   | 0.77      | 1.000              |
| 3VPB    | 48              | 4-A/B                                 | 2     | 0.9925   | 0.73      | 1.000              |
| 3VPB    | 48              | 5-A/B                                 | 4     | 0.9926   | 0.73      | 1.000              |
| 3VPB    | 48              | 1-C/D                                 | 5     | 0.9942   | 0.64      | 1.000              |
| 3VPB    | 48              | 2-C/D                                 | 3     | 0.9957   | 0.55      | 1.000              |
| 3VPB    | 48              | 3-C/D                                 | 1     | 0.9936   | 0.67      | 1.000              |
| 3VPB    | 48              | 4-C/D                                 | 2     | 0.9952   | 0.58      | 1.000              |
| 3VPB    | 48              | 5-C/D                                 | 4     | 0.9947   | 0.61      | 1.000              |
| 3VPD    | 48              | 1-A/B                                 | 5     | 0.9944   | 0.65      | 1.000              |
| 3VPD    | 48              | 2-A/B                                 | 4     | 0.9946   | 0.64      | 1.000              |
| 3VPD    | 48              | 3-A/B                                 | 3     | 0.9946   | 0.64      | 1.000              |
| 3VPD    | 48              | 4-A/B                                 | 1     | 0.9945   | 0.64      | 1.000              |
| 3VPD    | 48              | 5-A/B                                 | 2     | 0.9945   | 0.64      | 1.000              |
| 5IG9    | 48              | 1-A/B                                 | 3     | 0.9782   | 3.33      | 0.981              |

| PDB ID: | Recycle Number: | Model Number and PDB Reference Chain: | Rank: | TMscore: | RMSD (Å): | Sequence Identity: |
|---------|-----------------|---------------------------------------|-------|----------|-----------|--------------------|
| 5IG9    | 48              | 2-A/B                                 | 1     | 0.9781   | 3.36      | 0.981              |
| 5IG9    | 48              | 3-A/B                                 | 5     | 0.9780   | 3.36      | 0.981              |
| 5IG9    | 48              | 4-A/B                                 | 4     | 0.9781   | 3.37      | 0.981              |
| 5IG9    | 48              | 5-A/B                                 | 2     | 0.9779   | 3.37      | 0.981              |
| 5IG9    | 48              | 1-C/D                                 | 3     | 0.9838   | 2.36      | 0.984              |
| 5IG9    | 48              | 2-C/D                                 | 1     | 0.9836   | 2.38      | 0.984              |
| 5IG9    | 48              | 3-C/D                                 | 5     | 0.9836   | 2.38      | 0.984              |
| 5IG9    | 48              | 4-C/D                                 | 4     | 0.9836   | 2.40      | 0.984              |
| 5IG9    | 48              | 5-C/D                                 | 2     | 0.9835   | 2.39      | 0.984              |
| 5IG9    | 48              | 1-E/H                                 | 3     | 0.9813   | 2.62      | 0.982              |
| 5IG9    | 48              | 2-E/H                                 | 1     | 0.9812   | 2.65      | 0.982              |
| 5IG9    | 48              | 3-E/H                                 | 5     | 0.9812   | 2.65      | 0.982              |
| 5IG9    | 48              | 4-E/H                                 | 4     | 0.9812   | 2.66      | 0.982              |
| 5IG9    | 48              | 5-E/H                                 | 2     | 0.9810   | 2.66      | 0.982              |
| 5IG9    | 48              | 1-F/G                                 | 3     | 0.9829   | 2.67      | 0.984              |
| 5IG9    | 48              | 2-F/G                                 | 1     | 0.9827   | 2.70      | 0.984              |
| 5IG9    | 48              | 3-F/G                                 | 5     | 0.9828   | 2.70      | 0.984              |
| 5IG9    | 48              | 4-F/G                                 | 4     | 0.9827   | 2.71      | 0.984              |
| 5IG9    | 48              | 5-F/G                                 | 2     | 0.9827   | 2.71      | 0.984              |
| 7DRM    | 48              | 1-A/B                                 | 4     | 0.9752   | 1.46      | 1.000              |
| 7DRM    | 48              | 2-A/B                                 | 3     | 0.9741   | 1.48      | 1.000              |
| 7DRM    | 48              | 3-A/B                                 | 1     | 0.9749   | 1.47      | 1.000              |
| 7DRM    | 48              | 4-A/B                                 | 5     | 0.9775   | 1.37      | 1.000              |
| 7DRM    | 48              | 5-A/B                                 | 2     | 0.9747   | 1.48      | 1.000              |
| 7DRM    | 48              | 1-C/D                                 | 4     | 0.9689   | 1.71      | 0.997              |
| 7DRM    | 48              | 2-C/D                                 | 3     | 0.9658   | 1.90      | 0.997              |
| 7DRM    | 48              | 3-C/D                                 | 1     | 0.9664   | 1.81      | 0.997              |
| 7DRM    | 48              | 4-C/D                                 | 5     | 0.9691   | 1.78      | 0.997              |
| 7DRM    | 48              | 5-C/D                                 | 2     | 0.9686   | 1.72      | 0.997              |
| 7M4S    | 48              | 1-A/D                                 | 1     | 0.9435   | 3.44      | 1.000              |
| 7M4S    | 48              | 2-A/D                                 | 3     | 0.9429   | 3.34      | 1.000              |
| 7M4S    | 48              | 3-A/D                                 | 5     | 0.9486   | 3.23      | 1.000              |
| 7M4S    | 48              | 4-A/D                                 | 2     | 0.9460   | 3.46      | 1.000              |
| 7M4S    | 48              | 5-A/D                                 | 4     | 0.9439   | 3.35      | 1.000              |
| 7M4S    | 48              | 1-B/C                                 | 1     | 0.9393   | 3.23      | 1.000              |
| 7M4S    | 48              | 2-B/C                                 | 3     | 0.9413   | 3.04      | 1.000              |
| 7M4S    | 48              | 3-B/C                                 | 5     | 0.9449   | 2.99      | 1.000              |
| 7M4S    | 48              | 4-B/C                                 | 2     | 0.9420   | 3.25      | 1.000              |
| 7M4S    | 48              | 5-B/C                                 | 4     | 0.9403   | 3.08      | 1.000              |
| 7MGV    | 48              | 1-A/B                                 | 3     | 0.9596   | 2.98      | 1.000              |
| 7MGV    | 48              | 2-A/B                                 | 1     | 0.9580   | 3.07      | 1.000              |
| 7MGV    | 48              | 3-A/B                                 | 5     | 0.9565   | 3.04      | 1.000              |
| 7MGV    | 48              | 4-A/B                                 | 4     | 0.9577   | 3.12      | 1.000              |
| 7MGV    | 48              | 5-A/B                                 | 2     | 0.9571   | 3.07      | 1.000              |
| 3VPB    | 72              | 1-A/B                                 | 5     | 0.9920   | 0.76      | 1.000              |
| 3VPB    | 72              | 2-A/B                                 | 3     | 0.9918   | 0.76      | 1.000              |
| 3VPB    | 72              | 3-A/B                                 | 2     | 0.9915   | 0.78      | 1.000              |
| 3VPB    | 72              | 4-A/B                                 | 1     | 0.9926   | 0.73      | 1.000              |
| 3VPB    | 72              | 5-A/B                                 | 4     | 0.9924   | 0.74      | 1.000              |
| 3VPB    | 72              | 1-C/D                                 | 5     | 0.9942   | 0.64      | 1.000              |
| 3VPB    | 72              | 2-C/D                                 | 3     | 0.9957   | 0.55      | 1.000              |
| 3VPB    | 72              | 3-C/D                                 | 2     | 0.9936   | 0.67      | 1.000              |
| 3VPB    | 72              | 4-C/D                                 | 1     | 0.9953   | 0.58      | 1.000              |
| 3VPB    | 72              | 5-C/D                                 | 4     | 0.9946   | 0.62      | 1.000              |
| 3VPD    | 72              | 1-A/B                                 | 5     | 0.9944   | 0.65      | 1.000              |
| 3VPD    | 72              | 2-A/B                                 | 4     | 0.9947   | 0.63      | 1.000              |
| 3VPD    | 72              | 3-A/B                                 | 2     | 0.9947   | 0.63      | 1.000              |
| 3VPD    | 72              | 4-A/B                                 | 1     | 0.9946   | 0.64      | 1.000              |
| 3VPD    | 72              | 5-A/B                                 | 3     | 0.9946   | 0.64      | 1.000              |
| 5IG9    | 72              | 1-A/B                                 | 4     | 0.9782   | 3.33      | 0.981              |
| 5IG9    | 72              | 2-A/B                                 | 2     | 0.9779   | 3.35      | 0.981              |
| 5IG9    | 72              | 3-A/B                                 | 5     | 0.9780   | 3.36      | 0.981              |
| 5IG9    | 72              | 4-A/B                                 | 3     | 0.9780   | 3.36      | 0.981              |
| 5IG9    | 72              | 5-A/B                                 | 1     | 0.9778   | 3.36      | 0.981              |



| PDB ID: | Recycle Number: | Model Number and PDB Reference Chain: | Rank: | TMscore: | RMSD (Å): | Sequence Identity: |
|---------|-----------------|---------------------------------------|-------|----------|-----------|--------------------|
| 5IG9    | 72              | 1-C/D                                 | 4     | 0.9838   | 2.36      | 0.984              |
| 5IG9    | 72              | 2-C/D                                 | 2     | 0.9835   | 2.38      | 0.984              |
| 5IG9    | 72              | 3-C/D                                 | 5     | 0.9836   | 2.39      | 0.984              |
| 5IG9    | 72              | 4-C/D                                 | 3     | 0.9836   | 2.39      | 0.984              |
| 5IG9    | 72              | 5-C/D                                 | 1     | 0.9834   | 2.39      | 0.984              |
| 5IG9    | 72              | 1-E/H                                 | 4     | 0.9812   | 2.62      | 0.982              |
| 5IG9    | 72              | 2-E/H                                 | 2     | 0.9810   | 2.64      | 0.982              |
| 5IG9    | 72              | 3-E/H                                 | 5     | 0.9811   | 2.65      | 0.982              |
| 5IG9    | 72              | 4-E/H                                 | 3     | 0.9811   | 2.65      | 0.982              |
| 5IG9    | 72              | 5-E/H                                 | 1     | 0.9809   | 2.65      | 0.982              |
| 5IG9    | 72              | 1-F/G                                 | 4     | 0.9829   | 2.67      | 0.984              |
| 5IG9    | 72              | 2-F/G                                 | 2     | 0.9827   | 2.69      | 0.984              |
| 5IG9    | 72              | 3-F/G                                 | 5     | 0.9827   | 2.70      | 0.984              |
| 5IG9    | 72              | 4-F/G                                 | 3     | 0.9827   | 2.70      | 0.984              |
| 5IG9    | 72              | 5-F/G                                 | 1     | 0.9826   | 2.70      | 0.984              |
| 7DRM    | 72              | 1-A/B                                 | 4     | 0.9748   | 1.47      | 1.000              |
| 7DRM    | 72              | 2-A/B                                 | 3     | 0.9749   | 1.45      | 1.000              |
| 7DRM    | 72              | 3-A/B                                 | 1     | 0.9750   | 1.47      | 1.000              |
| 7DRM    | 72              | 4-A/B                                 | 5     | 0.9795   | 1.30      | 1.000              |
| 7DRM    | 72              | 5-A/B                                 | 2     | 0.9747   | 1.48      | 1.000              |
| 7DRM    | 72              | 1-C/D                                 | 4     | 0.9685   | 1.72      | 0.997              |
| 7DRM    | 72              | 2-C/D                                 | 3     | 0.9664   | 1.89      | 0.997              |
| 7DRM    | 72              | 3-C/D                                 | 1     | 0.9665   | 1.81      | 0.997              |
| 7DRM    | 72              | 4-C/D                                 | 5     | 0.9707   | 1.73      | 0.997              |
| 7DRM    | 72              | 5-C/D                                 | 2     | 0.9687   | 1.71      | 0.997              |
| 7M4S    | 72              | 1-A/D                                 | 2     | 0.9439   | 3.44      | 1.000              |
| 7M4S    | 72              | 2-A/D                                 | 4     | 0.9436   | 3.34      | 1.000              |
| 7M4S    | 72              | 3-A/D                                 | 5     | 0.9493   | 3.23      | 1.000              |
| 7M4S    | 72              | 4-A/D                                 | 1     | 0.9467   | 3.47      | 1.000              |
| 7M4S    | 72              | 5-A/D                                 | 3     | 0.9477   | 3.26      | 1.000              |
| 7M4S    | 72              | 1-B/C                                 | 2     | 0.9394   | 3.24      | 1.000              |
| 7M4S    | 72              | 2-B/C                                 | 4     | 0.9415   | 3.04      | 1.000              |
| 7M4S    | 72              | 3-B/C                                 | 5     | 0.9454   | 3.00      | 1.000              |
| 7M4S    | 72              | 4-B/C                                 | 1     | 0.9425   | 3.26      | 1.000              |
| 7M4S    | 72              | 5-B/C                                 | 3     | 0.9429   | 3.03      | 1.000              |
| 7MGV    | 72              | 1-A/B                                 | 5     | 0.9607   | 2.96      | 1.000              |
| 7MGV    | 72              | 2-A/B                                 | 1     | 0.9589   | 3.05      | 1.000              |
| 7MGV    | 72              | 3-A/B                                 | 3     | 0.9580   | 3.02      | 1.000              |
| 7MGV    | 72              | 4-A/B                                 | 4     | 0.9582   | 3.11      | 1.000              |
| 7MGV    | 72              | 5-A/B                                 | 2     | 0.9581   | 3.06      | 1.000              |

**Table S7.** All Non-ATP Grasp Ligase RiPP biosynthetic enzyme US-align results. Enzymes with multiple available reference subunits are notated with their corresponding chain letters.

| PDB ID: | Model Number: | Rank: | TMscore: | RMSD (Å): | Sequence Identity: |
|---------|---------------|-------|----------|-----------|--------------------|
| 5DZT    | 1             | 4     | 0.99536  | 0.72      | 1.000              |
| 5DZT    | 2             | 1     | 0.99491  | 0.78      | 1.000              |
| 5DZT    | 3             | 3     | 0.92851  | 2.92      | 1.000              |
| 5DZT    | 4             | 5     | 0.92207  | 3.09      | 1.000              |
| 5DZT    | 5             | 2     | 0.92397  | 3.06      | 1.000              |
| 4WD9    | 1             | 5     | 0.99284  | 3.94      | 0.994              |
| 4WD9    | 2             | 4     | 0.99228  | 3.94      | 0.994              |
| 4WD9    | 3             | 1     | 0.99201  | 3.96      | 0.994              |
| 4WD9    | 4             | 3     | 0.99226  | 3.91      | 0.994              |
| 4WD9    | 5             | 2     | 0.99268  | 3.94      | 0.994              |
| 5W99    | 1             | 1     | 0.99725  | 0.34      | 1.000              |
| 5W99    | 2             | 2     | 0.99652  | 0.39      | 1.000              |
| 5W99    | 3             | 4     | 0.98235  | 0.93      | 1.000              |
| 5W99    | 4             | 5     | 0.97966  | 1.02      | 1.000              |
| 5W99    | 5             | 3     | 0.98630  | 0.83      | 1.000              |
| 6EC8    | 1             | 2     | 0.99462  | 0.81      | 1.000              |

| PDB ID: | Model Number: | Rank: | TMscore: | RMSD (Å): | Sequence Identity: |
|---------|---------------|-------|----------|-----------|--------------------|
| 6EC8    | 2             | 1     | 0.99440  | 0.84      | 1.000              |
| 6EC8    | 3             | 3     | 0.96277  | 1.99      | 1.000              |
| 6EC8    | 4             | 5     | 0.9570   | 2.15      | 1.000              |
| 6EC8    | 5             | 4     | 0.9659   | 1.92      | 1.000              |
| 4BS9    | 1             | 4     | 0.9571   | 2.03      | 1.000              |
| 4BS9    | 2             | 2     | 0.9596   | 1.97      | 1.000              |
| 4BS9    | 3             | 3     | 0.9526   | 2.14      | 1.000              |
| 4BS9    | 4             | 5     | 0.9505   | 2.18      | 1.000              |
| 4BS9    | 5             | 1     | 0.9448   | 2.31      | 1.000              |
| 6PEU    | 1-A/B         | 2     | 0.9760   | 1.50      | 1.000              |
| 6PEU    | 2-A/B         | 1     | 0.9771   | 1.46      | 1.000              |
| 6PEU    | 3-A/B         | 3     | 0.9331   | 2.59      | 1.000              |
| 6PEU    | 4-A/B         | 5     | 0.8184   | 4.70      | 1.000              |
| 6PEU    | 5-A/B         | 4     | 0.8728   | 3.76      | 1.000              |
| 6PEU    | 1-C/D         | 2     | 0.9746   | 2.64      | 1.000              |
| 6PEU    | 2-C/D         | 1     | 0.9763   | 2.61      | 1.000              |
| 6PEU    | 3-C/D         | 3     | 0.9369   | 3.27      | 1.000              |
| 6PEU    | 4-C/D         | 5     | 0.8062   | 5.26      | 1.000              |
| 6PEU    | 5-C/D         | 4     | 0.8642   | 4.38      | 1.000              |
| 4H6V    | 1             | 5     | 0.9587   | 2.58      | 1.000              |
| 4H6V    | 2             | 2     | 0.9589   | 2.59      | 1.000              |
| 4H6V    | 3             | 1     | 0.9549   | 2.63      | 1.000              |
| 4H6V    | 4             | 4     | 0.9532   | 2.70      | 1.000              |
| 4H6V    | 5             | 3     | 0.9537   | 2.69      | 1.000              |
| 5N0Q    | 1             | 3     | 0.9875   | 1.91      | 0.996              |
| 5N0Q    | 2             | 5     | 0.9892   | 1.86      | 0.996              |
| 5N0Q    | 3             | 2     | 0.9890   | 1.87      | 0.996              |
| 5N0Q    | 4             | 4     | 0.9897   | 1.85      | 0.996              |
| 5N0Q    | 5             | 1     | 0.9896   | 1.85      | 0.996              |
| 5FF5    | 1             | 3     | 0.9736   | 1.81      | 1.000              |
| 5FF5    | 2             | 1     | 0.9757   | 1.74      | 1.000              |
| 5FF5    | 3             | 4     | 0.9592   | 2.24      | 1.000              |
| 5FF5    | 4             | 5     | 0.9719   | 1.85      | 1.000              |
| 5FF5    | 5             | 2     | 0.9753   | 1.75      | 1.000              |
| 6JX3    | 1             | 3     | 0.9856   | 0.40      | 1.000              |
| 6JX3    | 2             | 4     | 0.9818   | 0.46      | 1.000              |
| 6JX3    | 3             | 2     | 0.9589   | 0.78      | 1.000              |
| 6JX3    | 4             | 1     | 0.9577   | 0.81      | 1.000              |
| 6JX3    | 5             | 5     | 0.9598   | 0.79      | 1.000              |
| 6OM4    | 1-A           | 2     | 0.9849   | 0.85      | 1.000              |
| 6OM4    | 2-A           | 1     | 0.9856   | 0.82      | 1.000              |
| 6OM4    | 3-A           | 4     | 0.9685   | 1.35      | 1.000              |
| 6OM4    | 4-A           | 5     | 0.9611   | 1.72      | 1.000              |
| 6OM4    | 5-A           | 3     | 0.9720   | 1.23      | 1.000              |
| 6OM4    | 1-B           | 2     | 0.9899   | 0.69      | 1.000              |
| 6OM4    | 2-B           | 1     | 0.9900   | 0.68      | 1.000              |
| 6OM4    | 3-B           | 4     | 0.9672   | 1.42      | 1.000              |
| 6OM4    | 4-B           | 5     | 0.9578   | 1.84      | 1.000              |
| 6OM4    | 5-B           | 3     | 0.9704   | 1.26      | 1.000              |
| 4KVZ    | 1             | 1     | 0.9754   | 1.29      | 1.000              |
| 4KVZ    | 2             | 2     | 0.9765   | 1.23      | 1.000              |
| 4KVZ    | 3             | 3     | 0.9775   | 1.14      | 1.000              |
| 4KVZ    | 4             | 5     | 0.9760   | 1.20      | 1.000              |
| 4KVZ    | 5             | 4     | 0.9772   | 1.14      | 1.000              |
| 4KWC    | 1             | 3     | 0.9953   | 0.41      | 1.000              |
| 4KWC    | 2             | 1     | 0.9953   | 0.41      | 1.000              |
| 4KWC    | 3             | 4     | 0.9896   | 0.62      | 1.000              |
| 4KWC    | 4             | 5     | 0.9900   | 0.61      | 1.000              |
| 4KWC    | 5             | 2     | 0.9844   | 0.77      | 1.000              |
| 6JDD    | 1             | 3     | 0.9980   | 0.23      | 1.000              |
| 6JDD    | 2             | 5     | 0.9978   | 0.24      | 1.000              |
| 6JDD    | 3             | 2     | 0.9710   | 1.32      | 1.000              |
| 6JDD    | 4             | 4     | 0.9734   | 1.31      | 1.000              |
| 6JDD    | 5             | 1     | 0.9724   | 1.30      | 1.000              |
| 5TTY    | 1             | 2     | 0.9847   | 1.05      | 1.000              |

| PDB ID: | Model Number: | Rank: | TMscore: | RMSD (Å): | Sequence Identity: |
|---------|---------------|-------|----------|-----------|--------------------|
| 5TTY    | 2             | 1     | 0.9851   | 1.02      | 1.000              |
| 5TTY    | 3             | 4     | 0.9741   | 1.22      | 1.000              |
| 5TTY    | 4             | 5     | 0.9697   | 1.33      | 1.000              |
| 5TTY    | 5             | 3     | 0.9754   | 1.17      | 1.000              |
| 6C0Y    | 1-A/E         | 3     | 0.9949   | 0.40      | 1.000              |
| 6C0Y    | 2-A/E         | 1     | 0.9951   | 0.39      | 1.000              |
| 6C0Y    | 3-A/E         | 4     | 0.9949   | 0.40      | 1.000              |
| 6C0Y    | 4-A/E         | 5     | 0.9949   | 0.40      | 1.000              |
| 6C0Y    | 5-A/E         | 2     | 0.9952   | 0.38      | 1.000              |
| 6C0Y    | 1-C/G         | 3     | 0.9926   | 0.48      | 1.000              |
| 6C0Y    | 2-C/G         | 1     | 0.9917   | 0.51      | 1.000              |
| 6C0Y    | 3-C/G         | 4     | 0.9910   | 0.53      | 1.000              |
| 6C0Y    | 4-C/G         | 5     | 0.9923   | 0.49      | 1.000              |
| 6C0Y    | 5-C/G         | 2     | 0.9918   | 0.50      | 1.000              |
| 6C0Y    | 1-B/F         | 3     | 0.9949   | 0.40      | 1.000              |
| 6C0Y    | 2-B/F         | 1     | 0.9952   | 0.38      | 1.000              |
| 6C0Y    | 3-B/F         | 4     | 0.9950   | 0.39      | 1.000              |
| 6C0Y    | 4-B/F         | 5     | 0.9949   | 0.40      | 1.000              |
| 6C0Y    | 5-B/F         | 2     | 0.9953   | 0.38      | 1.000              |
| 6C0Y    | 1-H/D         | 3     | 0.9937   | 0.44      | 1.000              |
| 6C0Y    | 2-H/D         | 1     | 0.9938   | 0.44      | 1.000              |
| 6C0Y    | 3-H/D         | 4     | 0.9932   | 0.46      | 1.000              |
| 6C0Y    | 4-H/D         | 5     | 0.9937   | 0.44      | 1.000              |
| 6C0Y    | 5-H/D         | 2     | 0.9938   | 0.44      | 1.000              |

**Figure S3.** Comparison of change in TMscore and RMSD upon changing parameters.

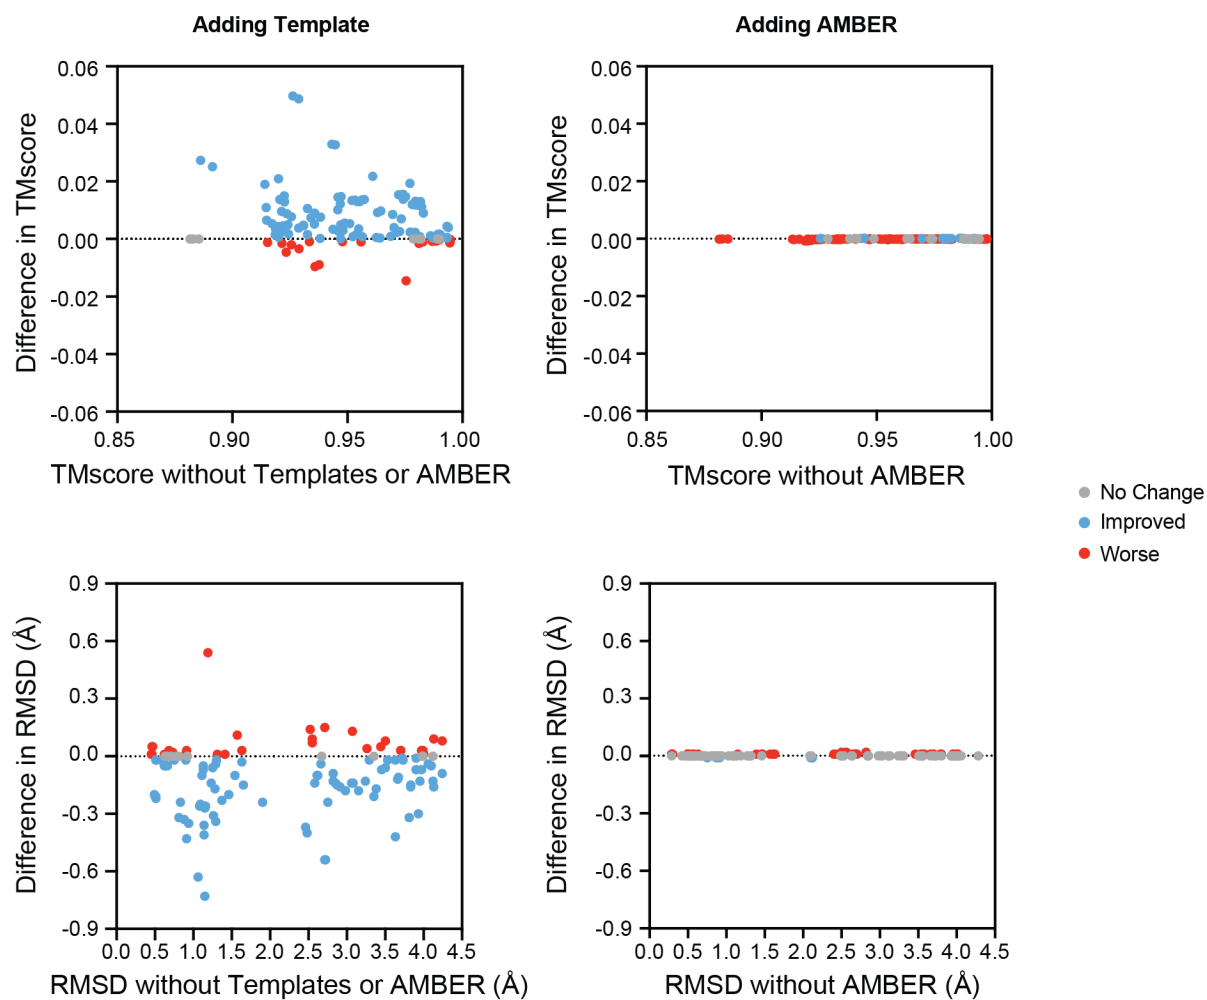

**Figure S4.** Comparison of monomer structure predictions to each other. Mean TMscores and RMSD are represented by the horizontal lines. Error bars represent standard deviations, and gray circles are values from individual comparisons.

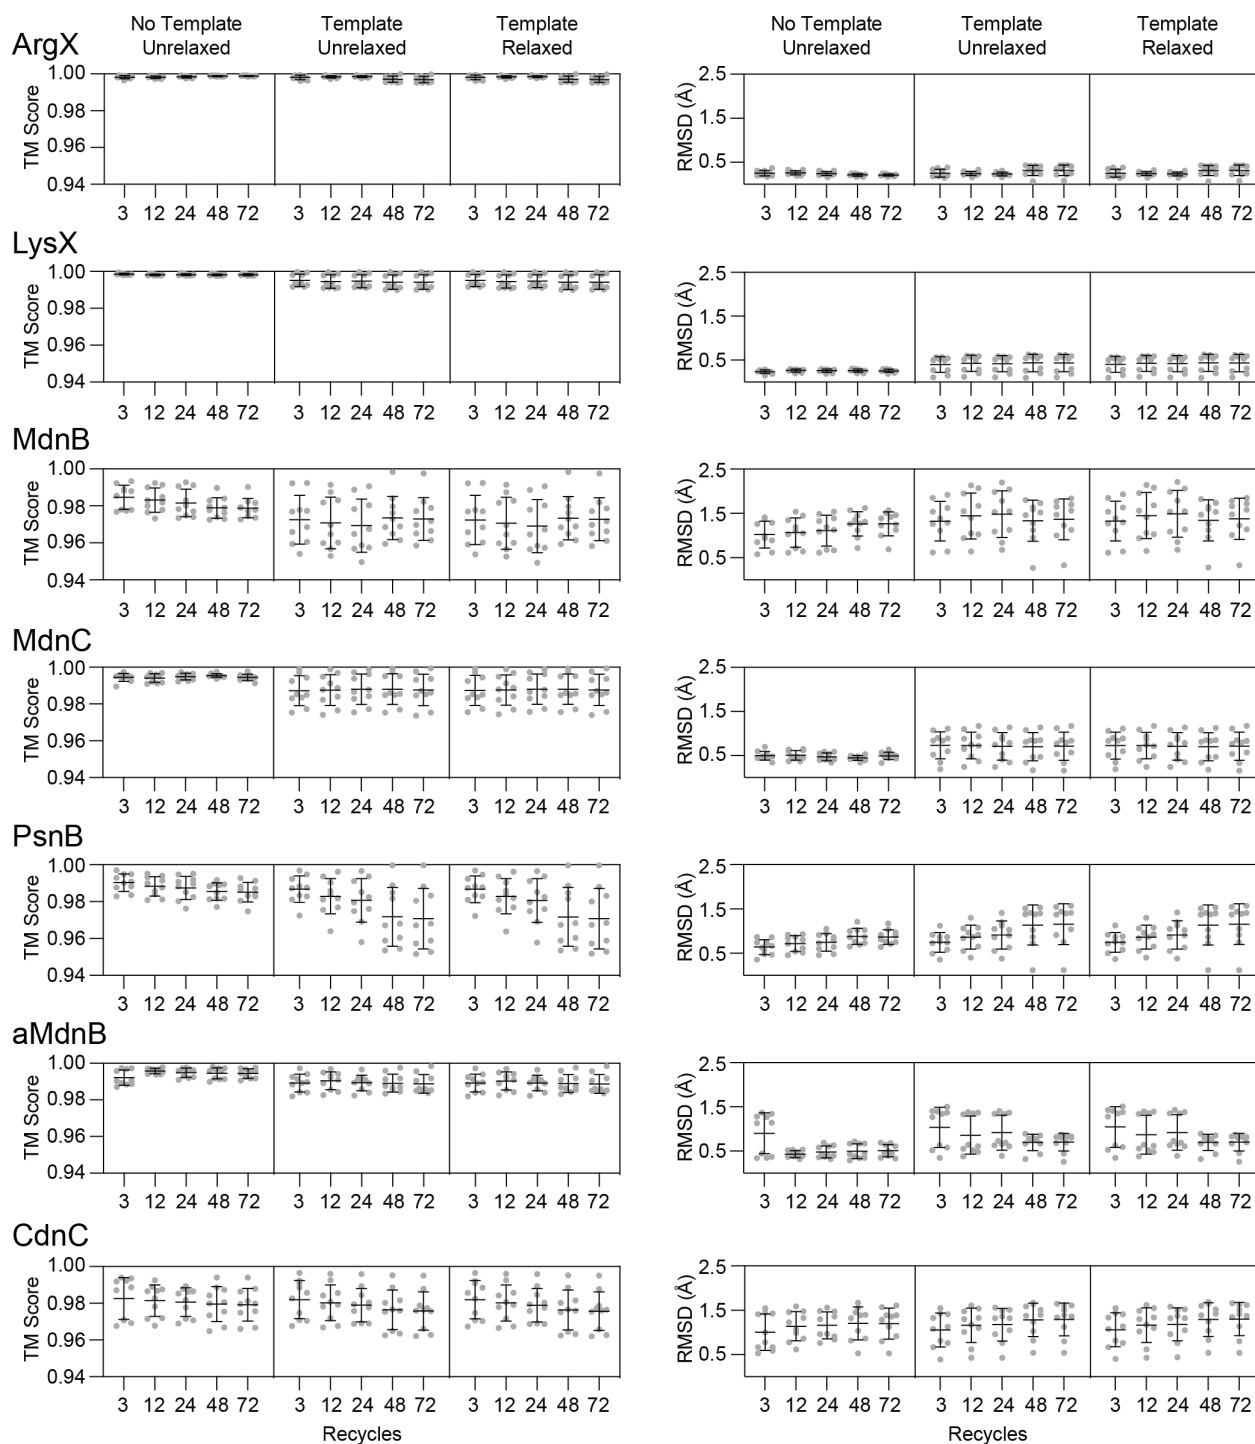

**Figure S5.** All Non-ATP Grasp Ligase RiPP biosynthetic enzyme predicted models aligned to reported PDB structure (yellow)

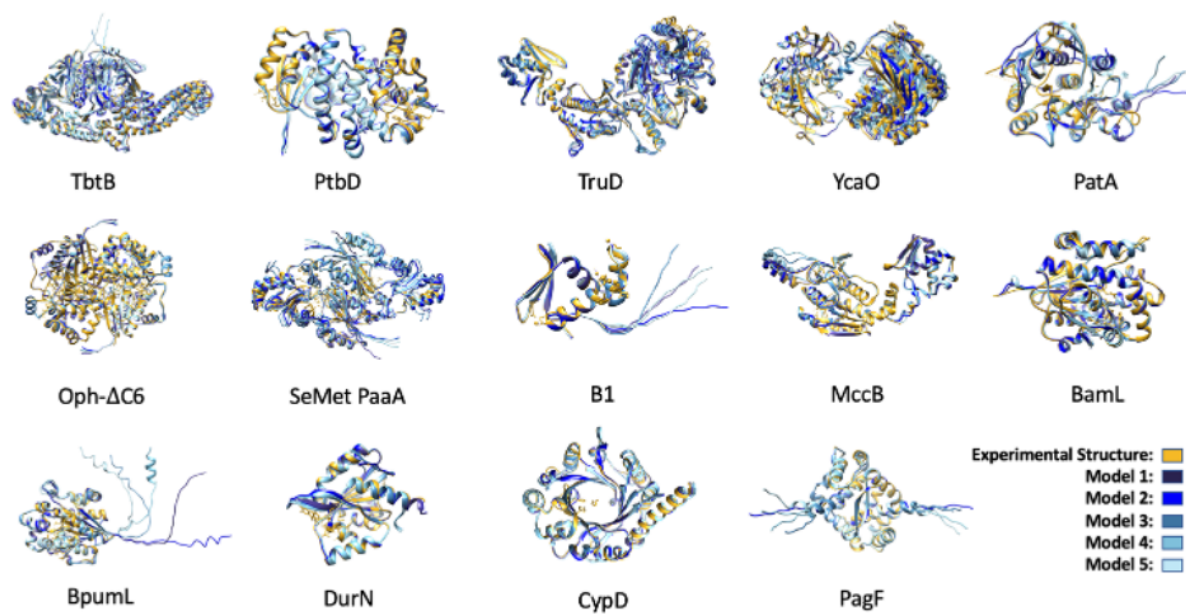

Supplement: s1 [file s1]
